# Supplementary material for: On the Lewis acidic character of bis(salicylaldiminato)zinc(ii) Schiff-base complexes: a computational and experimental investigation on a series of compounds varying the bridging diimine
Source: Royal Society of Chemistry journal article supplement (doi:10.1039/c7dt00574a), 2017-01-01
Supplement: c7dt00574a1.pdf [file c7dt00574a1.pdf]

## Electronic Supplementary Information

### **On the Lewis acidic character of bis(salicylaldiminato)zinc(II) Schiff-base complexes: a computational and experimental investigation on a series of compounds varying the bridging diimine**

Giuseppe Forte,<sup>\*,a</sup> Ivan Pietro Oliveri,<sup>b</sup> Giuseppe Consiglio,<sup>b</sup> Salvatore Failla<sup>b</sup> and Santo Di Bella<sup>\*,b</sup>

---

<sup>a</sup> *Dipartimento di Scienze del Farmaco, Università di Catania, I-95125 Catania, Italy.*  
*E-mail: [gforte@unict.it](mailto:gforte@unict.it)*

<sup>b</sup> *Dipartimento di Scienze Chimiche, Università di Catania, I-95125 Catania, Italy.*  
*E-mail: [sdibella@unict.it](mailto:sdibella@unict.it)*

## Contents

|              |                                                                                                                                     |      |
|--------------|-------------------------------------------------------------------------------------------------------------------------------------|------|
| <b>I.</b>    | <u>Calculated atomic charges on relevant atoms and dipole moment for monomers, dimers, and adducts</u> .....                        | S3   |
| <b>II.</b>   | <u>Charge decomposition analysis and frontier MOs for Zn(sal)<sub>2</sub> and Zn(salen)</u> .....                                   | S4   |
| <b>III.</b>  | <u>Optimised molecular structure for Zn(sal)<sub>2</sub> and ZnL complexes</u> .....                                                | S7   |
| <b>IV.</b>   | <u>Optimised molecular structure for ZnL dimers</u> .....                                                                           | S37  |
| <b>V.</b>    | <u>Optimised molecular structure for ZnL·py adducts</u> .....                                                                       | S79  |
| <b>VI.</b>   | <u>Parameters of distortion from the planarity of the N<sub>2</sub>O<sub>2</sub> coordinated atoms for dimers and adducts</u> ..... | S106 |
| <b>VII.</b>  | <u>Correlation between distortion parameters Φ and Ψ vs. ΔG of dimerization and formation of pyridine adducts</u> .....             | S119 |
| <b>VIII.</b> | <u>Spectrophotometric titration of <b>4a</b> with pyridine</u> .....                                                                | S121 |
| <b>IX.</b>   | <u>Binding isotherms of complexes <b>2</b>, <b>3a</b>, <b>5a</b> and <b>6a</b> with pyridine</u> .....                              | S122 |
| <b>X.</b>    | <u>Experimental derived binding constants for the formation of <b>1-6</b>·py adducts</u> .....                                      | S124 |

**I. Calculated atomic charges on relevant atoms and dipole moment for monomers, dimers, and adducts**

**Table S1** Calculated atomic charges ( $e$ ) on relevant atoms and dipole moment ( $\mu$ , Debye) for  $\text{Zn}(\text{sal})_2$  and  $\text{ZnL}$  monomers <sup>a</sup>

|       | $\text{Zn}(\text{sal})_2$ | $\text{Zn}(\text{salen})$ | <b>1</b> | <b>2</b> | <b>3</b> | <b>4</b> | <b>5</b> | <b>6</b> |
|-------|---------------------------|---------------------------|----------|----------|----------|----------|----------|----------|
| Zn    | 0.91                      | 1.09                      | 1.08     | 1.29     | 1.28     | 1.25     | 1.28     | 1.21     |
| O     | -0.60                     | -0.68                     | -0.68    | -0.64    | -0.67    | -0.66    | -0.66    | -0.64    |
| O'    | -0.63                     | -0.66                     | -0.67    | -0.70    | -0.67    | -0.66    | -0.68    | -0.64    |
| N     | -0.29                     | -0.56                     | -0.56    | -0.64    | -0.50    | -0.60    | -0.59    | -0.53    |
| N'    | -0.29                     | -0.51                     | -0.55    | -0.71    | -0.50    | -0.60    | -0.85    | -0.53    |
| $\mu$ | 4.04                      | 5.35                      | 5.43     | 2.62     | 4.98     | 3.74     | 3.34     | 3.41     |

<sup>a</sup> See Scheme 1 for atom labelling.

**Table S2** Calculated atomic charges ( $e$ ) on relevant atoms and dipole moment ( $\mu$ , Debye) for  $\text{ZnL}$  dimers <sup>a</sup>

|       | $[\text{Zn}(\text{salen})]_2$ | <b>1D</b> | <b>2D</b> | <b>3D</b> | <b>4D</b> | <b>5D</b> | <b>6D</b> |
|-------|-------------------------------|-----------|-----------|-----------|-----------|-----------|-----------|
| Zn    | 1.12                          | 1.02      | 1.16      | 1.23      | 1.22      | 1.29      | 1.19      |
| O     | -0.69                         | -0.68     | -0.64     | -0.72     | -0.70     | -0.70     | -0.68     |
| O'    | -0.72                         | -0.62     | -0.67     | -0.68     | -0.70     | -0.72     | -0.70     |
| N     | -0.35                         | -0.38     | -0.51     | -0.55     | -0.67     | -0.93     | -0.65     |
| N'    | -0.35                         | -0.37     | -0.41     | -0.40     | -0.46     | -0.45     | -0.40     |
| $\mu$ | 0.000                         | 0.000     | 3.71      | 0.000     | 0.000     | 0.000     | 0.000     |

<sup>a</sup> See Table 2 for atom labelling.

**Table S3** Calculated atomic charges ( $e$ ) on relevant atoms and dipole moment ( $\mu$ , Debye) for **1-6**·py adducts <sup>a</sup>

|                 | <b>1·py</b> | <b>2·py</b> | <b>3·py</b> | <b>4·py</b> | <b>5·py</b> | <b>6·py</b> |
|-----------------|-------------|-------------|-------------|-------------|-------------|-------------|
| Zn              | 0.91        | 1.16        | 1.12        | 1.07        | 1.26        | 1.12        |
| O               | -0.59       | -0.63       | -0.65       | -0.64       | -0.68       | -0.65       |
| O'              | -0.60       | -0.67       | -0.65       | -0.63       | -0.67       | -0.66       |
| N               | -0.26       | -0.62       | -0.36       | -0.46       | -0.57       | -0.47       |
| N'              | -0.33       | -0.74       | -0.35       | -0.52       | -0.85       | -0.50       |
| N <sub>py</sub> | -0.37       | -0.23       | -0.37       | -0.30       | -0.34       | -0.24       |
| $\mu$           | 5.96        | 4.62        | 7.66        | 4.38        | 4.88        | 3.66        |

<sup>a</sup> See Table 5 for atom labelling.

## II. Charge decomposition analysis and frontier MOs for Zn(sal)<sub>2</sub> and Zn(salen)

In order to better understanding the origin of the different atomic charge, in terms of MOs, on the Zn atom in Zn(sal)<sub>2</sub> and Zn(salen) a charge decomposition analysis, CDA, was performed. From the CDA it can see that the net charge transfer from L<sup>2-</sup> to Zn<sup>2+</sup> is higher for Zn(Sal)<sub>2</sub> with respect Zn(Salen). In particular, a charge transfer of 0.244 *e* is found for Zn(Salen) while 0.293 *e* is obtained for Zn(Sal)<sub>2</sub>. Note that the charge transfer does not correspond exactly to the calculated atomic charge because the CDA method, besides charge transfer between fragments, includes the electronic polarization of fragments.

A detailed analysis reveals that the main contribution to such transfer is due to the HOMO-39, HOMO-33 and HOMO-15 in Zn(Salen), while the HOMO-40 HOMO-34 HOMO-15 and HOMO-9 are mainly involved in Zn(Sal)<sub>2</sub> (Fig. S1). In Table S1 is reported the contribution of the two fragments, *i.e.*, the Zn<sup>2+</sup> and L<sup>2-</sup>, to the molecular orbitals mentioned above. The composition of such MOs in terms of atomic orbitals is reported in Table S2. As far as the Zn(Salen) is concerned it results that L<sup>2-</sup> gives a predominant contribution by means of p-type orbitals in molecular orbitals lower in energy (HOMO-39 and HOMO-33), while the s-type percentage is higher in H-15. The p-type contribution arises from heteroatoms, nitrogen in particular, lying along the direction of zinc, the latter of which is involved by means of 4s, and 3dx<sup>2</sup>-y<sup>2</sup> and dz<sup>2</sup> orbitals. At variance of Zn(Salen), in Zn(Sal)<sub>2</sub> the contribution of p-type atomic orbitals of the ligand increases with the decreasing of the MOs energy while the zinc contributes with the same type of d orbitals described for Zn(Salen).

**Table S4** Relevant MOs involved in the charge transfer between L<sup>2-</sup> and Zn<sup>2+</sup> fragments

| Zn(Salen) |                   |                    |
|-----------|-------------------|--------------------|
| MO        | % L <sup>2-</sup> | % Zn <sup>2+</sup> |
| H-39      | 95.55             | 4.45               |
| H-33      | 89.00             | 11.00              |
| H-15      | 88.08             | 11.92              |

  

| Zn(Sal) <sub>2</sub> |                   |                    |
|----------------------|-------------------|--------------------|
| MO                   | % L <sup>2-</sup> | % Zn <sup>2+</sup> |
| H-40                 | 95.42             | 4.58               |
| H-34                 | 92.75             | 7.25               |
| H-15                 | 95.17             | 4.83               |
| H-9                  | 88.31             | 11.69              |

**Table S5** Atomic orbital composition of relevant MOs involved in the charge transfer between L<sup>2-</sup> and Zn<sup>2+</sup> fragments

| Zn(Salen)                |       |       |       |
|--------------------------|-------|-------|-------|
| MO                       | %s    | %p    | %d    |
| H-39 (L <sup>2-</sup> )  | 41.15 | 58.85 | 0.00  |
| H-39 (Zn <sup>2+</sup> ) | 31.91 | 0.00  | 68.09 |
| H-33 (L <sup>2-</sup> )  | 41.32 | 58.68 | 0.00  |
| H-33 (Zn <sup>2+</sup> ) | 27.20 | 0.36  | 72.44 |
| H-15 (L <sup>2-</sup> )  | 67.87 | 32.13 | 0.00  |
| H-15 (Zn <sup>2+</sup> ) | 72.57 | 0.65  | 26.78 |

  

| Zn(Sal) <sub>2</sub>     |       |       |       |
|--------------------------|-------|-------|-------|
| MO                       | %s    | %p    | %d    |
| H-40 (L <sup>2-</sup> )  | 50.86 | 49.14 | 0.00  |
| H-40 (Zn <sup>2+</sup> ) | 97.60 | 2.40  | 0.00  |
| H-34 (L <sup>2-</sup> )  | 50.57 | 59.43 | 0.00  |
| H-34 (Zn <sup>2+</sup> ) | 55.17 | 0.00  | 44.83 |
| H-15 (L <sup>2-</sup> )  | 30.85 | 66.65 | 0.00  |
| H-15 (Zn <sup>2+</sup> ) | 67.08 | 0.00  | 32.92 |
| H-9 (L <sup>2-</sup> )   | 15.46 | 84.54 | 0.00  |
| H-9 (Zn <sup>2+</sup> )  | 12.90 | 0.62  | 86.48 |

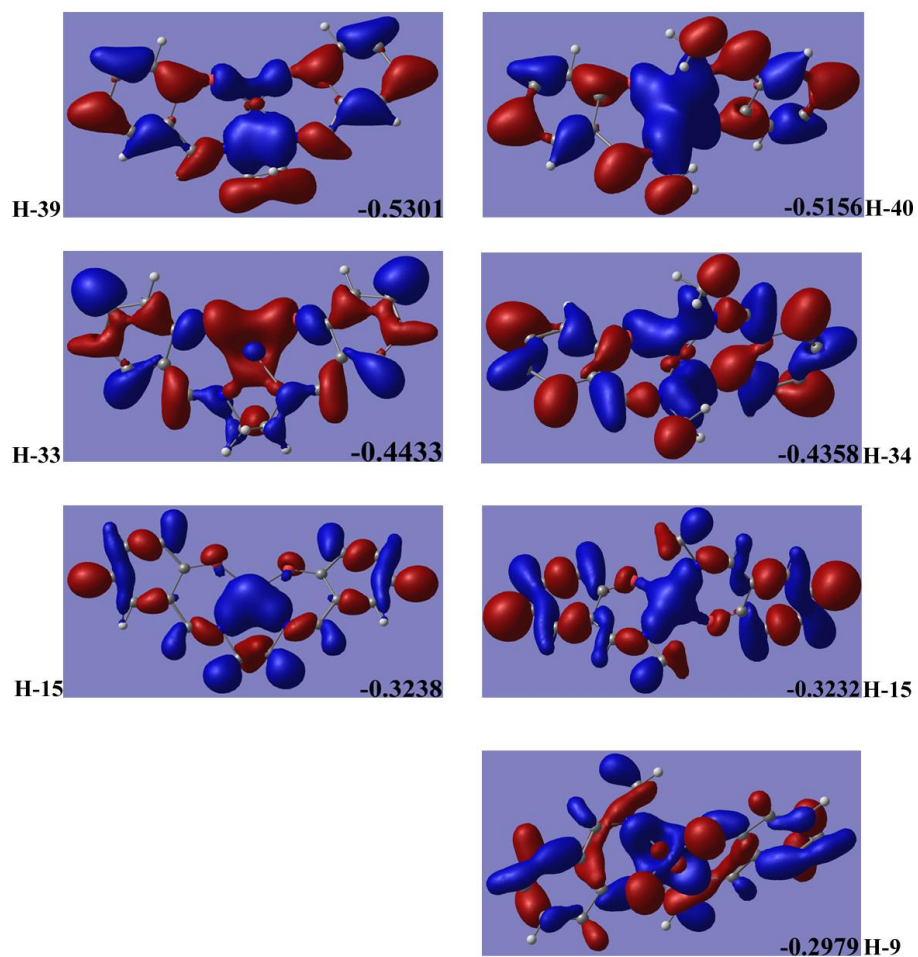

**Fig. S1** Main MOs involved in the charge transfer from  $L^{2-}$  to  $Zn^{2+}$  for  $Zn(salen)$  (left) and  $Zn(sal)_2$

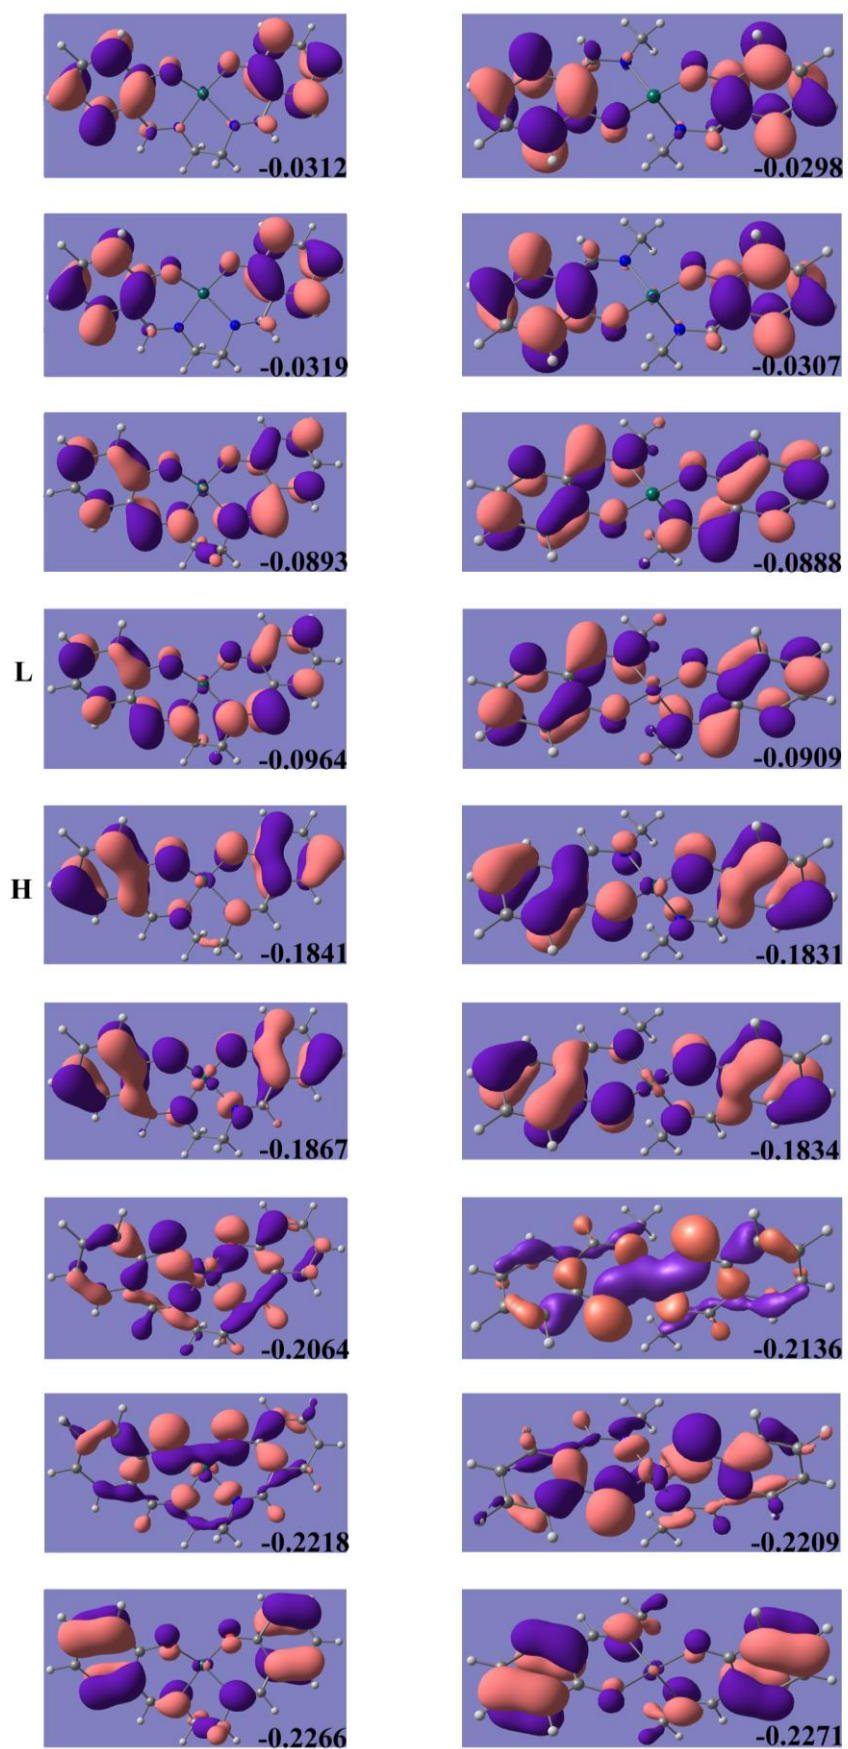

**Fig. S2** Frontier MOs and energies (a.u.) for optimized structures of Zn(salen) (left) and Zn(sal)<sub>2</sub> (right).

### III. Optimised molecular structure for Zn(sal)<sub>2</sub> and ZnL complexes

#### Zn(sal)<sub>2</sub>

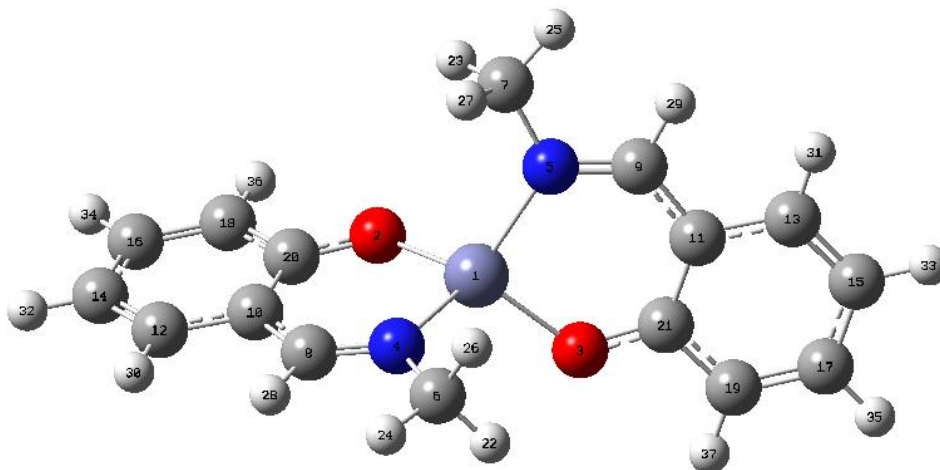

#### Cartesian Coordinates

|    |    | X      | Y      | Z      |
|----|----|--------|--------|--------|
| 1  | Zn | 0.000  | 0.000  | 0.086  |
| 2  | O  | -0.583 | -1.634 | -0.808 |
| 3  | O  | 0.583  | 1.634  | -0.808 |
| 4  | N  | 1.550  | -0.839 | 1.075  |
| 5  | N  | -1.550 | 0.839  | 1.075  |
| 6  | C  | 2.421  | -0.021 | 1.913  |
| 7  | C  | -2.421 | 0.021  | 1.913  |
| 8  | C  | 1.843  | -2.102 | 0.913  |
| 9  | C  | -1.843 | 2.102  | 0.913  |
| 10 | C  | 1.156  | -3.078 | 0.113  |
| 11 | C  | -1.156 | 3.078  | 0.113  |
| 12 | C  | 1.690  | -4.398 | 0.139  |
| 13 | C  | -1.690 | 4.398  | 0.139  |
| 14 | C  | 1.133  | -5.433 | -0.591 |
| 15 | C  | -1.133 | 5.433  | -0.591 |
| 16 | C  | 0.000  | -5.163 | -1.391 |
| 17 | C  | 0.000  | 5.163  | -1.391 |
| 18 | C  | -0.549 | -3.893 | -1.450 |
| 19 | C  | 0.549  | 3.893  | -1.450 |
| 20 | C  | -0.006 | -2.801 | -0.707 |
| 21 | C  | 0.006  | 2.801  | -0.707 |
| 22 | H  | 2.820  | 0.818  | 1.322  |
| 23 | H  | -2.820 | -0.818 | 1.322  |
| 24 | H  | 3.262  | -0.606 | 2.325  |
| 25 | H  | -3.262 | 0.606  | 2.325  |
| 26 | H  | 1.844  | 0.409  | 2.748  |
| 27 | H  | -1.844 | -0.409 | 2.748  |
| 28 | H  | 2.732  | -2.485 | 1.448  |
| 29 | H  | -2.732 | 2.485  | 1.448  |
| 30 | H  | 2.571  | -4.582 | 0.763  |
| 31 | H  | -2.571 | 4.582  | 0.763  |
| 32 | H  | 1.562  | -6.435 | -0.552 |

|    |   |        |        |        |
|----|---|--------|--------|--------|
| 33 | H | -1.562 | 6.435  | -0.552 |
| 34 | H | -0.451 | -5.969 | -1.978 |
| 35 | H | 0.451  | 5.969  | -1.978 |
| 36 | H | -1.422 | -3.679 | -2.071 |
| 37 | H | 1.422  | 3.679  | -2.071 |

### Structural parameters

|           |        |
|-----------|--------|
| R(1-3)    | 1.952  |
| R(1-2)    | 1.952  |
| R(1-5)    | 2.021  |
| R(1-4)    | 2.021  |
| R(2-20)   | 1.306  |
| R(3-21)   | 1.306  |
| R(4-8)    | 1.306  |
| R(4-6)    | 1.459  |
| R(5-7)    | 1.459  |
| R(5-9)    | 1.306  |
| R(6-22)   | 1.102  |
| R(6-24)   | 1.104  |
| R(6-26)   | 1.102  |
| R(7-25)   | 1.104  |
| R(7-27)   | 1.102  |
| R(7-23)   | 1.102  |
| R(8-10)   | 1.437  |
| R(8-28)   | 1.106  |
| R(9-11)   | 1.437  |
| R(9-29)   | 1.106  |
| R(10-12)  | 1.424  |
| R(10-20)  | 1.449  |
| R(11-13)  | 1.424  |
| R(11-21)  | 1.449  |
| R(12-14)  | 1.383  |
| R(12-30)  | 1.095  |
| R(13-15)  | 1.383  |
| R(13-31)  | 1.095  |
| R(14-16)  | 1.414  |
| R(14-32)  | 1.091  |
| R(15-17)  | 1.414  |
| R(15-33)  | 1.091  |
| R(16-18)  | 1.385  |
| R(16-34)  | 1.094  |
| R(17-19)  | 1.385  |
| R(17-35)  | 1.094  |
| R(18-20)  | 1.428  |
| R(18-36)  | 1.092  |
| R(19-21)  | 1.428  |
| R(19-37)  | 1.092  |
| A(3-1-2)  | 125.46 |
| A(3-1-5)  | 96.08  |
| A(3-1-4)  | 110.03 |
| A(1-3-21) | 125.50 |
| A(2-1-5)  | 110.03 |
| A(2-1-4)  | 96.08  |
| A(1-2-20) | 125.50 |
| A(5-1-4)  | 121.42 |
| A(1-5-7)  | 120.40 |



|             |        |
|-------------|--------|
| A(1-5-9)    | 120.82 |
| A(1-4-8)    | 120.82 |
| A(1-4-6)    | 120.40 |
| A(2-20-10)  | 124.68 |
| A(2-20-18)  | 118.40 |
| A(3-21-11)  | 124.68 |
| A(3-21-19)  | 118.40 |
| A(8-4-6)    | 118.65 |
| A(4-8-10)   | 128.22 |
| A(4-8-28)   | 117.04 |
| A(4-6-22)   | 109.55 |
| A(4-6-24)   | 111.85 |
| A(4-6-26)   | 110.00 |
| A(7-5-9)    | 118.65 |
| A(5-7-25)   | 111.85 |
| A(5-7-27)   | 110.00 |
| A(5-7-23)   | 109.55 |
| A(5-9-11)   | 128.22 |
| A(5-9-29)   | 117.04 |
| A(22-6-24)  | 109.13 |
| A(22-6-26)  | 107.36 |
| A(24-6-26)  | 108.85 |
| A(25-7-27)  | 108.85 |
| A(25-7-23)  | 109.13 |
| A(27-7-23)  | 107.36 |
| A(10-8-28)  | 114.74 |
| A(8-10-12)  | 116.10 |
| A(8-10-20)  | 124.65 |
| A(11-9-29)  | 114.74 |
| A(9-11-13)  | 116.10 |
| A(9-11-21)  | 124.65 |
| A(12-10-20) | 119.25 |
| A(10-12-14) | 122.19 |
| A(10-12-30) | 117.93 |
| A(10-20-18) | 116.91 |
| A(13-11-21) | 119.25 |
| A(11-13-15) | 122.19 |
| A(11-13-31) | 117.93 |
| A(11-21-19) | 116.91 |
| A(14-12-30) | 119.87 |
| A(12-14-16) | 118.61 |
| A(12-14-32) | 120.73 |
| A(15-13-31) | 119.87 |
| A(13-15-17) | 118.61 |
| A(13-15-33) | 120.73 |
| A(16-14-32) | 120.66 |
| A(14-16-18) | 121.08 |
| A(14-16-34) | 119.59 |
| A(17-15-33) | 120.66 |
| A(15-17-19) | 121.08 |
| A(15-17-35) | 119.59 |
| A(18-16-34) | 119.33 |
| A(16-18-20) | 121.95 |
| A(16-18-36) | 121.33 |
| A(19-17-35) | 119.33 |
| A(17-19-21) | 121.95 |
| A(17-19-37) | 121.33 |
| A(20-18-36) | 116.73 |
| A(21-19-37) | 116.73 |

## Zn(salen)

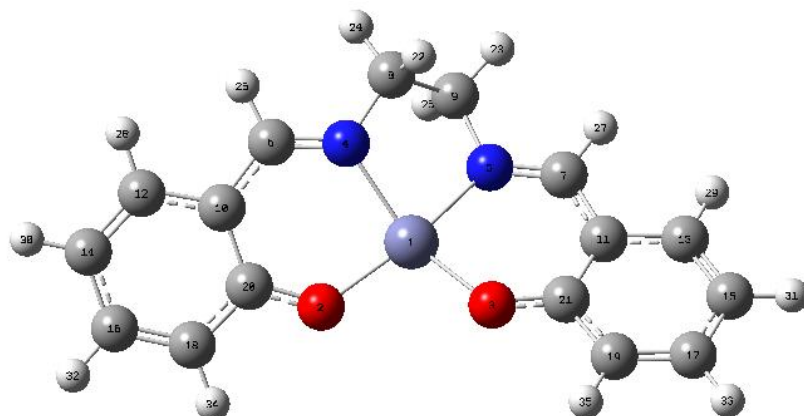

## Cartesian Coordinates

|    |    | X      | Y      | Z      |
|----|----|--------|--------|--------|
| 1  | Zn | 0.000  | 0.000  | 0.066  |
| 2  | O  | 0.522  | -1.475 | 1.224  |
| 3  | O  | -0.522 | 1.475  | 1.224  |
| 4  | N  | -0.403 | -1.275 | -1.506 |
| 5  | N  | 0.403  | 1.275  | -1.506 |
| 6  | C  | -0.294 | -2.573 | -1.450 |
| 7  | C  | 0.294  | 2.573  | -1.450 |
| 8  | C  | -0.516 | -0.578 | -2.780 |
| 9  | C  | 0.516  | 0.578  | -2.780 |
| 10 | C  | 0.000  | -3.341 | -0.275 |
| 11 | C  | 0.000  | 3.341  | -0.275 |
| 12 | C  | -0.054 | -4.758 | -0.404 |
| 13 | C  | 0.054  | 4.758  | -0.404 |
| 14 | C  | 0.258  | -5.603 | 0.645  |
| 15 | C  | -0.258 | 5.603  | 0.645  |
| 16 | C  | 0.663  | -5.035 | 1.875  |
| 17 | C  | -0.663 | 5.035  | 1.875  |
| 18 | C  | 0.749  | -3.663 | 2.037  |
| 19 | C  | -0.749 | 3.663  | 2.037  |
| 20 | C  | 0.416  | -2.755 | 0.986  |
| 21 | C  | -0.416 | 2.755  | 0.986  |
| 22 | H  | -1.529 | -0.148 | -2.872 |
| 23 | H  | 0.344  | 1.251  | -3.640 |
| 24 | H  | -0.344 | -1.251 | -3.640 |
| 25 | H  | 1.529  | 0.148  | -2.872 |
| 26 | H  | -0.412 | -3.152 | -2.386 |
| 27 | H  | 0.412  | 3.152  | -2.386 |
| 28 | H  | -0.359 | -5.174 | -1.370 |
| 29 | H  | 0.359  | 5.174  | -1.370 |
| 30 | H  | 0.201  | -6.686 | 0.525  |
| 31 | H  | -0.201 | 6.686  | 0.525  |
| 32 | H  | 0.917  | -5.690 | 2.714  |
| 33 | H  | -0.917 | 5.690  | 2.714  |
| 34 | H  | 1.066  | -3.221 | 2.984  |
| 35 | H  | -1.066 | 3.221  | 2.984  |

## Structural parameters

|            |        |
|------------|--------|
| R(1-5)     | 2.063  |
| R(1-4)     | 2.063  |
| R(1-3)     | 1.947  |
| R(1-2)     | 1.947  |
| R(2-20)    | 1.307  |
| R(3-21)    | 1.307  |
| R(4-8)     | 1.457  |
| R(4-6)     | 1.304  |
| R(5-7)     | 1.304  |
| R(5-9)     | 1.457  |
| R(6-10)    | 1.435  |
| R(6-26)    | 1.107  |
| R(7-11)    | 1.435  |
| R(7-27)    | 1.107  |
| R(8-9)     | 1.550  |
| R(8-24)    | 1.105  |
| R(8-22)    | 1.105  |
| R(9-25)    | 1.105  |
| R(9-23)    | 1.105  |
| R(10-20)   | 1.451  |
| R(10-12)   | 1.423  |
| R(11-21)   | 1.451  |
| R(11-13)   | 1.423  |
| R(12-14)   | 1.383  |
| R(12-28)   | 1.095  |
| R(13-15)   | 1.383  |
| R(13-29)   | 1.095  |
| R(14-16)   | 1.414  |
| R(14-30)   | 1.091  |
| R(15-17)   | 1.414  |
| R(15-31)   | 1.091  |
| R(16-18)   | 1.385  |
| R(16-32)   | 1.094  |
| R(17-19)   | 1.385  |
| R(17-33)   | 1.094  |
| R(18-20)   | 1.428  |
| R(18-34)   | 1.092  |
| R(19-21)   | 1.428  |
| R(19-35)   | 1.092  |
| A(5-1-4)   | 80.78  |
| A(5-1-3)   | 92.16  |
| A(5-1-2)   | 150.33 |
| A(1-5-7)   | 124.48 |
| A(1-5-9)   | 112.71 |
| A(4-1-3)   | 150.33 |
| A(4-1-2)   | 92.16  |
| A(1-4-8)   | 112.71 |
| A(1-4-6)   | 124.48 |
| A(3-1-2)   | 106.96 |
| A(1-3-21)  | 127.73 |
| A(1-2-20)  | 127.73 |
| A(2-20-10) | 125.29 |
| A(2-20-18) | 118.00 |
| A(3-21-11) | 125.29 |
| A(3-21-19) | 118.00 |

|             |        |
|-------------|--------|
| A(8-4-6)    | 121.33 |
| A(4-8-9)    | 107.78 |
| A(4-8-24)   | 112.18 |
| A(4-8-22)   | 109.24 |
| A(4-6-10)   | 125.82 |
| A(4-6-26)   | 118.40 |
| A(7-5-9)    | 121.33 |
| A(5-7-11)   | 125.82 |
| A(5-7-27)   | 118.40 |
| A(5-9-8)    | 107.78 |
| A(5-9-25)   | 109.24 |
| A(5-9-23)   | 112.18 |
| A(10-6-26)  | 115.76 |
| A(6-10-20)  | 123.66 |
| A(6-10-12)  | 116.80 |
| A(11-7-27)  | 115.76 |
| A(7-11-21)  | 123.66 |
| A(7-11-13)  | 116.80 |
| A(9-8-24)   | 110.54 |
| A(9-8-22)   | 108.65 |
| A(8-9-25)   | 108.65 |
| A(8-9-23)   | 110.54 |
| A(24-8-22)  | 108.38 |
| A(25-9-23)  | 108.38 |
| A(20-10-12) | 119.44 |
| A(10-20-18) | 116.71 |
| A(10-12-14) | 122.09 |
| A(10-12-28) | 117.94 |
| A(21-11-13) | 119.44 |
| A(11-21-19) | 116.71 |
| A(11-13-15) | 122.09 |
| A(11-13-29) | 117.94 |
| A(14-12-28) | 119.97 |
| A(12-14-16) | 118.61 |
| A(12-14-30) | 120.76 |
| A(15-13-29) | 119.97 |
| A(13-15-17) | 118.61 |
| A(13-15-31) | 120.76 |
| A(16-14-30) | 120.62 |
| A(14-16-18) | 121.14 |
| A(14-16-32) | 119.57 |
| A(17-15-31) | 120.62 |
| A(15-17-19) | 121.14 |
| A(15-17-33) | 119.57 |
| A(18-16-32) | 119.28 |
| A(16-18-20) | 121.98 |
| A(16-18-34) | 121.36 |
| A(19-17-33) | 119.28 |
| A(17-19-21) | 121.98 |
| A(17-19-35) | 121.36 |
| A(20-18-34) | 116.65 |
| A(21-19-35) | 116.65 |

## Complex 1

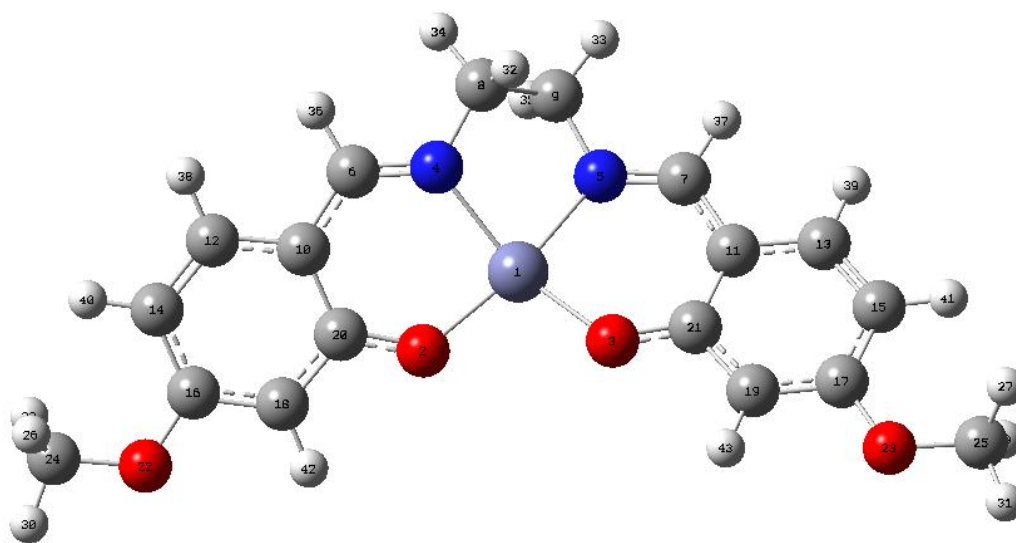

## Cartesian Coordinates

|    |    | X      | Y      | Z      |
|----|----|--------|--------|--------|
| 1  | Zn | 0.000  | 0.000  | 0.397  |
| 2  | O  | -0.455 | -1.497 | -0.762 |
| 3  | O  | 0.455  | 1.497  | -0.762 |
| 4  | N  | 0.479  | -1.248 | 1.967  |
| 5  | N  | -0.479 | 1.248  | 1.967  |
| 6  | C  | 0.425  | -2.551 | 1.912  |
| 7  | C  | -0.425 | 2.551  | 1.912  |
| 8  | C  | 0.550  | -0.547 | 3.241  |
| 9  | C  | -0.550 | 0.547  | 3.241  |
| 10 | C  | 0.162  | -3.330 | 0.741  |
| 11 | C  | -0.162 | 3.330  | 0.741  |
| 12 | C  | 0.274  | -4.739 | 0.866  |
| 13 | C  | -0.274 | 4.739  | 0.866  |
| 14 | C  | 0.000  | -5.612 | -0.173 |
| 15 | C  | 0.000  | 5.612  | -0.173 |
| 16 | C  | -0.433 | -5.064 | -1.409 |
| 17 | C  | 0.433  | 5.064  | -1.409 |
| 18 | C  | -0.579 | -3.688 | -1.568 |
| 19 | C  | 0.579  | 3.688  | -1.568 |
| 20 | C  | -0.287 | -2.772 | -0.527 |
| 21 | C  | 0.287  | 2.772  | -0.527 |
| 22 | O  | -0.739 | -5.823 | -2.504 |
| 23 | O  | 0.739  | 5.823  | -2.504 |
| 24 | C  | -0.604 | -7.241 | -2.405 |
| 25 | C  | 0.604  | 7.241  | -2.405 |
| 26 | H  | 0.438  | -7.535 | -2.191 |
| 27 | H  | 1.272  | 7.659  | -1.632 |
| 28 | H  | -1.272 | -7.659 | -1.632 |
| 29 | H  | -0.438 | 7.535  | -2.191 |
| 30 | H  | -0.896 | -7.634 | -3.387 |
| 31 | H  | 0.896  | 7.634  | -3.387 |
| 32 | H  | 1.535  | -0.055 | 3.335  |

|    |   |        |        |        |
|----|---|--------|--------|--------|
| 33 | H | -0.418 | 1.229  | 4.101  |
| 34 | H | 0.418  | -1.229 | 4.101  |
| 35 | H | -1.535 | 0.055  | 3.335  |
| 36 | H | 0.571  | -3.123 | 2.849  |
| 37 | H | -0.571 | 3.123  | 2.849  |
| 38 | H | 0.598  | -5.146 | 1.829  |
| 39 | H | -0.598 | 5.146  | 1.829  |
| 40 | H | 0.109  | -6.686 | -0.030 |
| 41 | H | -0.109 | 6.686  | -0.030 |
| 42 | H | -0.919 | -3.288 | -2.525 |
| 43 | H | 0.919  | 3.288  | -2.525 |

### Structural parameters

|          |       |
|----------|-------|
| R(1-2)   | 1.947 |
| R(1-5)   | 2.062 |
| R(1-4)   | 2.062 |
| R(1-3)   | 1.947 |
| R(2-20)  | 1.307 |
| R(3-21)  | 1.307 |
| R(4-8)   | 1.456 |
| R(4-6)   | 1.306 |
| R(5-7)   | 1.306 |
| R(5-9)   | 1.456 |
| R(6-10)  | 1.431 |
| R(6-36)  | 1.107 |
| R(7-11)  | 1.431 |
| R(7-37)  | 1.107 |
| R(8-9)   | 1.551 |
| R(8-34)  | 1.106 |
| R(8-32)  | 1.105 |
| R(9-35)  | 1.105 |
| R(9-33)  | 1.106 |
| R(10-20) | 1.457 |
| R(10-12) | 1.419 |
| R(11-21) | 1.457 |
| R(11-13) | 1.419 |
| R(12-14) | 1.384 |
| R(12-38) | 1.095 |
| R(13-15) | 1.384 |
| R(13-39) | 1.095 |
| R(14-16) | 1.420 |
| R(14-40) | 1.089 |
| R(15-17) | 1.420 |
| R(15-41) | 1.089 |
| R(16-18) | 1.393 |
| R(16-22) | 1.367 |
| R(17-19) | 1.393 |
| R(17-23) | 1.367 |
| R(18-20) | 1.417 |
| R(18-42) | 1.091 |
| R(19-21) | 1.417 |
| R(19-43) | 1.091 |
| R(22-24) | 1.429 |
| R(23-25) | 1.429 |
| R(24-30) | 1.097 |
| R(24-26) | 1.104 |
| R(24-28) | 1.104 |
| R(25-31) | 1.097 |

|             |        |
|-------------|--------|
| R(25-29)    | 1.104  |
| R(25-27)    | 1.104  |
| A(2-1-5)    | 149.78 |
| A(2-1-4)    | 92.44  |
| A(2-1-3)    | 106.94 |
| A(1-2-20)   | 127.76 |
| A(5-1-4)    | 80.80  |
| A(5-1-3)    | 92.44  |
| A(1-5-7)    | 124.20 |
| A(1-5-9)    | 112.74 |
| A(4-1-3)    | 149.78 |
| A(1-4-8)    | 112.74 |
| A(1-4-6)    | 124.20 |
| A(1-3-21)   | 127.76 |
| A(2-20-10)  | 124.79 |
| A(2-20-18)  | 118.13 |
| A(3-21-11)  | 124.79 |
| A(3-21-19)  | 118.13 |
| A(8-4-6)    | 121.30 |
| A(4-8-9)    | 107.77 |
| A(4-8-34)   | 112.18 |
| A(4-8-32)   | 109.37 |
| A(4-6-10)   | 125.87 |
| A(4-6-36)   | 118.31 |
| A(7-5-9)    | 121.30 |
| A(5-7-11)   | 125.87 |
| A(5-7-37)   | 118.31 |
| A(5-9-8)    | 107.77 |
| A(5-9-35)   | 109.37 |
| A(5-9-33)   | 112.18 |
| A(10-6-36)  | 115.80 |
| A(6-10-20)  | 124.05 |
| A(6-10-12)  | 117.05 |
| A(11-7-37)  | 115.80 |
| A(7-11-21)  | 124.05 |
| A(7-11-13)  | 117.05 |
| A(9-8-34)   | 110.54 |
| A(9-8-32)   | 108.58 |
| A(8-9-35)   | 108.58 |
| A(8-9-33)   | 110.54 |
| A(34-8-32)  | 108.35 |
| A(35-9-33)  | 108.35 |
| A(20-10-12) | 118.79 |
| A(10-20-18) | 117.07 |
| A(10-12-14) | 123.00 |
| A(10-12-38) | 117.99 |
| A(21-11-13) | 118.79 |
| A(11-21-19) | 117.07 |
| A(11-13-15) | 123.00 |
| A(11-13-39) | 117.99 |
| A(14-12-38) | 119.01 |
| A(12-14-16) | 118.05 |
| A(12-14-40) | 120.24 |
| A(15-13-39) | 119.01 |
| A(13-15-17) | 118.05 |
| A(13-15-41) | 120.24 |
| A(16-14-40) | 121.71 |
| A(14-16-18) | 120.87 |
| A(14-16-22) | 123.44 |
| A(17-15-41) | 121.71 |
| A(15-17-19) | 120.87 |

|             |        |
|-------------|--------|
| A(15-17-23) | 123.44 |
| A(18-16-22) | 115.69 |
| A(16-18-20) | 122.20 |
| A(16-18-42) | 119.67 |
| A(16-22-24) | 118.34 |
| A(19-17-23) | 115.69 |
| A(17-19-21) | 122.20 |
| A(17-19-43) | 119.67 |
| A(17-23-25) | 118.34 |
| A(20-18-42) | 118.13 |
| A(21-19-43) | 118.13 |
| A(22-24-30) | 105.52 |
| A(22-24-26) | 111.54 |
| A(22-24-28) | 111.52 |
| A(23-25-31) | 105.52 |
| A(23-25-29) | 111.54 |
| A(23-25-27) | 111.52 |
| A(30-24-26) | 109.29 |
| A(30-24-28) | 109.29 |
| A(26-24-28) | 109.57 |
| A(31-25-29) | 109.29 |
| A(31-25-27) | 109.29 |
| A(29-25-27) | 109.57 |

## Complex 2

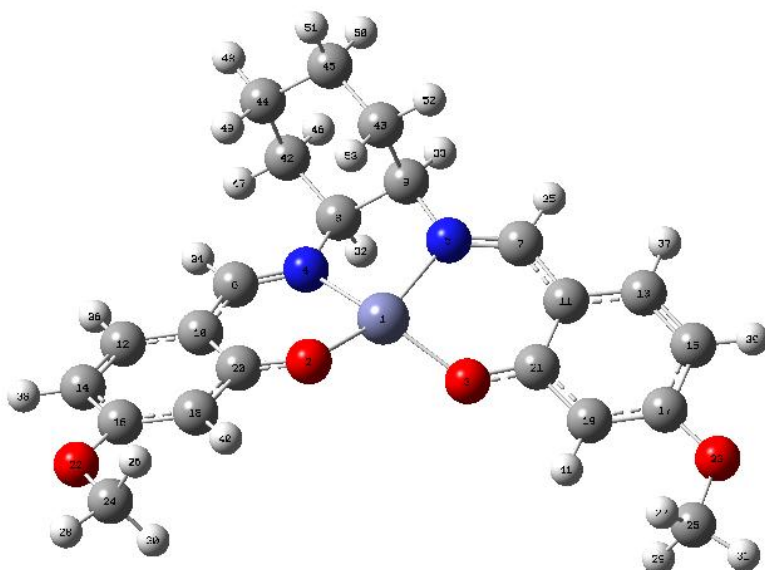

## Cartesian Coordinates

|   |    | X      | Y      | Z      |
|---|----|--------|--------|--------|
| 1 | Zn | 0.117  | 0.069  | -0.037 |
| 2 | O  | -1.235 | -1.229 | 0.455  |
| 3 | O  | 1.683  | -1.091 | -0.147 |
| 4 | N  | -1.277 | 1.410  | -0.686 |
| 5 | N  | 1.254  | 1.726  | 0.090  |
| 6 | C  | -2.539 | 1.120  | -0.871 |
| 7 | C  | 2.562  | 1.756  | 0.074  |
| 8 | C  | -0.696 | 2.728  | -0.980 |



|    |   |        |        |        |
|----|---|--------|--------|--------|
| 9  | C | 0.460  | 2.945  | 0.053  |
| 10 | C | -3.163 | -0.128 | -0.559 |
| 11 | C | 3.419  | 0.616  | 0.042  |
| 12 | C | -4.544 | -0.264 | -0.880 |
| 13 | C | 4.824  | 0.847  | 0.089  |
| 14 | C | -5.264 | -1.403 | -0.604 |
| 15 | C | 5.746  | -0.173 | 0.044  |
| 16 | C | -4.602 | -2.487 | 0.036  |
| 17 | C | 5.276  | -1.511 | -0.063 |
| 18 | C | -3.257 | -2.400 | 0.378  |
| 19 | C | 3.915  | -1.788 | -0.126 |
| 20 | C | -2.484 | -1.235 | 0.096  |
| 21 | C | 2.934  | -0.752 | -0.076 |
| 22 | O | -5.389 | -3.576 | 0.270  |
| 23 | O | 6.259  | -2.457 | -0.099 |
| 24 | C | -4.786 | -4.705 | 0.906  |
| 25 | C | 5.858  | -3.824 | -0.208 |
| 26 | H | -4.411 | -4.447 | 1.911  |
| 27 | H | 5.240  | -4.131 | 0.653  |
| 28 | H | -5.581 | -5.455 | 0.992  |
| 29 | H | 5.297  | -4.006 | -1.141 |
| 30 | H | -3.957 | -5.111 | 0.301  |
| 31 | H | 6.788  | -4.405 | -0.218 |
| 32 | H | -0.218 | 2.659  | -1.977 |
| 33 | H | 1.074  | 3.802  | -0.291 |
| 34 | H | -3.213 | 1.885  | -1.295 |
| 35 | H | 3.064  | 2.742  | 0.075  |
| 36 | H | -5.043 | 0.580  | -1.368 |
| 37 | H | 5.172  | 1.882  | 0.168  |
| 38 | H | -6.320 | -1.505 | -0.854 |
| 39 | H | 6.821  | 0.006  | 0.085  |
| 40 | H | -2.724 | -3.213 | 0.870  |
| 41 | H | 3.528  | -2.803 | -0.213 |
| 42 | C | -1.656 | 3.929  | -0.973 |
| 43 | C | -0.111 | 3.255  | 1.450  |
| 44 | C | -2.206 | 4.249  | 0.426  |
| 45 | C | -1.064 | 4.458  | 1.429  |
| 46 | H | -1.090 | 4.800  | -1.350 |
| 47 | H | -2.474 | 3.775  | -1.696 |
| 48 | H | -2.844 | 5.147  | 0.377  |
| 49 | H | -2.852 | 3.425  | 0.775  |
| 50 | H | -0.498 | 5.369  | 1.157  |
| 51 | H | -1.468 | 4.633  | 2.440  |
| 52 | H | 0.726  | 3.422  | 2.148  |
| 53 | H | -0.645 | 2.355  | 1.805  |

### Structural parameters

|         |       |
|---------|-------|
| R(1-2)  | 1.937 |
| R(1-4)  | 2.040 |
| R(1-5)  | 2.014 |
| R(1-3)  | 1.952 |
| R(2-20) | 1.300 |
| R(3-21) | 1.298 |
| R(4-6)  | 1.307 |
| R(4-8)  | 1.471 |
| R(5-9)  | 1.455 |
| R(5-7)  | 1.308 |

|           |        |
|-----------|--------|
| R(6-10)   | 1.430  |
| R(6-34)   | 1.104  |
| R(7-11)   | 1.427  |
| R(7-35)   | 1.107  |
| R(8-9)    | 1.566  |
| R(8-42)   | 1.537  |
| R(8-32)   | 1.108  |
| R(9-43)   | 1.541  |
| R(9-33)   | 1.109  |
| R(10-12)  | 1.425  |
| R(10-20)  | 1.454  |
| R(11-13)  | 1.424  |
| R(11-21)  | 1.456  |
| R(12-14)  | 1.376  |
| R(12-36)  | 1.095  |
| R(13-15)  | 1.376  |
| R(13-37)  | 1.095  |
| R(14-16)  | 1.422  |
| R(14-38)  | 1.090  |
| R(15-17)  | 1.422  |
| R(15-39)  | 1.090  |
| R(16-18)  | 1.390  |
| R(16-22)  | 1.364  |
| R(17-19)  | 1.390  |
| R(17-23)  | 1.365  |
| R(18-20)  | 1.426  |
| R(18-40)  | 1.090  |
| R(19-21)  | 1.427  |
| R(19-41)  | 1.090  |
| R(22-24)  | 1.429  |
| R(23-25)  | 1.429  |
| R(24-28)  | 1.097  |
| R(24-26)  | 1.104  |
| R(24-30)  | 1.103  |
| R(25-31)  | 1.097  |
| R(25-29)  | 1.104  |
| R(25-27)  | 1.104  |
| R(42-44)  | 1.536  |
| R(42-46)  | 1.105  |
| R(42-47)  | 1.103  |
| R(43-45)  | 1.535  |
| R(43-52)  | 1.102  |
| R(43-53)  | 1.105  |
| R(44-45)  | 1.535  |
| R(44-48)  | 1.102  |
| R(44-49)  | 1.104  |
| R(45-50)  | 1.106  |
| R(45-51)  | 1.102  |
| A(2-1-4)  | 92.56  |
| A(2-1-5)  | 158.34 |
| A(2-1-3)  | 100.13 |
| A(1-2-20) | 127.07 |
| A(4-1-5)  | 82.24  |
| A(4-1-3)  | 157.02 |
| A(1-4-6)  | 123.97 |
| A(1-4-8)  | 112.52 |
| A(5-1-3)  | 92.26  |
| A(1-5-9)  | 112.31 |
| A(1-5-7)  | 125.61 |

|             |        |
|-------------|--------|
| A(1-3-21)   | 127.96 |
| A(2-20-10)  | 124.75 |
| A(2-20-18)  | 117.98 |
| A(3-21-11)  | 124.80 |
| A(3-21-19)  | 118.10 |
| A(6-4-8)    | 123.46 |
| A(4-6-10)   | 125.71 |
| A(4-6-34)   | 119.36 |
| A(4-8-9)    | 106.49 |
| A(4-8-42)   | 116.91 |
| A(4-8-32)   | 107.15 |
| A(9-5-7)    | 121.76 |
| A(5-9-8)    | 107.68 |
| A(5-9-43)   | 110.35 |
| A(5-9-33)   | 110.68 |
| A(5-7-11)   | 125.67 |
| A(5-7-35)   | 118.28 |
| A(10-6-34)  | 114.93 |
| A(6-10-12)  | 117.23 |
| A(6-10-20)  | 123.97 |
| A(11-7-35)  | 116.04 |
| A(7-11-13)  | 117.54 |
| A(7-11-21)  | 123.51 |
| A(9-8-42)   | 110.48 |
| A(9-8-32)   | 106.47 |
| A(8-9-43)   | 110.64 |
| A(8-9-33)   | 108.12 |
| A(42-8-32)  | 108.82 |
| A(8-42-44)  | 112.98 |
| A(8-42-46)  | 107.11 |
| A(8-42-47)  | 110.54 |
| A(43-9-33)  | 109.34 |
| A(9-43-45)  | 112.06 |
| A(9-43-52)  | 108.89 |
| A(9-43-53)  | 107.88 |
| A(12-10-20) | 118.77 |
| A(10-12-14) | 122.75 |
| A(10-12-36) | 117.93 |
| A(10-20-18) | 117.26 |
| A(13-11-21) | 118.92 |
| A(11-13-15) | 122.67 |
| A(11-13-37) | 117.97 |
| A(11-21-19) | 117.10 |
| A(14-12-36) | 119.32 |
| A(12-14-16) | 118.56 |
| A(12-14-38) | 122.51 |
| A(15-13-37) | 119.37 |
| A(13-15-17) | 118.57 |
| A(13-15-39) | 122.52 |
| A(16-14-38) | 118.93 |
| A(14-16-18) | 120.88 |
| A(14-16-22) | 114.63 |
| A(17-15-39) | 118.91 |
| A(15-17-19) | 120.96 |
| A(15-17-23) | 114.58 |
| A(18-16-22) | 124.48 |
| A(16-18-20) | 121.77 |
| A(16-18-40) | 122.47 |
| A(16-22-24) | 117.60 |

|             |        |
|-------------|--------|
| A(19-17-23) | 124.46 |
| A(17-19-21) | 121.78 |
| A(17-19-41) | 122.45 |
| A(17-23-25) | 117.59 |
| A(20-18-40) | 115.76 |
| A(21-19-41) | 115.77 |
| A(22-24-28) | 105.65 |
| A(22-24-26) | 111.41 |
| A(22-24-30) | 111.36 |
| A(23-25-31) | 105.66 |
| A(23-25-29) | 111.37 |
| A(23-25-27) | 111.36 |
| A(28-24-26) | 109.56 |
| A(28-24-30) | 109.57 |
| A(26-24-30) | 109.23 |
| A(31-25-29) | 109.58 |
| A(31-25-27) | 109.58 |
| A(29-25-27) | 109.22 |
| A(44-42-46) | 109.25 |
| A(44-42-47) | 111.15 |
| A(42-44-45) | 110.95 |
| A(42-44-48) | 109.67 |
| A(42-44-49) | 109.99 |
| A(46-42-47) | 105.45 |
| A(45-43-52) | 111.13 |
| A(45-43-53) | 110.00 |
| A(43-45-44) | 111.34 |
| A(43-45-50) | 109.35 |
| A(43-45-51) | 109.86 |
| A(52-43-53) | 106.67 |
| A(45-44-48) | 110.39 |
| A(45-44-49) | 109.27 |
| A(44-45-50) | 109.35 |
| A(44-45-51) | 110.39 |
| A(48-44-49) | 106.48 |
| A(50-45-51) | 106.42 |

### Complex 3

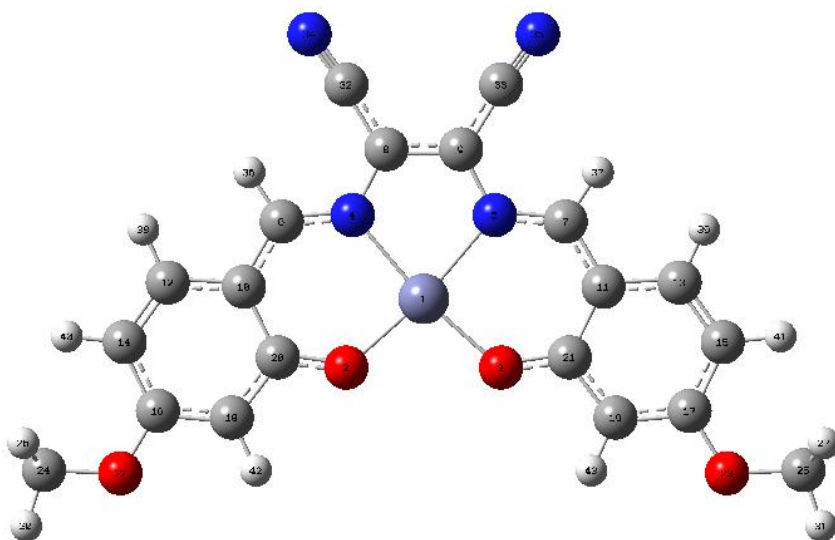

### Cartesian coordinate

|    |    | X      | Y      | Z      |
|----|----|--------|--------|--------|
| 1  | Zn | 0.000  | 0.040  | -0.001 |
| 2  | O  | -1.449 | -1.246 | -0.001 |
| 3  | O  | 1.449  | -1.246 | 0.000  |
| 4  | N  | -1.331 | 1.608  | 0.000  |
| 5  | N  | 1.331  | 1.608  | 0.000  |
| 6  | C  | -2.656 | 1.488  | 0.000  |
| 7  | C  | 2.656  | 1.488  | -0.001 |
| 8  | C  | -0.700 | 2.839  | 0.000  |
| 9  | C  | 0.700  | 2.839  | 0.000  |
| 10 | C  | -3.363 | 0.267  | -0.001 |
| 11 | C  | 3.364  | 0.267  | -0.001 |
| 12 | C  | -4.788 | 0.345  | 0.000  |
| 13 | C  | 4.789  | 0.345  | -0.001 |
| 14 | C  | -5.594 | -0.771 | 0.000  |
| 15 | C  | 5.594  | -0.771 | 0.000  |
| 16 | C  | -4.975 | -2.057 | 0.000  |
| 17 | C  | 4.975  | -2.057 | 0.000  |
| 18 | C  | -3.590 | -2.183 | 0.000  |
| 19 | C  | 3.590  | -2.183 | 0.001  |
| 20 | C  | -2.730 | -1.055 | -0.001 |
| 21 | C  | 2.730  | -1.055 | 0.000  |
| 22 | O  | -5.676 | -3.223 | 0.001  |
| 23 | O  | 5.676  | -3.223 | 0.001  |
| 24 | C  | -7.106 | -3.165 | 0.001  |
| 25 | C  | 7.106  | -3.165 | 0.001  |
| 26 | H  | -7.490 | -2.659 | 0.903  |
| 27 | H  | 7.490  | -2.659 | 0.902  |
| 28 | H  | -7.490 | -2.659 | -0.901 |
| 29 | H  | 7.490  | -2.660 | -0.902 |
| 30 | H  | -7.439 | -4.209 | 0.001  |
| 31 | H  | 7.439  | -4.209 | 0.001  |
| 32 | C  | -1.448 | 4.049  | 0.001  |
| 33 | C  | 1.449  | 4.049  | 0.001  |

|    |   |        |        |        |
|----|---|--------|--------|--------|
| 34 | N | -2.137 | 4.996  | 0.001  |
| 35 | N | 2.137  | 4.996  | 0.001  |
| 36 | H | -3.261 | 2.410  | 0.000  |
| 37 | H | 3.261  | 2.410  | -0.001 |
| 38 | H | -5.247 | 1.338  | 0.000  |
| 39 | H | 5.247  | 1.338  | -0.001 |
| 40 | H | -6.678 | -0.663 | 0.000  |
| 41 | H | 6.678  | -0.664 | -0.001 |
| 42 | H | -3.138 | -3.175 | 0.000  |
| 43 | H | 3.138  | -3.175 | 0.001  |

### Structural parameters

|          |       |
|----------|-------|
| R(1-2)   | 1.937 |
| R(1-3)   | 1.937 |
| R(1-4)   | 2.057 |
| R(1-5)   | 2.057 |
| R(2-20)  | 1.296 |
| R(3-21)  | 1.296 |
| R(4-6)   | 1.331 |
| R(4-8)   | 1.383 |
| R(5-7)   | 1.331 |
| R(5-9)   | 1.383 |
| R(6-10)  | 1.411 |
| R(6-36)  | 1.102 |
| R(7-11)  | 1.411 |
| R(7-37)  | 1.102 |
| R(8-9)   | 1.400 |
| R(8-32)  | 1.423 |
| R(9-33)  | 1.423 |
| R(10-12) | 1.427 |
| R(10-20) | 1.466 |
| R(11-13) | 1.427 |
| R(11-21) | 1.466 |
| R(12-14) | 1.376 |
| R(12-38) | 1.094 |
| R(13-15) | 1.376 |
| R(13-39) | 1.094 |
| R(14-16) | 1.427 |
| R(14-40) | 1.089 |
| R(15-17) | 1.427 |
| R(15-41) | 1.089 |
| R(16-18) | 1.391 |
| R(16-22) | 1.360 |
| R(17-19) | 1.391 |
| R(17-23) | 1.360 |
| R(18-20) | 1.417 |
| R(18-42) | 1.090 |
| R(19-21) | 1.418 |
| R(19-43) | 1.090 |
| R(22-24) | 1.431 |
| R(23-25) | 1.431 |
| R(24-28) | 1.103 |
| R(24-30) | 1.096 |
| R(24-26) | 1.103 |
| R(25-31) | 1.096 |
| R(25-29) | 1.103 |
| R(25-27) | 1.103 |

|             |        |
|-------------|--------|
| R(32-34)    | 1.171  |
| R(33-35)    | 1.171  |
| A(2-1-3)    | 96.79  |
| A(2-1-4)    | 91.29  |
| A(2-1-5)    | 171.94 |
| A(1-2-20)   | 129.91 |
| A(3-1-4)    | 171.92 |
| A(3-1-5)    | 91.27  |
| A(1-3-21)   | 129.93 |
| A(4-1-5)    | 80.66  |
| A(1-4-6)    | 125.14 |
| A(1-4-8)    | 112.51 |
| A(1-5-7)    | 125.15 |
| A(1-5-9)    | 112.51 |
| A(2-20-10)  | 124.06 |
| A(2-20-18)  | 118.85 |
| A(3-21-11)  | 124.06 |
| A(3-21-19)  | 118.85 |
| A(6-4-8)    | 122.35 |
| A(4-6-10)   | 125.24 |
| A(4-6-36)   | 118.08 |
| A(4-8-9)    | 117.17 |
| A(4-8-32)   | 121.08 |
| A(7-5-9)    | 122.34 |
| A(5-7-11)   | 125.24 |
| A(5-7-37)   | 118.08 |
| A(5-9-8)    | 117.16 |
| A(5-9-33)   | 121.09 |
| A(10-6-36)  | 116.68 |
| A(6-10-12)  | 116.92 |
| A(6-10-20)  | 124.35 |
| A(11-7-37)  | 116.68 |
| A(7-11-13)  | 116.92 |
| A(7-11-21)  | 124.34 |
| A(9-8-32)   | 121.75 |
| A(8-9-33)   | 121.75 |
| A(8-32-34)  | 175.73 |
| A(9-33-35)  | 175.73 |
| A(12-10-20) | 118.73 |
| A(10-12-14) | 122.69 |
| A(10-12-38) | 117.94 |
| A(10-20-18) | 117.09 |
| A(13-11-21) | 118.73 |
| A(11-13-15) | 122.68 |
| A(11-13-39) | 117.94 |
| A(11-21-19) | 117.09 |
| A(14-12-38) | 119.38 |
| A(12-14-16) | 118.49 |
| A(12-14-40) | 120.16 |
| A(15-13-39) | 119.38 |
| A(13-15-17) | 118.49 |
| A(13-15-41) | 120.16 |
| A(16-14-40) | 121.35 |
| A(14-16-18) | 120.85 |
| A(14-16-22) | 123.32 |
| A(17-15-41) | 121.35 |
| A(15-17-19) | 120.85 |
| A(15-17-23) | 123.32 |

|             |        |
|-------------|--------|
| A(18-16-22) | 115.83 |
| A(16-18-20) | 122.16 |
| A(16-18-42) | 119.67 |
| A(16-22-24) | 118.67 |
| A(19-17-23) | 115.83 |
| A(17-19-21) | 122.16 |
| A(17-19-43) | 119.67 |
| A(17-23-25) | 118.66 |
| A(20-18-42) | 118.17 |
| A(21-19-43) | 118.17 |
| A(22-24-28) | 111.52 |
| A(22-24-30) | 105.35 |
| A(22-24-26) | 111.52 |
| A(23-25-31) | 105.35 |
| A(23-25-29) | 111.52 |
| A(23-25-27) | 111.53 |
| A(28-24-30) | 109.31 |
| A(28-24-26) | 109.72 |
| A(30-24-26) | 109.30 |
| A(31-25-29) | 109.30 |
| A(31-25-27) | 109.31 |
| A(29-25-27) | 109.72 |

#### Complex 4

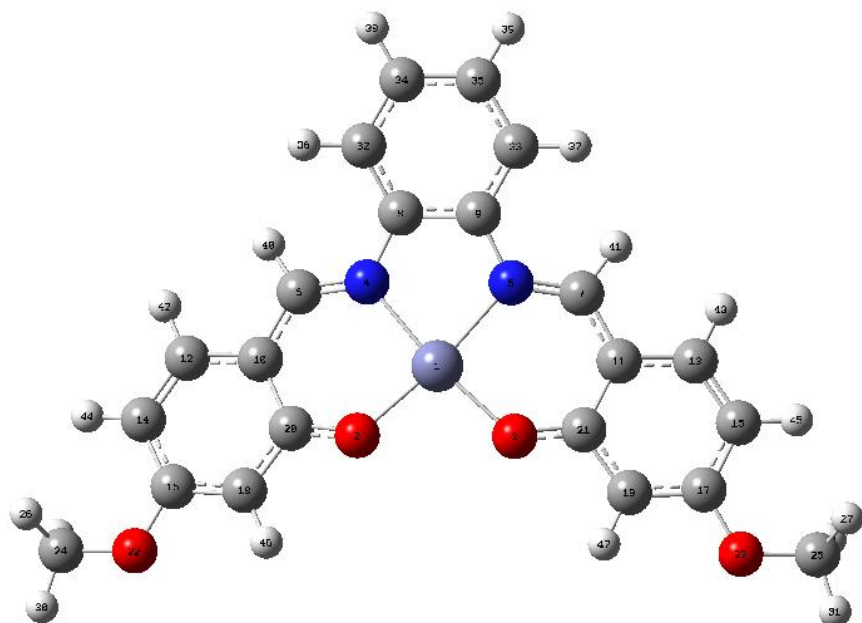

#### Cartesian coordinates

|   |    | X      | Y      | Z      |
|---|----|--------|--------|--------|
| 1 | Zn | 0.061  | -0.353 | 0.000  |
| 2 | O  | -1.217 | -0.593 | 1.445  |
| 3 | O  | -1.217 | -0.593 | -1.445 |
| 4 | N  | 1.589  | -0.036 | 1.323  |
| 5 | N  | 1.589  | -0.036 | -1.323 |



|    |   |        |        |        |
|----|---|--------|--------|--------|
| 6  | C | 1.400  | 0.262  | 2.595  |
| 7  | C | 1.400  | 0.262  | -2.595 |
| 8  | C | 2.852  | -0.010 | 0.716  |
| 9  | C | 2.852  | -0.010 | -0.716 |
| 10 | C | 0.167  | 0.182  | 3.295  |
| 11 | C | 0.167  | 0.182  | -3.295 |
| 12 | C | 0.175  | 0.551  | 4.669  |
| 13 | C | 0.175  | 0.551  | -4.669 |
| 14 | C | -0.951 | 0.501  | 5.464  |
| 15 | C | -0.951 | 0.501  | -5.464 |
| 16 | C | -2.173 | 0.067  | 4.876  |
| 17 | C | -2.173 | 0.067  | -4.876 |
| 18 | C | -2.231 | -0.293 | 3.534  |
| 19 | C | -2.231 | -0.293 | -3.534 |
| 20 | C | -1.091 | -0.249 | 2.689  |
| 21 | C | -1.091 | -0.249 | -2.689 |
| 22 | O | -3.348 | -0.023 | 5.565  |
| 23 | O | -3.348 | -0.023 | -5.565 |
| 24 | C | -3.353 | 0.339  | 6.947  |
| 25 | C | -3.353 | 0.339  | -6.947 |
| 26 | H | -2.681 | -0.305 | 7.540  |
| 27 | H | -2.681 | -0.305 | -7.540 |
| 28 | H | -3.072 | 1.397  | 7.092  |
| 29 | H | -3.072 | 1.397  | -7.092 |
| 30 | H | -4.386 | 0.191  | 7.284  |
| 31 | H | -4.386 | 0.191  | -7.284 |
| 32 | C | 4.081  | -0.037 | 1.401  |
| 33 | C | 4.081  | -0.037 | -1.401 |
| 34 | C | 5.288  | -0.036 | 0.701  |
| 35 | C | 5.288  | -0.036 | -0.701 |
| 36 | H | 4.092  | -0.086 | 2.492  |
| 37 | H | 4.092  | -0.086 | -2.492 |
| 38 | H | 6.231  | -0.061 | 1.250  |
| 39 | H | 6.231  | -0.061 | -1.250 |
| 40 | H | 2.259  | 0.620  | 3.187  |
| 41 | H | 2.259  | 0.620  | -3.187 |
| 42 | H | 1.124  | 0.878  | 5.108  |
| 43 | H | 1.124  | 0.878  | -5.108 |
| 44 | H | -0.895 | 0.788  | 6.513  |
| 45 | H | -0.895 | 0.788  | -6.513 |
| 46 | H | -3.178 | -0.616 | 3.101  |
| 47 | H | -3.178 | -0.616 | -3.101 |

### Structural parameters

|         |       |
|---------|-------|
| R(1-2)  | 1.944 |
| R(1-3)  | 1.944 |
| R(1-4)  | 2.046 |
| R(1-5)  | 2.046 |
| R(2-20) | 1.297 |
| R(3-21) | 1.297 |
| R(4-6)  | 1.319 |
| R(4-8)  | 1.401 |
| R(5-9)  | 1.401 |
| R(5-7)  | 1.319 |
| R(6-10) | 1.420 |
| R(6-40) | 1.103 |
| R(7-11) | 1.420 |

|            |        |
|------------|--------|
| R(7-41)    | 1.103  |
| R(8-9)     | 1.432  |
| R(8-32)    | 1.407  |
| R(9-33)    | 1.407  |
| R(10-20)   | 1.462  |
| R(10-12)   | 1.423  |
| R(11-13)   | 1.423  |
| R(11-21)   | 1.462  |
| R(12-14)   | 1.380  |
| R(12-42)   | 1.095  |
| R(13-15)   | 1.380  |
| R(13-43)   | 1.095  |
| R(14-16)   | 1.424  |
| R(14-44)   | 1.089  |
| R(15-17)   | 1.424  |
| R(15-45)   | 1.089  |
| R(16-18)   | 1.391  |
| R(16-22)   | 1.364  |
| R(17-19)   | 1.391  |
| R(17-23)   | 1.364  |
| R(18-20)   | 1.419  |
| R(18-46)   | 1.091  |
| R(19-21)   | 1.419  |
| R(19-47)   | 1.091  |
| R(22-24)   | 1.429  |
| R(23-25)   | 1.429  |
| R(24-28)   | 1.104  |
| R(24-30)   | 1.097  |
| R(24-26)   | 1.104  |
| R(25-31)   | 1.097  |
| R(25-29)   | 1.104  |
| R(25-27)   | 1.104  |
| R(32-34)   | 1.395  |
| R(32-36)   | 1.092  |
| R(33-35)   | 1.395  |
| R(33-37)   | 1.092  |
| R(34-35)   | 1.402  |
| R(34-38)   | 1.092  |
| R(35-39)   | 1.092  |
| A(2-1-3)   | 96.05  |
| A(2-1-4)   | 91.68  |
| A(2-1-5)   | 172.23 |
| A(1-2-20)  | 128.08 |
| A(3-1-4)   | 172.23 |
| A(3-1-5)   | 91.68  |
| A(1-3-21)  | 128.08 |
| A(4-1-5)   | 80.58  |
| A(1-4-6)   | 123.43 |
| A(1-4-8)   | 113.30 |
| A(1-5-9)   | 113.30 |
| A(1-5-7)   | 123.43 |
| A(2-20-10) | 124.01 |
| A(2-20-18) | 119.00 |
| A(3-21-11) | 124.01 |
| A(3-21-19) | 119.00 |
| A(6-4-8)   | 122.87 |
| A(4-6-10)  | 125.96 |
| A(4-6-40)  | 118.60 |

|             |        |
|-------------|--------|
| A(4-8-9)    | 115.67 |
| A(4-8-32)   | 125.16 |
| A(9-5-7)    | 122.87 |
| A(5-9-8)    | 115.67 |
| A(5-9-33)   | 125.16 |
| A(5-7-11)   | 125.96 |
| A(5-7-41)   | 118.60 |
| A(10-6-40)  | 115.43 |
| A(6-10-20)  | 124.01 |
| A(6-10-12)  | 117.20 |
| A(11-7-41)  | 115.43 |
| A(7-11-13)  | 117.20 |
| A(7-11-21)  | 124.01 |
| A(9-8-32)   | 119.12 |
| A(8-9-33)   | 119.12 |
| A(8-32-34)  | 120.76 |
| A(8-32-36)  | 119.75 |
| A(9-33-35)  | 120.76 |
| A(9-33-37)  | 119.75 |
| A(20-10-12) | 118.79 |
| A(10-20-18) | 116.98 |
| A(10-12-14) | 122.87 |
| A(10-12-42) | 117.96 |
| A(13-11-21) | 118.79 |
| A(11-13-15) | 122.87 |
| A(11-13-43) | 117.96 |
| A(11-21-19) | 116.98 |
| A(14-12-42) | 119.16 |
| A(12-14-16) | 118.27 |
| A(12-14-44) | 120.25 |
| A(15-13-43) | 119.16 |
| A(13-15-17) | 118.27 |
| A(13-15-45) | 120.25 |
| A(16-14-44) | 121.48 |
| A(14-16-18) | 120.85 |
| A(14-16-22) | 123.37 |
| A(17-15-45) | 121.48 |
| A(15-17-19) | 120.85 |
| A(15-17-23) | 123.37 |
| A(18-16-22) | 115.78 |
| A(16-18-20) | 122.23 |
| A(16-18-46) | 119.66 |
| A(16-22-24) | 118.38 |
| A(19-17-23) | 115.78 |
| A(17-19-21) | 122.23 |
| A(17-19-47) | 119.66 |
| A(17-23-25) | 118.38 |
| A(20-18-46) | 118.11 |
| A(21-19-47) | 118.11 |
| A(22-24-28) | 111.63 |
| A(22-24-30) | 105.48 |
| A(22-24-26) | 111.65 |
| A(23-25-31) | 105.48 |
| A(23-25-29) | 111.63 |
| A(23-25-27) | 111.65 |
| A(28-24-30) | 109.25 |
| A(28-24-26) | 109.49 |
| A(30-24-26) | 109.24 |

|             |        |
|-------------|--------|
| A(31-25-29) | 109.25 |
| A(31-25-27) | 109.24 |
| A(29-25-27) | 109.49 |
| A(34-32-36) | 119.47 |
| A(32-34-35) | 120.11 |
| A(32-34-38) | 119.71 |
| A(35-33-37) | 119.47 |
| A(33-35-34) | 120.11 |
| A(33-35-39) | 119.71 |
| A(35-34-38) | 120.17 |
| A(34-35-39) | 120.17 |

### Complex 5

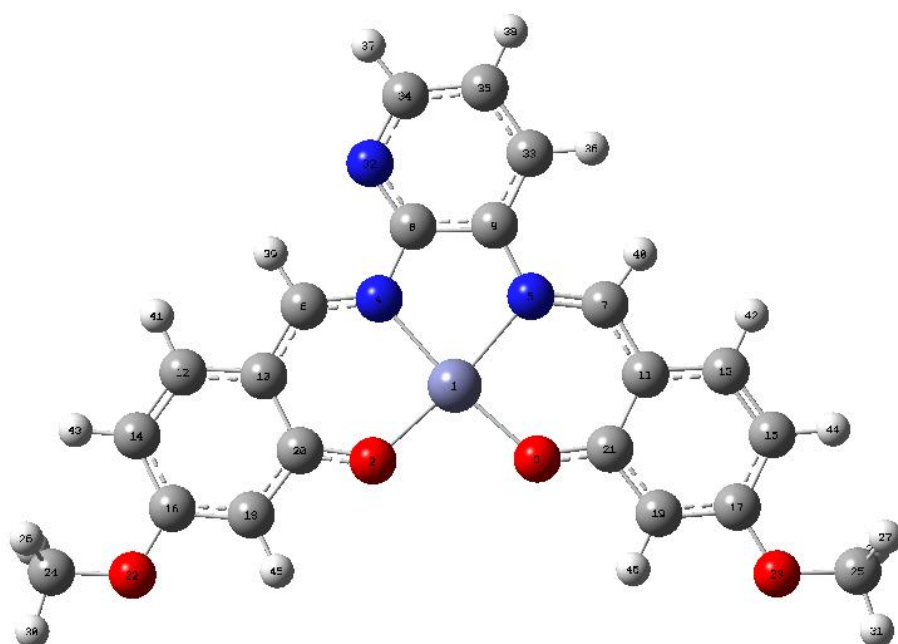

### Cartesian coordinates

|    |    | X      | Y      | Z      |
|----|----|--------|--------|--------|
| 1  | Zn | -0.010 | 0.009  | -0.130 |
| 2  | O  | 1.423  | -1.315 | -0.184 |
| 3  | O  | -1.459 | -1.278 | -0.244 |
| 4  | N  | 1.316  | 1.536  | 0.008  |
| 5  | N  | -1.342 | 1.582  | -0.049 |
| 6  | C  | 2.632  | 1.404  | 0.087  |
| 7  | C  | -2.649 | 1.443  | 0.082  |
| 8  | C  | 0.727  | 2.805  | 0.014  |
| 9  | C  | -0.707 | 2.830  | -0.029 |
| 10 | C  | 3.337  | 0.178  | 0.062  |
| 11 | C  | -3.362 | 0.217  | 0.054  |
| 12 | C  | 4.755  | 0.244  | 0.175  |
| 13 | C  | -4.776 | 0.286  | 0.206  |
| 14 | C  | 5.560  | -0.875 | 0.162  |
| 15 | C  | -5.585 | -0.830 | 0.195  |
| 16 | C  | 4.939  | -2.152 | 0.029  |

|    |   |        |        |        |
|----|---|--------|--------|--------|
| 17 | C | -4.974 | -2.106 | 0.027  |
| 18 | C | 3.558  | -2.266 | -0.084 |
| 19 | C | -3.595 | -2.223 | -0.118 |
| 20 | C | 2.701  | -1.135 | -0.073 |
| 21 | C | -2.735 | -1.094 | -0.109 |
| 22 | O | 5.636  | -3.324 | 0.005  |
| 23 | O | -5.674 | -3.276 | 0.000  |
| 24 | C | 7.060  | -3.272 | 0.119  |
| 25 | C | -7.094 | -3.221 | 0.151  |
| 26 | H | 7.515  | -2.710 | -0.715 |
| 27 | H | -7.568 | -2.645 | -0.663 |
| 28 | H | 7.374  | -2.826 | 1.078  |
| 29 | H | -7.384 | -2.790 | 1.125  |
| 30 | H | 7.394  | -4.315 | 0.078  |
| 31 | H | -7.434 | -4.263 | 0.101  |
| 32 | N | 1.481  | 3.912  | 0.044  |
| 33 | C | -1.321 | 4.091  | -0.067 |
| 34 | C | 0.861  | 5.100  | 0.028  |
| 35 | C | -0.531 | 5.241  | -0.034 |
| 36 | H | -2.408 | 4.180  | -0.133 |
| 37 | H | 1.511  | 5.981  | 0.056  |
| 38 | H | -0.984 | 6.234  | -0.064 |
| 39 | H | 3.218  | 2.332  | 0.178  |
| 40 | H | -3.268 | 2.342  | 0.238  |
| 41 | H | 5.213  | 1.233  | 0.275  |
| 42 | H | -5.231 | 1.274  | 0.333  |
| 43 | H | 6.640  | -0.775 | 0.251  |
| 44 | H | -6.663 | -0.728 | 0.312  |
| 45 | H | 3.105  | -3.253 | -0.185 |
| 46 | H | -3.147 | -3.209 | -0.241 |

### Structural parameters

|          |       |
|----------|-------|
| R(1-2)   | 1.951 |
| R(1-3)   | 1.942 |
| R(1-4)   | 2.027 |
| R(1-5)   | 2.063 |
| R(2-20)  | 1.295 |
| R(3-21)  | 1.296 |
| R(4-6)   | 1.325 |
| R(4-8)   | 1.399 |
| R(5-9)   | 1.400 |
| R(5-7)   | 1.321 |
| R(6-10)  | 1.415 |
| R(6-39)  | 1.101 |
| R(7-11)  | 1.418 |
| R(7-40)  | 1.103 |
| R(8-9)   | 1.434 |
| R(8-32)  | 1.340 |
| R(9-33)  | 1.404 |
| R(10-20) | 1.464 |
| R(10-12) | 1.425 |
| R(11-13) | 1.424 |
| R(11-21) | 1.463 |
| R(12-14) | 1.378 |
| R(12-41) | 1.094 |
| R(13-15) | 1.379 |
| R(13-42) | 1.095 |

|            |        |
|------------|--------|
| R(14-16)   | 1.425  |
| R(14-43)   | 1.089  |
| R(15-17)   | 1.425  |
| R(15-44)   | 1.089  |
| R(16-18)   | 1.391  |
| R(16-22)   | 1.364  |
| R(17-19)   | 1.391  |
| R(17-23)   | 1.364  |
| R(18-20)   | 1.420  |
| R(18-45)   | 1.091  |
| R(19-21)   | 1.419  |
| R(19-46)   | 1.091  |
| R(22-24)   | 1.429  |
| R(23-25)   | 1.429  |
| R(24-28)   | 1.104  |
| R(24-30)   | 1.097  |
| R(24-26)   | 1.104  |
| R(25-31)   | 1.097  |
| R(25-29)   | 1.104  |
| R(25-27)   | 1.104  |
| R(32-34)   | 1.340  |
| R(33-35)   | 1.396  |
| R(33-36)   | 1.092  |
| R(34-35)   | 1.400  |
| R(34-37)   | 1.095  |
| R(35-38)   | 1.092  |
| A(2-1-3)   | 95.56  |
| A(2-1-4)   | 91.88  |
| A(2-1-5)   | 172.97 |
| A(1-2-20)  | 128.86 |
| A(3-1-4)   | 172.56 |
| A(3-1-5)   | 91.46  |
| A(1-3-21)  | 129.38 |
| A(4-1-5)   | 81.10  |
| A(1-4-6)   | 125.38 |
| A(1-4-8)   | 114.06 |
| A(1-5-9)   | 112.76 |
| A(1-5-7)   | 124.23 |
| A(2-20-10) | 124.13 |
| A(2-20-18) | 118.92 |
| A(3-21-11) | 124.14 |
| A(3-21-19) | 118.89 |
| A(6-4-8)   | 120.55 |
| A(4-6-10)  | 125.42 |
| A(4-6-39)  | 116.74 |
| A(4-8-9)   | 115.90 |
| A(4-8-32)  | 120.82 |
| A(9-5-7)   | 122.79 |
| A(5-9-8)   | 116.01 |
| A(5-9-33)  | 126.99 |
| A(5-7-11)  | 125.92 |
| A(5-7-40)  | 118.94 |
| A(10-6-39) | 117.83 |
| A(6-10-20) | 124.22 |
| A(6-10-12) | 116.99 |
| A(11-7-40) | 115.14 |
| A(7-11-13) | 117.11 |
| A(7-11-21) | 124.14 |

|             |        |
|-------------|--------|
| A(9-8-32)   | 123.28 |
| A(8-9-33)   | 117.00 |
| A(8-32-34)  | 118.18 |
| A(9-33-35)  | 119.45 |
| A(9-33-36)  | 120.69 |
| A(20-10-12) | 118.79 |
| A(10-20-18) | 116.95 |
| A(10-12-14) | 122.83 |
| A(10-12-41) | 117.80 |
| A(13-11-21) | 118.75 |
| A(11-13-15) | 122.89 |
| A(11-13-42) | 117.96 |
| A(11-21-19) | 116.97 |
| A(14-12-41) | 119.37 |
| A(12-14-16) | 118.31 |
| A(12-14-43) | 120.25 |
| A(15-13-42) | 119.15 |
| A(13-15-17) | 118.29 |
| A(13-15-44) | 120.25 |
| A(16-14-43) | 121.44 |
| A(14-16-18) | 120.92 |
| A(14-16-22) | 123.30 |
| A(17-15-44) | 121.47 |
| A(15-17-19) | 120.84 |
| A(15-17-23) | 123.34 |
| A(18-16-22) | 115.78 |
| A(16-18-20) | 122.20 |
| A(16-18-45) | 119.66 |
| A(16-22-24) | 118.43 |
| A(19-17-23) | 115.82 |
| A(17-19-21) | 122.25 |
| A(17-19-46) | 119.67 |
| A(17-23-25) | 118.42 |
| A(20-18-45) | 118.14 |
| A(21-19-46) | 118.08 |
| A(22-24-28) | 111.62 |
| A(22-24-30) | 105.45 |
| A(22-24-26) | 111.64 |
| A(23-25-31) | 105.45 |
| A(23-25-29) | 111.61 |
| A(23-25-27) | 111.63 |
| A(28-24-30) | 109.26 |
| A(28-24-26) | 109.53 |
| A(30-24-26) | 109.24 |
| A(31-25-29) | 109.25 |
| A(31-25-27) | 109.24 |
| A(29-25-27) | 109.55 |
| A(32-34-35) | 123.32 |
| A(32-34-37) | 116.03 |
| A(35-33-36) | 119.86 |
| A(33-35-34) | 118.75 |
| A(33-35-38) | 120.85 |
| A(35-34-37) | 120.65 |
| A(34-35-38) | 120.40 |

## Complex 6

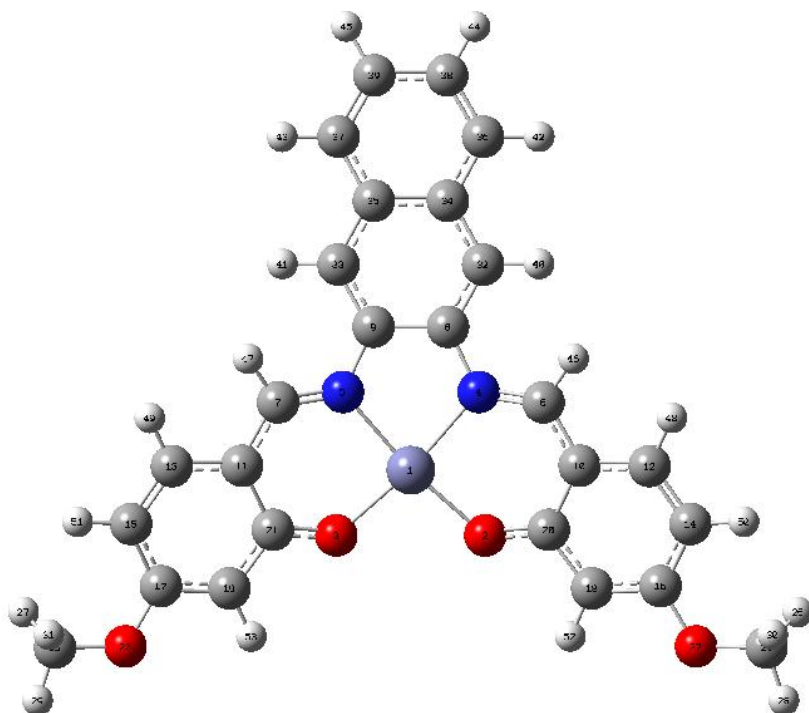

## Cartesian coordinates

|    |    | X      | Y      | Z      |
|----|----|--------|--------|--------|
| 1  | Zn | 0.000  | -0.679 | -0.381 |
| 2  | O  | 1.448  | -1.948 | -0.649 |
| 3  | O  | -1.448 | -1.948 | -0.649 |
| 4  | N  | 1.321  | 0.841  | -0.025 |
| 5  | N  | -1.321 | 0.841  | -0.025 |
| 6  | C  | 2.584  | 0.640  | 0.301  |
| 7  | C  | -2.584 | 0.640  | 0.301  |
| 8  | C  | 0.725  | 2.109  | 0.007  |
| 9  | C  | -0.725 | 2.109  | 0.007  |
| 10 | C  | 3.283  | -0.592 | 0.207  |
| 11 | C  | -3.283 | -0.592 | 0.207  |
| 12 | C  | 4.647  | -0.599 | 0.612  |
| 13 | C  | -4.647 | -0.599 | 0.612  |
| 14 | C  | 5.440  | -1.726 | 0.549  |
| 15 | C  | -5.440 | -1.726 | 0.549  |
| 16 | C  | 4.861  | -2.933 | 0.065  |
| 17 | C  | -4.860 | -2.933 | 0.065  |
| 18 | C  | 3.527  | -2.976 | -0.330 |
| 19 | C  | -3.527 | -2.976 | -0.330 |
| 20 | C  | 2.684  | -1.836 | -0.273 |
| 21 | C  | -2.684 | -1.837 | -0.273 |
| 22 | O  | 5.549  | -4.105 | -0.043 |
| 23 | O  | -5.549 | -4.106 | -0.043 |
| 24 | C  | 6.922  | -4.126 | 0.353  |
| 25 | C  | -6.922 | -4.127 | 0.353  |
| 26 | H  | 7.532  | -3.437 | -0.257 |
| 27 | H  | -7.531 | -3.438 | -0.257 |
| 28 | H  | 7.260  | -5.156 | 0.182  |
| 29 | H  | -7.259 | -5.156 | 0.181  |



|    |   |        |        |        |
|----|---|--------|--------|--------|
| 30 | H | 7.041  | -3.877 | 1.421  |
| 31 | H | -7.041 | -3.878 | 1.421  |
| 32 | C | 1.406  | 3.319  | -0.018 |
| 33 | C | -1.407 | 3.319  | -0.018 |
| 34 | C | 0.720  | 4.560  | -0.012 |
| 35 | C | -0.721 | 4.560  | -0.012 |
| 36 | C | 1.406  | 5.806  | -0.028 |
| 37 | C | -1.407 | 5.806  | -0.028 |
| 38 | C | 0.709  | 7.000  | -0.037 |
| 39 | C | -0.710 | 7.000  | -0.037 |
| 40 | H | 2.498  | 3.332  | -0.072 |
| 41 | H | -2.498 | 3.332  | -0.072 |
| 42 | H | 2.499  | 5.805  | -0.031 |
| 43 | H | -2.500 | 5.804  | -0.031 |
| 44 | H | 1.249  | 7.949  | -0.046 |
| 45 | H | -1.250 | 7.949  | -0.046 |
| 46 | H | 3.167  | 1.490  | 0.696  |
| 47 | H | -3.167 | 1.489  | 0.696  |
| 48 | H | 5.079  | 0.339  | 0.977  |
| 49 | H | -5.079 | 0.338  | 0.977  |
| 50 | H | 6.482  | -1.681 | 0.864  |
| 51 | H | -6.482 | -1.682 | 0.864  |
| 52 | H | 3.101  | -3.913 | -0.691 |
| 53 | H | -3.101 | -3.913 | -0.691 |

### Structural parameters

|          |       |
|----------|-------|
| R(1-2)   | 1.945 |
| R(1-3)   | 1.945 |
| R(1-4)   | 2.045 |
| R(1-5)   | 2.045 |
| R(2-20)  | 1.297 |
| R(3-21)  | 1.297 |
| R(4-6)   | 1.320 |
| R(4-8)   | 1.402 |
| R(5-9)   | 1.401 |
| R(5-7)   | 1.320 |
| R(6-10)  | 1.419 |
| R(6-46)  | 1.103 |
| R(7-11)  | 1.419 |
| R(7-47)  | 1.103 |
| R(8-9)   | 1.450 |
| R(8-32)  | 1.389 |
| R(9-33)  | 1.389 |
| R(10-20) | 1.462 |
| R(10-12) | 1.423 |
| R(11-13) | 1.423 |
| R(11-21) | 1.462 |
| R(12-14) | 1.379 |
| R(12-48) | 1.095 |
| R(13-15) | 1.380 |
| R(13-49) | 1.095 |
| R(14-16) | 1.424 |
| R(14-50) | 1.089 |
| R(15-17) | 1.424 |
| R(15-51) | 1.089 |
| R(16-18) | 1.391 |
| R(16-22) | 1.364 |

|            |        |
|------------|--------|
| R(17-19)   | 1.391  |
| R(17-23)   | 1.364  |
| R(18-20)   | 1.419  |
| R(18-52)   | 1.091  |
| R(19-21)   | 1.419  |
| R(19-53)   | 1.091  |
| R(22-24)   | 1.429  |
| R(23-25)   | 1.429  |
| R(24-30)   | 1.104  |
| R(24-28)   | 1.097  |
| R(24-26)   | 1.104  |
| R(25-29)   | 1.097  |
| R(25-31)   | 1.104  |
| R(25-27)   | 1.104  |
| R(32-34)   | 1.418  |
| R(32-40)   | 1.093  |
| R(33-35)   | 1.418  |
| R(33-41)   | 1.093  |
| R(34-35)   | 1.441  |
| R(34-36)   | 1.423  |
| R(35-37)   | 1.423  |
| R(36-38)   | 1.382  |
| R(36-42)   | 1.094  |
| R(37-43)   | 1.094  |
| R(37-39)   | 1.382  |
| R(38-39)   | 1.418  |
| R(38-44)   | 1.092  |
| R(39-45)   | 1.092  |
| A(2-1-3)   | 96.28  |
| A(2-1-4)   | 91.61  |
| A(2-1-5)   | 172.06 |
| A(1-2-20)  | 127.85 |
| A(3-1-4)   | 172.05 |
| A(3-1-5)   | 91.61  |
| A(1-3-21)  | 127.85 |
| A(4-1-5)   | 80.48  |
| A(1-4-6)   | 123.22 |
| A(1-4-8)   | 113.69 |
| A(1-5-9)   | 113.69 |
| A(1-5-7)   | 123.22 |
| A(2-20-10) | 123.99 |
| A(2-20-18) | 119.03 |
| A(3-21-11) | 123.98 |
| A(3-21-19) | 119.03 |
| A(6-4-8)   | 122.62 |
| A(4-6-10)  | 125.95 |
| A(4-6-46)  | 118.46 |
| A(4-8-9)   | 115.16 |
| A(4-8-32)  | 125.41 |
| A(9-5-7)   | 122.62 |
| A(5-9-8)   | 115.16 |
| A(5-9-33)  | 125.41 |
| A(5-7-11)  | 125.95 |
| A(5-7-47)  | 118.45 |
| A(10-6-46) | 115.59 |
| A(6-10-20) | 123.97 |
| A(6-10-12) | 117.23 |
| A(11-7-47) | 115.59 |

|             |        |
|-------------|--------|
| A(7-11-13)  | 117.22 |
| A(7-11-21)  | 123.98 |
| A(9-8-32)   | 119.37 |
| A(8-9-33)   | 119.37 |
| A(8-32-34)  | 121.68 |
| A(8-32-40)  | 120.06 |
| A(9-33-35)  | 121.68 |
| A(9-33-41)  | 120.07 |
| A(20-10-12) | 118.80 |
| A(10-20-18) | 116.98 |
| A(10-12-14) | 122.85 |
| A(10-12-48) | 117.96 |
| A(13-11-21) | 118.80 |
| A(11-13-15) | 122.84 |
| A(11-13-49) | 117.97 |
| A(11-21-19) | 116.99 |
| A(14-12-48) | 119.19 |
| A(12-14-16) | 118.29 |
| A(12-14-50) | 120.24 |
| A(15-13-49) | 119.18 |
| A(13-15-17) | 118.28 |
| A(13-15-51) | 120.24 |
| A(16-14-50) | 121.47 |
| A(14-16-18) | 120.86 |
| A(14-16-22) | 123.37 |
| A(17-15-51) | 121.48 |
| A(15-17-19) | 120.87 |
| A(15-17-23) | 123.37 |
| A(18-16-22) | 115.77 |
| A(16-18-20) | 122.21 |
| A(16-18-52) | 119.66 |
| A(16-22-24) | 118.41 |
| A(19-17-23) | 115.76 |
| A(17-19-21) | 122.20 |
| A(17-19-53) | 119.67 |
| A(17-23-25) | 118.41 |
| A(20-18-52) | 118.12 |
| A(21-19-53) | 118.13 |
| A(22-24-30) | 111.63 |
| A(22-24-28) | 105.46 |
| A(22-24-26) | 111.64 |
| A(23-25-29) | 105.46 |
| A(23-25-31) | 111.63 |
| A(23-25-27) | 111.64 |
| A(30-24-28) | 109.24 |
| A(30-24-26) | 109.52 |
| A(28-24-26) | 109.24 |
| A(29-25-31) | 109.25 |
| A(29-25-27) | 109.24 |
| A(31-25-27) | 109.51 |
| A(34-32-40) | 118.24 |
| A(32-34-35) | 118.93 |
| A(32-34-36) | 122.24 |
| A(35-33-41) | 118.23 |
| A(33-35-34) | 118.94 |
| A(33-35-37) | 122.24 |
| A(35-34-36) | 118.82 |
| A(34-35-37) | 118.82 |

|             |        |
|-------------|--------|
| A(34-36-38) | 120.90 |
| A(34-36-42) | 118.72 |
| A(35-37-43) | 118.70 |
| A(35-37-39) | 120.90 |
| A(38-36-42) | 120.38 |
| A(36-38-39) | 120.29 |
| A(36-38-44) | 120.05 |
| A(43-37-39) | 120.40 |
| A(37-39-38) | 120.28 |
| A(37-39-45) | 120.05 |
| A(39-38-44) | 119.67 |
| A(38-39-45) | 119.67 |

## IV. Optimised molecular structure for ZnL dimers

### Complex 1D

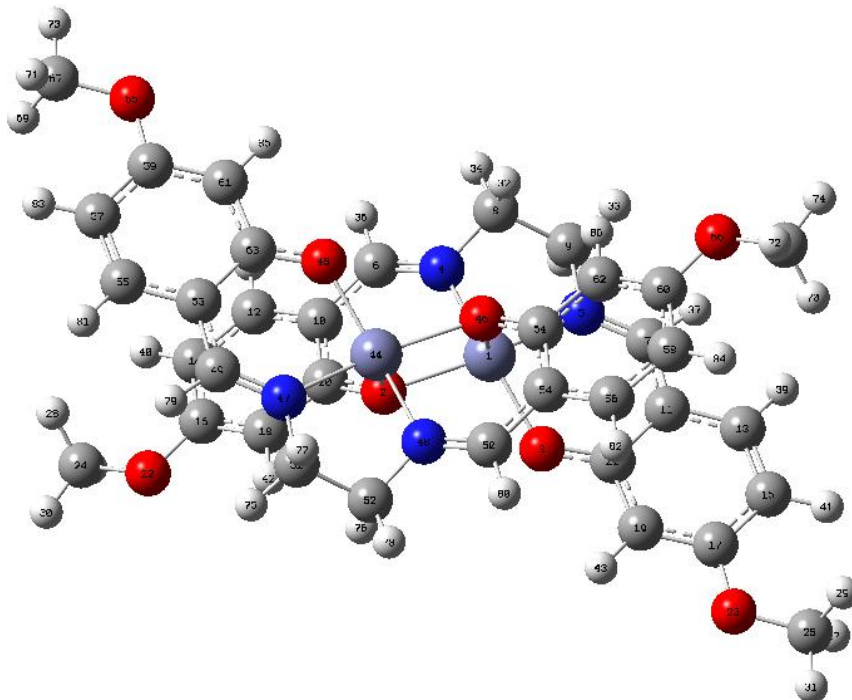

### Cartesian coordinates

|    |    | X      | Y      | Z      |
|----|----|--------|--------|--------|
| 1  | Zn | 0.865  | 0.389  | 1.232  |
| 2  | O  | -0.762 | 1.131  | 0.208  |
| 3  | O  | 2.269  | 1.460  | 0.353  |
| 4  | N  | -0.494 | -0.291 | 2.621  |
| 5  | N  | 2.163  | -0.138 | 2.736  |
| 6  | C  | -1.702 | 0.130  | 2.830  |
| 7  | C  | 3.458  | 0.017  | 2.692  |
| 8  | C  | 0.135  | -1.270 | 3.491  |
| 9  | C  | 1.528  | -0.743 | 3.901  |
| 10 | C  | -2.396 | 1.089  | 2.011  |
| 11 | C  | 4.183  | 0.704  | 1.668  |
| 12 | C  | -3.653 | 1.546  | 2.461  |
| 13 | C  | 5.596  | 0.728  | 1.782  |
| 14 | C  | -4.424 | 2.455  | 1.749  |
| 15 | C  | 6.415  | 1.390  | 0.885  |
| 16 | C  | -3.926 | 2.926  | 0.514  |
| 17 | C  | 5.801  | 2.082  | -0.192 |
| 18 | C  | -2.688 | 2.488  | 0.033  |
| 19 | C  | 4.417  | 2.090  | -0.340 |
| 20 | C  | -1.901 | 1.556  | 0.736  |
| 21 | C  | 3.550  | 1.409  | 0.557  |
| 22 | O  | -4.585 | 3.817  | -0.286 |
| 23 | O  | 6.503  | 2.778  | -1.142 |
| 24 | C  | -5.863 | 4.283  | 0.148  |
| 25 | C  | 7.924  | 2.815  | -1.031 |
| 26 | H  | -5.794 | 4.824  | 1.108  |

|    |    |        |        |        |
|----|----|--------|--------|--------|
| 27 | H  | 8.249  | 3.293  | -0.090 |
| 28 | H  | -6.585 | 3.453  | 0.246  |
| 29 | H  | 8.368  | 1.806  | -1.100 |
| 30 | H  | -6.206 | 4.973  | -0.632 |
| 31 | H  | 8.270  | 3.419  | -1.880 |
| 32 | H  | 0.256  | -2.201 | 2.909  |
| 33 | H  | 2.137  | -1.560 | 4.333  |
| 34 | H  | -0.476 | -1.496 | 4.385  |
| 35 | H  | 1.395  | 0.029  | 4.682  |
| 36 | H  | -2.261 | -0.254 | 3.705  |
| 37 | H  | 4.070  | -0.396 | 3.517  |
| 38 | H  | -4.031 | 1.164  | 3.415  |
| 39 | H  | 6.050  | 0.198  | 2.626  |
| 40 | H  | -5.391 | 2.773  | 2.136  |
| 41 | H  | 7.496  | 1.380  | 1.017  |
| 42 | H  | -2.331 | 2.859  | -0.929 |
| 43 | H  | 3.970  | 2.634  | -1.172 |
| 44 | Zn | -0.865 | -0.389 | -1.231 |
| 45 | O  | -2.269 | -1.460 | -0.353 |
| 46 | O  | 0.762  | -1.131 | -0.208 |
| 47 | N  | -2.163 | 0.138  | -2.736 |
| 48 | N  | 0.494  | 0.291  | -2.621 |
| 49 | C  | -3.458 | -0.017 | -2.692 |
| 50 | C  | 1.702  | -0.130 | -2.830 |
| 51 | C  | -1.528 | 0.743  | -3.901 |
| 52 | C  | -0.135 | 1.270  | -3.491 |
| 53 | C  | -4.183 | -0.705 | -1.668 |
| 54 | C  | 2.396  | -1.089 | -2.011 |
| 55 | C  | -5.596 | -0.728 | -1.782 |
| 56 | C  | 3.653  | -1.546 | -2.461 |
| 57 | C  | -6.415 | -1.390 | -0.885 |
| 58 | C  | 4.424  | -2.455 | -1.749 |
| 59 | C  | -5.801 | -2.082 | 0.192  |
| 60 | C  | 3.926  | -2.926 | -0.514 |
| 61 | C  | -4.417 | -2.090 | 0.340  |
| 62 | C  | 2.688  | -2.488 | -0.033 |
| 63 | C  | -3.550 | -1.409 | -0.557 |
| 64 | C  | 1.901  | -1.556 | -0.736 |
| 65 | O  | -6.503 | -2.778 | 1.142  |
| 66 | O  | 4.585  | -3.817 | 0.286  |
| 67 | C  | -7.924 | -2.816 | 1.031  |
| 68 | C  | 5.863  | -4.283 | -0.148 |
| 69 | H  | -8.368 | -1.807 | 1.100  |
| 70 | H  | 6.585  | -3.453 | -0.246 |
| 71 | H  | -8.249 | -3.293 | 0.090  |
| 72 | H  | 5.794  | -4.823 | -1.108 |
| 73 | H  | -8.270 | -3.419 | 1.880  |
| 74 | H  | 6.206  | -4.973 | 0.632  |
| 75 | H  | -2.137 | 1.560  | -4.333 |
| 76 | H  | -0.256 | 2.201  | -2.909 |
| 77 | H  | -1.395 | -0.029 | -4.682 |
| 78 | H  | 0.476  | 1.496  | -4.385 |
| 79 | H  | -4.070 | 0.396  | -3.517 |
| 80 | H  | 2.261  | 0.254  | -3.705 |
| 81 | H  | -6.050 | -0.198 | -2.626 |
| 82 | H  | 4.031  | -1.164 | -3.415 |
| 83 | H  | -7.496 | -1.380 | -1.017 |
| 84 | H  | 5.391  | -2.773 | -2.136 |

|    |   |        |        |       |
|----|---|--------|--------|-------|
| 85 | H | -3.970 | -2.635 | 1.172 |
| 86 | H | 2.331  | -2.859 | 0.929 |

### Structural parameters

|          |       |
|----------|-------|
| R(1-3)   | 1.972 |
| R(1-4)   | 2.059 |
| R(1-5)   | 2.056 |
| R(2-20)  | 1.326 |
| R(3-21)  | 1.298 |
| R(4-6)   | 1.296 |
| R(4-8)   | 1.453 |
| R(5-9)   | 1.459 |
| R(5-7)   | 1.304 |
| R(6-10)  | 1.439 |
| R(6-36)  | 1.107 |
| R(7-11)  | 1.431 |
| R(7-37)  | 1.108 |
| R(8-9)   | 1.545 |
| R(8-32)  | 1.104 |
| R(8-34)  | 1.106 |
| R(9-35)  | 1.107 |
| R(9-33)  | 1.106 |
| R(10-20) | 1.445 |
| R(10-12) | 1.412 |
| R(11-13) | 1.417 |
| R(11-21) | 1.461 |
| R(12-14) | 1.388 |
| R(12-38) | 1.094 |
| R(13-15) | 1.384 |
| R(13-39) | 1.095 |
| R(14-16) | 1.413 |
| R(14-40) | 1.089 |
| R(15-17) | 1.420 |
| R(15-41) | 1.089 |
| R(16-18) | 1.398 |
| R(16-22) | 1.367 |
| R(17-19) | 1.391 |
| R(17-23) | 1.370 |
| R(18-20) | 1.408 |
| R(18-42) | 1.091 |
| R(19-21) | 1.422 |
| R(19-43) | 1.091 |
| R(22-24) | 1.428 |
| R(23-25) | 1.426 |
| R(24-30) | 1.097 |
| R(24-28) | 1.104 |
| R(24-26) | 1.104 |
| R(25-29) | 1.104 |
| R(25-31) | 1.097 |
| R(25-27) | 1.104 |
| R(44-45) | 1.972 |
| R(44-48) | 2.059 |
| R(44-47) | 2.056 |
| R(45-63) | 1.298 |
| R(46-64) | 1.326 |
| R(47-51) | 1.459 |
| R(47-49) | 1.304 |

|            |        |
|------------|--------|
| R(48-50)   | 1.296  |
| R(48-52)   | 1.453  |
| R(49-53)   | 1.431  |
| R(49-79)   | 1.108  |
| R(50-54)   | 1.439  |
| R(50-80)   | 1.107  |
| R(51-52)   | 1.545  |
| R(51-77)   | 1.107  |
| R(51-75)   | 1.106  |
| R(52-76)   | 1.104  |
| R(52-78)   | 1.106  |
| R(53-55)   | 1.417  |
| R(53-63)   | 1.461  |
| R(54-56)   | 1.412  |
| R(54-64)   | 1.445  |
| R(55-57)   | 1.384  |
| R(55-81)   | 1.095  |
| R(56-58)   | 1.388  |
| R(56-82)   | 1.094  |
| R(57-59)   | 1.420  |
| R(57-83)   | 1.089  |
| R(58-60)   | 1.413  |
| R(58-84)   | 1.089  |
| R(59-61)   | 1.391  |
| R(59-65)   | 1.370  |
| R(60-62)   | 1.398  |
| R(60-66)   | 1.367  |
| R(61-63)   | 1.422  |
| R(61-85)   | 1.091  |
| R(62-64)   | 1.408  |
| R(62-86)   | 1.091  |
| R(65-67)   | 1.426  |
| R(66-68)   | 1.427  |
| R(67-73)   | 1.097  |
| R(67-69)   | 1.104  |
| R(67-71)   | 1.104  |
| R(68-70)   | 1.104  |
| R(68-74)   | 1.097  |
| R(68-72)   | 1.104  |
| A(3-1-4)   | 161.73 |
| A(3-1-5)   | 90.88  |
| A(1-3-21)  | 127.68 |
| A(4-1-5)   | 80.70  |
| A(1-4-6)   | 128.05 |
| A(1-4-8)   | 109.93 |
| A(1-5-9)   | 114.55 |
| A(1-5-7)   | 124.88 |
| A(2-20-10) | 122.83 |
| A(2-20-18) | 119.57 |
| A(3-21-11) | 124.51 |
| A(3-21-19) | 118.99 |
| A(6-4-8)   | 121.74 |
| A(4-6-10)  | 125.06 |
| A(4-6-36)  | 119.02 |
| A(4-8-9)   | 108.61 |
| A(4-8-32)  | 107.48 |
| A(4-8-34)  | 112.52 |
| A(9-5-7)   | 120.56 |



|             |        |
|-------------|--------|
| A(5-9-8)    | 108.81 |
| A(5-9-35)   | 109.10 |
| A(5-9-33)   | 112.21 |
| A(5-7-11)   | 125.76 |
| A(5-7-37)   | 118.66 |
| A(10-6-36)  | 115.92 |
| A(6-10-20)  | 123.51 |
| A(6-10-12)  | 117.63 |
| A(11-7-37)  | 115.57 |
| A(7-11-13)  | 117.12 |
| A(7-11-21)  | 123.79 |
| A(9-8-32)   | 109.17 |
| A(9-8-34)   | 110.67 |
| A(8-9-35)   | 108.49 |
| A(8-9-33)   | 110.38 |
| A(32-8-34)  | 108.30 |
| A(35-9-33)  | 107.76 |
| A(20-10-12) | 118.79 |
| A(10-20-18) | 117.60 |
| A(10-12-14) | 122.86 |
| A(10-12-38) | 118.17 |
| A(13-11-21) | 119.05 |
| A(11-13-15) | 123.09 |
| A(11-13-39) | 117.89 |
| A(11-21-19) | 116.49 |
| A(14-12-38) | 118.97 |
| A(12-14-16) | 118.14 |
| A(12-14-40) | 120.13 |
| A(15-13-39) | 119.02 |
| A(13-15-17) | 117.96 |
| A(13-15-41) | 120.32 |
| A(16-14-40) | 121.72 |
| A(14-16-18) | 120.54 |
| A(14-16-22) | 123.99 |
| A(17-15-41) | 121.72 |
| A(15-17-19) | 120.88 |
| A(15-17-23) | 123.46 |
| A(18-16-22) | 115.47 |
| A(16-18-20) | 122.02 |
| A(16-18-42) | 119.10 |
| A(16-22-24) | 117.81 |
| A(19-17-23) | 115.66 |
| A(17-19-21) | 122.51 |
| A(17-19-43) | 119.44 |
| A(17-23-25) | 118.06 |
| A(20-18-42) | 118.86 |
| A(21-19-43) | 118.04 |
| A(22-24-30) | 105.61 |
| A(22-24-28) | 111.52 |
| A(22-24-26) | 111.62 |
| A(23-25-29) | 111.80 |
| A(23-25-31) | 105.60 |
| A(23-25-27) | 111.77 |
| A(30-24-28) | 109.34 |
| A(30-24-26) | 109.24 |
| A(28-24-26) | 109.41 |
| A(29-25-31) | 109.16 |
| A(29-25-27) | 109.26 |

|             |        |
|-------------|--------|
| A(31-25-27) | 109.15 |
| A(45-44-48) | 161.72 |
| A(45-44-47) | 90.88  |
| A(44-45-63) | 127.68 |
| A(48-44-47) | 80.70  |
| A(44-48-50) | 128.06 |
| A(44-48-52) | 109.94 |
| A(44-47-51) | 114.55 |
| A(44-47-49) | 124.88 |
| A(45-63-53) | 124.50 |
| A(45-63-61) | 119.00 |
| A(46-64-54) | 122.83 |
| A(46-64-62) | 119.56 |
| A(51-47-49) | 120.56 |
| A(47-51-52) | 108.82 |
| A(47-51-77) | 109.11 |
| A(47-51-75) | 112.22 |
| A(47-49-53) | 125.76 |
| A(47-49-79) | 118.67 |
| A(50-48-52) | 121.73 |
| A(48-50-54) | 125.05 |
| A(48-50-80) | 119.02 |
| A(48-52-51) | 108.61 |
| A(48-52-76) | 107.48 |
| A(48-52-78) | 112.52 |
| A(53-49-79) | 115.57 |
| A(49-53-55) | 117.12 |
| A(49-53-63) | 123.80 |
| A(54-50-80) | 115.92 |
| A(50-54-56) | 117.63 |
| A(50-54-64) | 123.51 |
| A(52-51-77) | 108.49 |
| A(52-51-75) | 110.37 |
| A(51-52-76) | 109.17 |
| A(51-52-78) | 110.67 |
| A(77-51-75) | 107.75 |
| A(76-52-78) | 108.31 |
| A(55-53-63) | 119.05 |
| A(53-55-57) | 123.09 |
| A(53-55-81) | 117.89 |
| A(53-63-61) | 116.50 |
| A(56-54-64) | 118.80 |
| A(54-56-58) | 122.86 |
| A(54-56-82) | 118.17 |
| A(54-64-62) | 117.60 |
| A(57-55-81) | 119.02 |
| A(55-57-59) | 117.96 |
| A(55-57-83) | 120.32 |
| A(58-56-82) | 118.97 |
| A(56-58-60) | 118.14 |
| A(56-58-84) | 120.14 |
| A(59-57-83) | 121.72 |
| A(57-59-61) | 120.88 |
| A(57-59-65) | 123.45 |
| A(60-58-84) | 121.71 |
| A(58-60-62) | 120.54 |
| A(58-60-66) | 123.99 |
| A(61-59-65) | 115.66 |

|             |        |
|-------------|--------|
| A(59-61-63) | 122.52 |
| A(59-61-85) | 119.45 |
| A(59-65-67) | 118.07 |
| A(62-60-66) | 115.47 |
| A(60-62-64) | 122.02 |
| A(60-62-86) | 119.10 |
| A(60-66-68) | 117.81 |
| A(63-61-85) | 118.04 |
| A(64-62-86) | 118.86 |
| A(65-67-73) | 105.60 |
| A(65-67-69) | 111.81 |
| A(65-67-71) | 111.77 |
| A(66-68-70) | 111.52 |
| A(66-68-74) | 105.61 |
| A(66-68-72) | 111.62 |
| A(73-67-69) | 109.16 |
| A(73-67-71) | 109.15 |
| A(69-67-71) | 109.25 |
| A(70-68-74) | 109.34 |
| A(70-68-72) | 109.41 |
| A(74-68-72) | 109.25 |

### Complex 2D

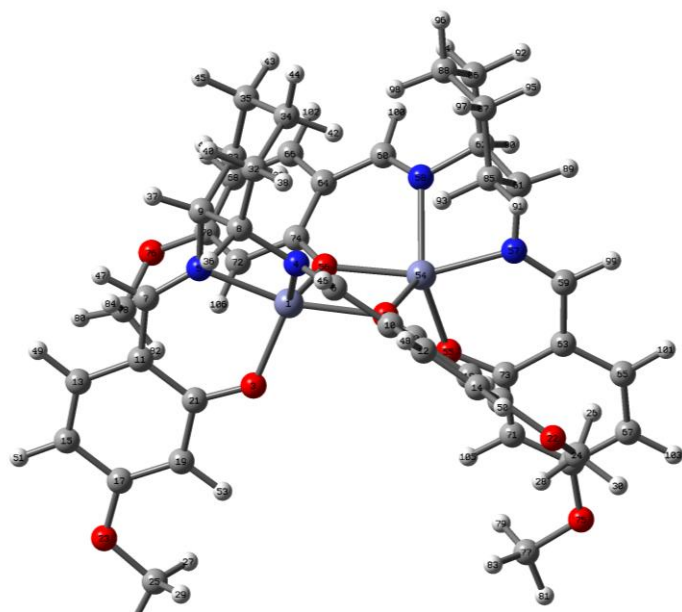

### Cartesian coordinates

|   |    | X      | Y      | Z     |
|---|----|--------|--------|-------|
| 1 | Zn | 1.348  | -0.313 | 0.886 |
| 2 | O  | -0.698 | -0.274 | 1.068 |
| 3 | O  | 1.994  | 1.546  | 1.121 |
| 4 | N  | 1.187  | -1.918 | 2.261 |
| 5 | N  | 3.269  | -1.008 | 0.923 |
| 6 | C  | 0.337  | -1.895 | 3.250 |
| 7 | C  | 4.348  | -0.286 | 1.039 |

|    |    |        |        |        |
|----|----|--------|--------|--------|
| 8  | C  | 2.421  | -2.718 | 2.403  |
| 9  | C  | 3.285  | -2.446 | 1.132  |
| 10 | C  | -0.883 | -1.139 | 3.304  |
| 11 | C  | 4.399  | 1.145  | 1.039  |
| 12 | C  | -1.650 | -1.178 | 4.499  |
| 13 | C  | 5.682  | 1.760  | 1.053  |
| 14 | C  | -2.826 | -0.473 | 4.643  |
| 15 | C  | 5.854  | 3.126  | 1.096  |
| 16 | C  | -3.285 | 0.325  | 3.563  |
| 17 | C  | 4.698  | 3.954  | 1.155  |
| 18 | C  | -2.567 | 0.383  | 2.366  |
| 19 | C  | 3.423  | 3.401  | 1.166  |
| 20 | C  | -1.362 | -0.337 | 2.210  |
| 21 | C  | 3.211  | 1.987  | 1.106  |
| 22 | O  | -4.439 | 1.004  | 3.799  |
| 23 | O  | 4.961  | 5.293  | 1.205  |
| 24 | C  | -4.933 | 1.864  | 2.762  |
| 25 | C  | 3.846  | 6.181  | 1.295  |
| 26 | H  | -5.175 | 1.299  | 1.847  |
| 27 | H  | 3.188  | 6.093  | 0.413  |
| 28 | H  | -4.202 | 2.651  | 2.513  |
| 29 | H  | 3.255  | 5.994  | 2.208  |
| 30 | H  | -5.843 | 2.320  | 3.168  |
| 31 | H  | 4.273  | 7.191  | 1.334  |
| 32 | C  | 2.171  | -4.226 | 2.598  |
| 33 | C  | 2.705  | -3.160 | -0.105 |
| 34 | C  | 1.588  | -4.897 | 1.348  |
| 35 | C  | 2.495  | -4.661 | 0.133  |
| 36 | H  | 2.991  | -2.335 | 3.271  |
| 37 | H  | 4.313  | -2.811 | 1.326  |
| 38 | H  | 1.516  | -4.383 | 3.471  |
| 39 | H  | 1.737  | -2.688 | -0.350 |
| 40 | H  | 3.138  | -4.698 | 2.850  |
| 41 | H  | 3.365  | -2.976 | -0.967 |
| 42 | H  | 0.586  | -4.480 | 1.143  |
| 43 | H  | 2.062  | -5.124 | -0.769 |
| 44 | H  | 1.454  | -5.976 | 1.531  |
| 45 | H  | 3.470  | -5.155 | 0.301  |
| 46 | H  | 0.551  | -2.489 | 4.160  |
| 47 | H  | 5.318  | -0.806 | 1.163  |
| 48 | H  | -1.285 | -1.790 | 5.330  |
| 49 | H  | 6.564  | 1.111  | 1.024  |
| 50 | H  | -3.412 | -0.498 | 5.563  |
| 51 | H  | 6.839  | 3.593  | 1.106  |
| 52 | H  | -2.895 | 0.988  | 1.522  |
| 53 | H  | 2.521  | 4.011  | 1.219  |
| 54 | Zn | -1.348 | -0.313 | -0.886 |
| 55 | O  | -1.994 | 1.546  | -1.121 |
| 56 | O  | 0.698  | -0.274 | -1.068 |
| 57 | N  | -3.269 | -1.008 | -0.923 |
| 58 | N  | -1.187 | -1.918 | -2.261 |
| 59 | C  | -4.348 | -0.286 | -1.039 |
| 60 | C  | -0.337 | -1.895 | -3.250 |
| 61 | C  | -3.285 | -2.446 | -1.132 |
| 62 | C  | -2.421 | -2.718 | -2.403 |
| 63 | C  | -4.399 | 1.145  | -1.039 |
| 64 | C  | 0.883  | -1.139 | -3.304 |
| 65 | C  | -5.682 | 1.760  | -1.053 |

|     |   |        |        |        |
|-----|---|--------|--------|--------|
| 66  | C | 1.650  | -1.178 | -4.499 |
| 67  | C | -5.854 | 3.126  | -1.096 |
| 68  | C | 2.826  | -0.473 | -4.643 |
| 69  | C | -4.698 | 3.954  | -1.155 |
| 70  | C | 3.285  | 0.325  | -3.563 |
| 71  | C | -3.423 | 3.401  | -1.166 |
| 72  | C | 2.567  | 0.383  | -2.366 |
| 73  | C | -3.211 | 1.987  | -1.106 |
| 74  | C | 1.362  | -0.337 | -2.210 |
| 75  | O | -4.961 | 5.293  | -1.205 |
| 76  | O | 4.439  | 1.004  | -3.799 |
| 77  | C | -3.846 | 6.181  | -1.295 |
| 78  | C | 4.933  | 1.864  | -2.762 |
| 79  | H | -3.255 | 5.994  | -2.208 |
| 80  | H | 5.843  | 2.320  | -3.168 |
| 81  | H | -4.273 | 7.191  | -1.334 |
| 82  | H | 4.202  | 2.651  | -2.513 |
| 83  | H | -3.188 | 6.093  | -0.413 |
| 84  | H | 5.175  | 1.299  | -1.847 |
| 85  | C | -2.705 | -3.160 | 0.105  |
| 86  | C | -2.171 | -4.226 | -2.598 |
| 87  | C | -2.495 | -4.661 | -0.133 |
| 88  | C | -1.588 | -4.897 | -1.348 |
| 89  | H | -4.313 | -2.811 | -1.326 |
| 90  | H | -2.991 | -2.335 | -3.271 |
| 91  | H | -3.365 | -2.976 | 0.967  |
| 92  | H | -3.138 | -4.698 | -2.850 |
| 93  | H | -1.737 | -2.688 | 0.350  |
| 94  | H | -1.516 | -4.383 | -3.471 |
| 95  | H | -3.470 | -5.155 | -0.301 |
| 96  | H | -1.454 | -5.976 | -1.531 |
| 97  | H | -2.062 | -5.124 | 0.769  |
| 98  | H | -0.586 | -4.480 | -1.143 |
| 99  | H | -5.318 | -0.806 | -1.163 |
| 100 | H | -0.551 | -2.489 | -4.160 |
| 101 | H | -6.564 | 1.111  | -1.024 |
| 102 | H | 1.285  | -1.790 | -5.330 |
| 103 | H | -6.839 | 3.593  | -1.106 |
| 104 | H | 3.412  | -0.498 | -5.563 |
| 105 | H | -2.521 | 4.011  | -1.219 |
| 106 | H | 2.895  | 0.988  | -1.522 |

### Structural parameters

|         |       |
|---------|-------|
| R(1-5)  | 2.042 |
| R(1-3)  | 1.982 |
| R(1-2)  | 2.055 |
| R(1-4)  | 2.120 |
| R(2-20) | 1.322 |
| R(3-21) | 1.295 |
| R(4-6)  | 1.305 |
| R(4-8)  | 1.477 |
| R(5-9)  | 1.454 |
| R(5-7)  | 1.304 |
| R(6-10) | 1.436 |
| R(6-46) | 1.107 |
| R(7-11) | 1.431 |
| R(7-47) | 1.108 |

|           |       |
|-----------|-------|
| R(8-9)    | 1.561 |
| R(8-32)   | 1.541 |
| R(8-36)   | 1.107 |
| R(9-33)   | 1.541 |
| R(9-37)   | 1.109 |
| R(10-20)  | 1.439 |
| R(10-12)  | 1.421 |
| R(11-13)  | 1.424 |
| R(11-21)  | 1.458 |
| R(12-14)  | 1.379 |
| R(12-48)  | 1.095 |
| R(13-15)  | 1.377 |
| R(13-49)  | 1.095 |
| R(14-16)  | 1.419 |
| R(14-50)  | 1.091 |
| R(15-17)  | 1.422 |
| R(15-51)  | 1.090 |
| R(16-18)  | 1.397 |
| R(16-22)  | 1.359 |
| R(17-19)  | 1.390 |
| R(17-23)  | 1.366 |
| R(18-20)  | 1.413 |
| R(18-52)  | 1.089 |
| R(19-21)  | 1.430 |
| R(19-53)  | 1.090 |
| R(22-24)  | 1.434 |
| R(23-25)  | 1.428 |
| R(24-30)  | 1.096 |
| R(24-26)  | 1.102 |
| R(24-28)  | 1.103 |
| R(25-31)  | 1.097 |
| R(25-29)  | 1.104 |
| R(25-27)  | 1.104 |
| R(32-34)  | 1.534 |
| R(32-40)  | 1.106 |
| R(32-38)  | 1.103 |
| R(33-35)  | 1.533 |
| R(33-41)  | 1.102 |
| R(33-39)  | 1.104 |
| R(34-35)  | 1.534 |
| R(34-44)  | 1.102 |
| R(34-42)  | 1.104 |
| R(35-45)  | 1.106 |
| R(35-43)  | 1.102 |
| R(54-57)  | 2.042 |
| R(54-55)  | 1.982 |
| R(54-58)  | 2.120 |
| R(54-56)  | 2.055 |
| R(55-73)  | 1.295 |
| R(56-74)  | 1.322 |
| R(57-61)  | 1.454 |
| R(57-59)  | 1.304 |
| R(58-60)  | 1.305 |
| R(58-62)  | 1.477 |
| R(59-63)  | 1.431 |
| R(59-99)  | 1.108 |
| R(60-64)  | 1.436 |
| R(60-100) | 1.107 |

|            |        |
|------------|--------|
| R(61-62)   | 1.561  |
| R(61-85)   | 1.541  |
| R(61-89)   | 1.109  |
| R(62-86)   | 1.541  |
| R(62-90)   | 1.107  |
| R(63-65)   | 1.424  |
| R(63-73)   | 1.458  |
| R(64-66)   | 1.421  |
| R(64-74)   | 1.439  |
| R(65-67)   | 1.377  |
| R(65-101)  | 1.095  |
| R(66-68)   | 1.379  |
| R(66-102)  | 1.095  |
| R(67-69)   | 1.422  |
| R(67-103)  | 1.090  |
| R(68-70)   | 1.419  |
| R(68-104)  | 1.091  |
| R(69-71)   | 1.390  |
| R(69-75)   | 1.366  |
| R(70-72)   | 1.397  |
| R(70-76)   | 1.359  |
| R(71-73)   | 1.430  |
| R(71-105)  | 1.090  |
| R(72-74)   | 1.413  |
| R(72-106)  | 1.089  |
| R(75-77)   | 1.428  |
| R(76-78)   | 1.434  |
| R(77-81)   | 1.097  |
| R(77-79)   | 1.104  |
| R(77-83)   | 1.104  |
| R(78-80)   | 1.096  |
| R(78-84)   | 1.102  |
| R(78-82)   | 1.103  |
| R(85-87)   | 1.533  |
| R(85-91)   | 1.102  |
| R(85-93)   | 1.104  |
| R(86-88)   | 1.534  |
| R(86-92)   | 1.106  |
| R(86-94)   | 1.103  |
| R(87-88)   | 1.534  |
| R(87-95)   | 1.106  |
| R(87-97)   | 1.102  |
| R(88-96)   | 1.102  |
| R(88-98)   | 1.104  |
| A(5-1-3)   | 90.62  |
| A(5-1-2)   | 160.25 |
| A(5-1-4)   | 78.59  |
| A(1-5-9)   | 110.47 |
| A(1-5-7)   | 126.27 |
| A(3-1-2)   | 107.21 |
| A(3-1-4)   | 131.13 |
| A(1-3-21)  | 128.63 |
| A(2-1-4)   | 83.17  |
| A(1-2-20)  | 125.14 |
| A(1-4-6)   | 121.89 |
| A(1-4-8)   | 114.12 |
| A(2-20-10) | 121.11 |
| A(2-20-18) | 119.95 |

|             |        |
|-------------|--------|
| A(3-21-11)  | 124.71 |
| A(3-21-19)  | 118.41 |
| A(6-4-8)    | 118.77 |
| A(4-6-10)   | 126.24 |
| A(4-6-46)   | 119.18 |
| A(4-8-9)    | 106.87 |
| A(4-8-32)   | 113.99 |
| A(4-8-36)   | 108.55 |
| A(9-5-7)    | 121.72 |
| A(5-9-8)    | 106.44 |
| A(5-9-33)   | 109.82 |
| A(5-9-37)   | 111.19 |
| A(5-7-11)   | 125.63 |
| A(5-7-47)   | 118.35 |
| A(10-6-46)  | 114.57 |
| A(6-10-20)  | 123.22 |
| A(6-10-12)  | 118.40 |
| A(11-7-47)  | 116.01 |
| A(7-11-13)  | 117.64 |
| A(7-11-21)  | 123.29 |
| A(9-8-32)   | 111.29 |
| A(9-8-36)   | 107.02 |
| A(8-9-33)   | 111.37 |
| A(8-9-37)   | 108.25 |
| A(32-8-36)  | 108.85 |
| A(8-32-34)  | 112.75 |
| A(8-32-40)  | 107.77 |
| A(8-32-38)  | 109.62 |
| A(33-9-37)  | 109.73 |
| A(9-33-35)  | 112.37 |
| A(9-33-41)  | 108.97 |
| A(9-33-39)  | 108.03 |
| A(20-10-12) | 118.38 |
| A(10-20-18) | 118.94 |
| A(10-12-14) | 122.29 |
| A(10-12-48) | 118.26 |
| A(13-11-21) | 118.96 |
| A(11-13-15) | 122.76 |
| A(11-13-49) | 117.97 |
| A(11-21-19) | 116.88 |
| A(14-12-48) | 119.45 |
| A(12-14-16) | 118.96 |
| A(12-14-50) | 122.27 |
| A(15-13-49) | 119.27 |
| A(13-15-17) | 118.51 |
| A(13-15-51) | 122.51 |
| A(16-14-50) | 118.77 |
| A(14-16-18) | 120.59 |
| A(14-16-22) | 115.06 |
| A(17-15-51) | 118.96 |
| A(15-17-19) | 120.93 |
| A(15-17-23) | 114.57 |
| A(18-16-22) | 124.35 |
| A(16-18-20) | 120.83 |
| A(16-18-52) | 122.14 |
| A(16-22-24) | 117.78 |
| A(19-17-23) | 124.50 |
| A(17-19-21) | 121.93 |



|             |        |
|-------------|--------|
| A(17-19-53) | 122.46 |
| A(17-23-25) | 117.50 |
| A(20-18-52) | 117.02 |
| A(21-19-53) | 115.60 |
| A(22-24-30) | 105.49 |
| A(22-24-26) | 111.64 |
| A(22-24-28) | 111.28 |
| A(23-25-31) | 105.67 |
| A(23-25-29) | 111.37 |
| A(23-25-27) | 111.44 |
| A(30-24-26) | 109.76 |
| A(30-24-28) | 109.68 |
| A(26-24-28) | 108.94 |
| A(31-25-29) | 109.59 |
| A(31-25-27) | 109.55 |
| A(29-25-27) | 109.15 |
| A(34-32-40) | 109.34 |
| A(34-32-38) | 110.96 |
| A(32-34-35) | 110.68 |
| A(32-34-44) | 109.83 |
| A(32-34-42) | 109.33 |
| A(40-32-38) | 106.12 |
| A(35-33-41) | 111.55 |
| A(35-33-39) | 109.45 |
| A(33-35-34) | 110.76 |
| A(33-35-45) | 109.87 |
| A(33-35-43) | 109.75 |
| A(41-33-39) | 106.23 |
| A(35-34-44) | 110.71 |
| A(35-34-42) | 109.33 |
| A(34-35-45) | 109.38 |
| A(34-35-43) | 110.58 |
| A(44-34-42) | 106.88 |
| A(45-35-43) | 106.40 |
| A(57-54-55) | 90.62  |
| A(57-54-58) | 78.59  |
| A(57-54-56) | 160.25 |
| A(54-57-61) | 110.47 |
| A(54-57-59) | 126.27 |
| A(55-54-58) | 131.13 |
| A(55-54-56) | 107.21 |
| A(54-55-73) | 128.63 |
| A(58-54-56) | 83.17  |
| A(54-58-60) | 121.89 |
| A(54-58-62) | 114.12 |
| A(54-56-74) | 125.14 |
| A(55-73-63) | 124.71 |
| A(55-73-71) | 118.41 |
| A(56-74-64) | 121.10 |
| A(56-74-72) | 119.96 |
| A(61-57-59) | 121.72 |
| A(57-61-62) | 106.44 |
| A(57-61-85) | 109.82 |
| A(57-61-89) | 111.19 |
| A(57-59-63) | 125.63 |
| A(57-59-99) | 118.35 |
| A(60-58-62) | 118.77 |
| A(58-60-64) | 126.24 |

|              |        |
|--------------|--------|
| A(58-60-100) | 119.18 |
| A(58-62-61)  | 106.87 |
| A(58-62-86)  | 113.99 |
| A(58-62-90)  | 108.55 |
| A(63-59-99)  | 116.02 |
| A(59-63-65)  | 117.64 |
| A(59-63-73)  | 123.29 |
| A(64-60-100) | 114.57 |
| A(60-64-66)  | 118.40 |
| A(60-64-74)  | 123.22 |
| A(62-61-85)  | 111.37 |
| A(62-61-89)  | 108.25 |
| A(61-62-86)  | 111.29 |
| A(61-62-90)  | 107.02 |
| A(85-61-89)  | 109.73 |
| A(61-85-87)  | 112.37 |
| A(61-85-91)  | 108.97 |
| A(61-85-93)  | 108.03 |
| A(86-62-90)  | 108.85 |
| A(62-86-88)  | 112.76 |
| A(62-86-92)  | 107.77 |
| A(62-86-94)  | 109.62 |
| A(65-63-73)  | 118.96 |
| A(63-65-67)  | 122.76 |
| A(63-65-101) | 117.97 |
| A(63-73-71)  | 116.88 |
| A(66-64-74)  | 118.38 |
| A(64-66-68)  | 122.29 |
| A(64-66-102) | 118.26 |
| A(64-74-72)  | 118.94 |
| A(67-65-101) | 119.27 |
| A(65-67-69)  | 118.51 |
| A(65-67-103) | 122.51 |
| A(68-66-102) | 119.45 |
| A(66-68-70)  | 118.96 |
| A(66-68-104) | 122.27 |
| A(69-67-103) | 118.96 |
| A(67-69-71)  | 120.93 |
| A(67-69-75)  | 114.57 |
| A(70-68-104) | 118.77 |
| A(68-70-72)  | 120.59 |
| A(68-70-76)  | 115.06 |
| A(71-69-75)  | 124.50 |
| A(69-71-73)  | 121.93 |
| A(69-71-105) | 122.46 |
| A(69-75-77)  | 117.50 |
| A(72-70-76)  | 124.35 |
| A(70-72-74)  | 120.84 |
| A(70-72-106) | 122.14 |
| A(70-76-78)  | 117.78 |
| A(73-71-105) | 115.60 |
| A(74-72-106) | 117.02 |
| A(75-77-81)  | 105.67 |
| A(75-77-79)  | 111.37 |
| A(75-77-83)  | 111.44 |
| A(76-78-80)  | 105.49 |
| A(76-78-84)  | 111.64 |
| A(76-78-82)  | 111.28 |

|             |        |
|-------------|--------|
| A(81-77-79) | 109.59 |
| A(81-77-83) | 109.55 |
| A(79-77-83) | 109.16 |
| A(80-78-84) | 109.76 |
| A(80-78-82) | 109.68 |
| A(84-78-82) | 108.94 |
| A(87-85-91) | 111.55 |
| A(87-85-93) | 109.45 |
| A(85-87-88) | 110.77 |
| A(85-87-95) | 109.87 |
| A(85-87-97) | 109.75 |
| A(91-85-93) | 106.23 |
| A(88-86-92) | 109.34 |
| A(88-86-94) | 110.97 |
| A(86-88-87) | 110.67 |
| A(86-88-96) | 109.83 |
| A(86-88-98) | 109.33 |
| A(92-86-94) | 106.12 |
| A(88-87-95) | 109.39 |
| A(88-87-97) | 110.58 |
| A(87-88-96) | 110.72 |
| A(87-88-98) | 109.33 |
| A(95-87-97) | 106.40 |
| A(96-88-98) | 106.88 |

### Complex 3D

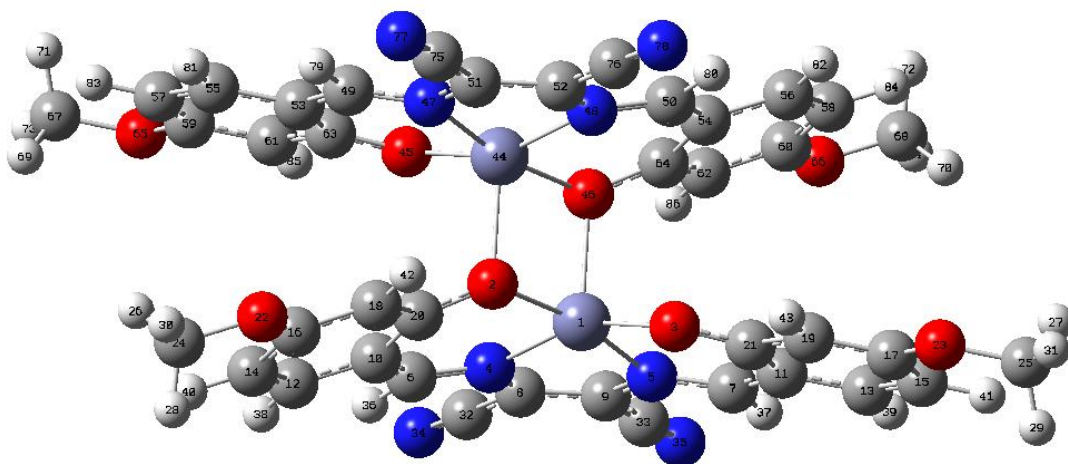

### Cartesian coordinates

|   |    | X      | Y      | Z      |
|---|----|--------|--------|--------|
| 1 | Zn | -0.937 | -0.894 | -0.880 |
| 2 | O  | 0.744  | 0.220  | -1.108 |
| 3 | O  | -2.275 | 0.438  | -1.427 |
| 4 | N  | 0.248  | -2.589 | -1.051 |
| 5 | N  | -2.394 | -2.362 | -0.822 |
| 6 | C  | 1.506  | -2.634 | -1.452 |
| 7 | C  | -3.702 | -2.146 | -0.894 |
| 8 | C  | -0.465 | -3.739 | -0.745 |
| 9 | C  | -1.852 | -3.614 | -0.616 |

|    |    |        |        |        |
|----|----|--------|--------|--------|
| 10 | C  | 2.279  | -1.512 | -1.859 |
| 11 | C  | -4.303 | -0.900 | -1.176 |
| 12 | C  | 3.550  | -1.783 | -2.435 |
| 13 | C  | -5.729 | -0.875 | -1.229 |
| 14 | C  | 4.380  | -0.787 | -2.914 |
| 15 | C  | -6.445 | 0.259  | -1.542 |
| 16 | C  | 3.942  | 0.559  | -2.821 |
| 17 | C  | -5.726 | 1.456  | -1.835 |
| 18 | C  | 2.704  | 0.866  | -2.246 |
| 19 | C  | -4.336 | 1.481  | -1.798 |
| 20 | C  | 1.863  | -0.130 | -1.724 |
| 21 | C  | -3.565 | 0.337  | -1.463 |
| 22 | O  | 4.662  | 1.623  | -3.260 |
| 23 | O  | -6.331 | 2.630  | -2.163 |
| 24 | C  | 5.941  | 1.382  | -3.856 |
| 25 | C  | -7.760 | 2.669  | -2.229 |
| 26 | H  | 6.633  | 0.907  | -3.142 |
| 27 | H  | -8.218 | 2.432  | -1.254 |
| 28 | H  | 5.851  | 0.757  | -4.761 |
| 29 | H  | -8.148 | 1.980  | -2.998 |
| 30 | H  | 6.324  | 2.372  | -4.133 |
| 31 | H  | -8.010 | 3.700  | -2.507 |
| 32 | C  | 0.190  | -4.995 | -0.613 |
| 33 | C  | -2.680 | -4.735 | -0.320 |
| 34 | N  | 0.800  | -5.991 | -0.531 |
| 35 | N  | -3.434 | -5.599 | -0.086 |
| 36 | H  | 1.996  | -3.618 | -1.535 |
| 37 | H  | -4.383 | -3.001 | -0.747 |
| 38 | H  | 3.870  | -2.826 | -2.507 |
| 39 | H  | -6.265 | -1.804 | -1.015 |
| 40 | H  | 5.346  | -1.042 | -3.348 |
| 41 | H  | -7.533 | 0.229  | -1.574 |
| 42 | H  | 2.392  | 1.909  | -2.175 |
| 43 | H  | -3.808 | 2.408  | -2.025 |
| 44 | Zn | 0.937  | 0.894  | 0.880  |
| 45 | O  | 2.275  | -0.438 | 1.427  |
| 46 | O  | -0.744 | -0.220 | 1.108  |
| 47 | N  | 2.394  | 2.362  | 0.822  |
| 48 | N  | -0.248 | 2.589  | 1.051  |
| 49 | C  | 3.702  | 2.147  | 0.894  |
| 50 | C  | -1.506 | 2.634  | 1.453  |
| 51 | C  | 1.852  | 3.614  | 0.616  |
| 52 | C  | 0.465  | 3.739  | 0.745  |
| 53 | C  | 4.303  | 0.900  | 1.176  |
| 54 | C  | -2.279 | 1.512  | 1.859  |
| 55 | C  | 5.729  | 0.875  | 1.228  |
| 56 | C  | -3.550 | 1.782  | 2.435  |
| 57 | C  | 6.445  | -0.259 | 1.542  |
| 58 | C  | -4.380 | 0.787  | 2.914  |
| 59 | C  | 5.726  | -1.456 | 1.835  |
| 60 | C  | -3.942 | -0.559 | 2.821  |
| 61 | C  | 4.336  | -1.481 | 1.798  |
| 62 | C  | -2.704 | -0.866 | 2.246  |
| 63 | C  | 3.565  | -0.337 | 1.463  |
| 64 | C  | -1.863 | 0.130  | 1.724  |
| 65 | O  | 6.332  | -2.630 | 2.163  |
| 66 | O  | -4.662 | -1.624 | 3.260  |
| 67 | C  | 7.760  | -2.669 | 2.229  |

|    |   |        |        |       |
|----|---|--------|--------|-------|
| 68 | C | -5.940 | -1.383 | 3.857 |
| 69 | H | 8.218  | -2.432 | 1.254 |
| 70 | H | -6.633 | -0.907 | 3.142 |
| 71 | H | 8.148  | -1.980 | 2.998 |
| 72 | H | -5.851 | -0.758 | 4.761 |
| 73 | H | 8.011  | -3.699 | 2.507 |
| 74 | H | -6.323 | -2.372 | 4.133 |
| 75 | C | 2.680  | 4.735  | 0.320 |
| 76 | C | -0.190 | 4.995  | 0.613 |
| 77 | N | 3.434  | 5.599  | 0.086 |
| 78 | N | -0.800 | 5.991  | 0.530 |
| 79 | H | 4.383  | 3.001  | 0.747 |
| 80 | H | -1.996 | 3.618  | 1.535 |
| 81 | H | 6.264  | 1.805  | 1.015 |
| 82 | H | -3.870 | 2.826  | 2.508 |
| 83 | H | 7.533  | -0.229 | 1.574 |
| 84 | H | -5.345 | 1.042  | 3.348 |
| 85 | H | 3.808  | -2.408 | 2.025 |
| 86 | H | -2.392 | -1.909 | 2.175 |

### Structural parameters

|          |       |
|----------|-------|
| R(1-3)   | 1.966 |
| R(2-20)  | 1.325 |
| R(3-21)  | 1.294 |
| R(4-6)   | 1.321 |
| R(4-8)   | 1.387 |
| R(5-7)   | 1.328 |
| R(5-9)   | 1.379 |
| R(6-10)  | 1.422 |
| R(6-36)  | 1.102 |
| R(7-11)  | 1.413 |
| R(7-37)  | 1.103 |
| R(8-9)   | 1.399 |
| R(8-32)  | 1.422 |
| R(9-33)  | 1.425 |
| R(10-12) | 1.421 |
| R(10-20) | 1.450 |
| R(11-13) | 1.427 |
| R(11-21) | 1.468 |
| R(12-14) | 1.382 |
| R(12-38) | 1.094 |
| R(13-15) | 1.377 |
| R(13-39) | 1.094 |
| R(14-16) | 1.418 |
| R(14-40) | 1.089 |
| R(15-17) | 1.427 |
| R(15-41) | 1.089 |
| R(16-18) | 1.399 |
| R(16-22) | 1.358 |
| R(17-19) | 1.391 |
| R(17-23) | 1.361 |
| R(18-20) | 1.404 |
| R(18-42) | 1.090 |
| R(19-21) | 1.419 |
| R(19-43) | 1.091 |
| R(22-24) | 1.432 |

|            |        |
|------------|--------|
| R(23-25)   | 1.430  |
| R(24-30)   | 1.096  |
| R(24-26)   | 1.103  |
| R(24-28)   | 1.103  |
| R(25-27)   | 1.103  |
| R(25-31)   | 1.096  |
| R(25-29)   | 1.103  |
| R(32-34)   | 1.171  |
| R(33-35)   | 1.170  |
| R(44-45)   | 1.966  |
| R(45-63)   | 1.294  |
| R(46-64)   | 1.325  |
| R(47-49)   | 1.328  |
| R(47-51)   | 1.379  |
| R(48-50)   | 1.321  |
| R(48-52)   | 1.387  |
| R(49-53)   | 1.413  |
| R(49-79)   | 1.103  |
| R(50-54)   | 1.422  |
| R(50-80)   | 1.102  |
| R(51-52)   | 1.399  |
| R(51-75)   | 1.425  |
| R(52-76)   | 1.422  |
| R(53-55)   | 1.427  |
| R(53-63)   | 1.469  |
| R(54-64)   | 1.450  |
| R(54-56)   | 1.421  |
| R(55-57)   | 1.377  |
| R(55-81)   | 1.094  |
| R(56-58)   | 1.382  |
| R(56-82)   | 1.094  |
| R(57-59)   | 1.427  |
| R(57-83)   | 1.089  |
| R(58-60)   | 1.418  |
| R(58-84)   | 1.089  |
| R(59-61)   | 1.391  |
| R(59-65)   | 1.361  |
| R(60-62)   | 1.399  |
| R(60-66)   | 1.358  |
| R(61-63)   | 1.419  |
| R(61-85)   | 1.091  |
| R(62-64)   | 1.404  |
| R(62-86)   | 1.090  |
| R(65-67)   | 1.430  |
| R(66-68)   | 1.432  |
| R(67-73)   | 1.096  |
| R(67-69)   | 1.103  |
| R(67-71)   | 1.103  |
| R(68-70)   | 1.103  |
| R(68-74)   | 1.096  |
| R(68-72)   | 1.103  |
| R(75-77)   | 1.170  |
| R(76-78)   | 1.171  |
| A(1-3-21)  | 129.28 |
| A(2-20-10) | 122.53 |
| A(2-20-18) | 119.44 |
| A(3-21-11) | 124.19 |
| A(3-21-19) | 118.98 |

|             |        |
|-------------|--------|
| A(6-4-8)    | 121.88 |
| A(4-6-10)   | 125.31 |
| A(4-6-36)   | 118.43 |
| A(4-8-9)    | 117.09 |
| A(4-8-32)   | 121.07 |
| A(7-5-9)    | 122.84 |
| A(5-7-11)   | 124.99 |
| A(5-7-37)   | 118.39 |
| A(5-9-8)    | 117.19 |
| A(5-9-33)   | 121.14 |
| A(10-6-36)  | 116.19 |
| A(6-10-12)  | 116.87 |
| A(6-10-20)  | 124.72 |
| A(11-7-37)  | 116.61 |
| A(7-11-13)  | 116.61 |
| A(7-11-21)  | 124.62 |
| A(9-8-32)   | 121.81 |
| A(8-9-33)   | 121.65 |
| A(8-32-34)  | 175.85 |
| A(9-33-35)  | 175.40 |
| A(12-10-20) | 118.41 |
| A(10-12-14) | 122.73 |
| A(10-12-38) | 118.05 |
| A(10-20-18) | 118.02 |
| A(13-11-21) | 118.73 |
| A(11-13-15) | 122.84 |
| A(11-13-39) | 117.85 |
| A(11-21-19) | 116.84 |
| A(14-12-38) | 119.21 |
| A(12-14-16) | 118.38 |
| A(12-14-40) | 120.16 |
| A(15-13-39) | 119.31 |
| A(13-15-17) | 118.39 |
| A(13-15-41) | 120.25 |
| A(16-14-40) | 121.46 |
| A(14-16-18) | 120.56 |
| A(14-16-22) | 124.01 |
| A(17-15-41) | 121.36 |
| A(15-17-19) | 120.87 |
| A(15-17-23) | 123.28 |
| A(18-16-22) | 115.43 |
| A(16-18-20) | 121.79 |
| A(16-18-42) | 119.30 |
| A(16-22-24) | 118.42 |
| A(19-17-23) | 115.85 |
| A(17-19-21) | 122.33 |
| A(17-19-43) | 119.54 |
| A(17-23-25) | 118.61 |
| A(20-18-42) | 118.88 |
| A(21-19-43) | 118.13 |
| A(22-24-30) | 105.39 |
| A(22-24-26) | 111.34 |
| A(22-24-28) | 111.38 |
| A(23-25-27) | 111.58 |
| A(23-25-31) | 105.39 |
| A(23-25-29) | 111.54 |
| A(30-24-26) | 109.46 |
| A(30-24-28) | 109.43 |

|             |        |
|-------------|--------|
| A(26-24-28) | 109.73 |
| A(27-25-31) | 109.29 |
| A(27-25-29) | 109.63 |
| A(31-25-29) | 109.30 |
| A(44-45-63) | 129.28 |
| A(45-63-53) | 124.19 |
| A(45-63-61) | 118.98 |
| A(46-64-54) | 122.52 |
| A(46-64-62) | 119.44 |
| A(49-47-51) | 122.84 |
| A(47-49-53) | 124.99 |
| A(47-49-79) | 118.39 |
| A(47-51-52) | 117.19 |
| A(47-51-75) | 121.14 |
| A(50-48-52) | 121.88 |
| A(48-50-54) | 125.30 |
| A(48-50-80) | 118.42 |
| A(48-52-51) | 117.09 |
| A(48-52-76) | 121.07 |
| A(53-49-79) | 116.60 |
| A(49-53-55) | 116.61 |
| A(49-53-63) | 124.61 |
| A(54-50-80) | 116.20 |
| A(50-54-64) | 124.72 |
| A(50-54-56) | 116.86 |
| A(52-51-75) | 121.64 |
| A(51-52-76) | 121.81 |
| A(51-75-77) | 175.40 |
| A(52-76-78) | 175.86 |
| A(55-53-63) | 118.73 |
| A(53-55-57) | 122.84 |
| A(53-55-81) | 117.85 |
| A(53-63-61) | 116.84 |
| A(64-54-56) | 118.42 |
| A(54-64-62) | 118.02 |
| A(54-56-58) | 122.72 |
| A(54-56-82) | 118.06 |
| A(57-55-81) | 119.32 |
| A(55-57-59) | 118.39 |
| A(55-57-83) | 120.25 |
| A(58-56-82) | 119.21 |
| A(56-58-60) | 118.39 |
| A(56-58-84) | 120.16 |
| A(59-57-83) | 121.36 |
| A(57-59-61) | 120.87 |
| A(57-59-65) | 123.28 |
| A(60-58-84) | 121.45 |
| A(58-60-62) | 120.55 |
| A(58-60-66) | 124.02 |
| A(61-59-65) | 115.85 |
| A(59-61-63) | 122.33 |
| A(59-61-85) | 119.53 |
| A(59-65-67) | 118.62 |
| A(62-60-66) | 115.43 |
| A(60-62-64) | 121.80 |
| A(60-62-86) | 119.30 |
| A(60-66-68) | 118.42 |
| A(63-61-85) | 118.14 |



|             |        |
|-------------|--------|
| A(64-62-86) | 118.89 |
| A(65-67-73) | 105.39 |
| A(65-67-69) | 111.57 |
| A(65-67-71) | 111.54 |
| A(66-68-70) | 111.33 |
| A(66-68-74) | 105.40 |
| A(66-68-72) | 111.38 |
| A(73-67-69) | 109.29 |
| A(73-67-71) | 109.30 |
| A(69-67-71) | 109.63 |
| A(70-68-74) | 109.47 |
| A(70-68-72) | 109.73 |
| A(74-68-72) | 109.43 |

### Complex 4D

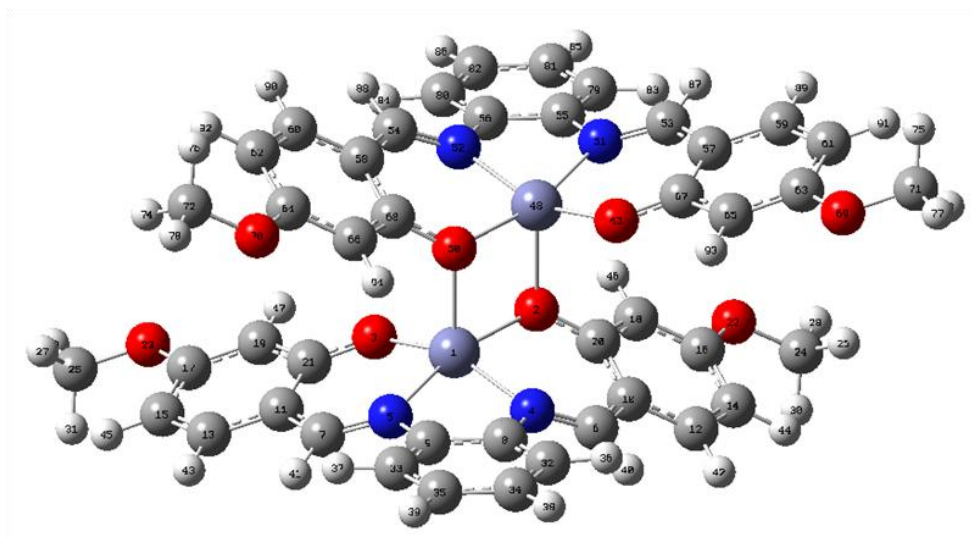

### Cartesian coordinates

|    |    | X      | Y      | Z      |
|----|----|--------|--------|--------|
| 1  | Zn | 1.040  | 0.708  | -0.928 |
| 2  | O  | -0.679 | -0.389 | -1.101 |
| 3  | O  | 2.342  | -0.748 | -1.170 |
| 4  | N  | -0.079 | 2.357  | -1.477 |
| 5  | N  | 2.519  | 2.133  | -1.086 |
| 6  | C  | -1.192 | 2.326  | -2.166 |
| 7  | C  | 3.787  | 1.877  | -1.323 |
| 8  | C  | 0.599  | 3.553  | -1.201 |
| 9  | C  | 2.007  | 3.431  | -0.980 |
| 10 | C  | -1.966 | 1.158  | -2.457 |
| 11 | C  | 4.373  | 0.583  | -1.423 |
| 12 | C  | -3.087 | 1.318  | -3.309 |
| 13 | C  | 5.775  | 0.528  | -1.650 |
| 14 | C  | -3.917 | 0.268  | -3.663 |
| 15 | C  | 6.473  | -0.657 | -1.777 |
| 16 | C  | -3.628 | -1.019 | -3.147 |
| 17 | C  | 5.745  | -1.876 | -1.690 |

|    |    |        |        |        |
|----|----|--------|--------|--------|
| 18 | C  | -2.530 | -1.218 | -2.306 |
| 19 | C  | 4.370  | -1.873 | -1.486 |
| 20 | C  | -1.687 | -0.158 | -1.923 |
| 21 | C  | 3.622  | -0.672 | -1.345 |
| 22 | O  | -4.367 | -2.132 | -3.423 |
| 23 | O  | 6.327  | -3.109 | -1.800 |
| 24 | C  | -5.495 | -1.991 | -4.288 |
| 25 | C  | 7.735  | -3.172 | -2.024 |
| 26 | H  | -6.249 | -1.306 | -3.863 |
| 27 | H  | 8.301  | -2.714 | -1.195 |
| 28 | H  | -5.927 | -2.996 | -4.374 |
| 29 | H  | 7.977  | -4.240 | -2.080 |
| 30 | H  | -5.197 | -1.635 | -5.289 |
| 31 | H  | 8.019  | -2.685 | -2.974 |
| 32 | C  | -0.013 | 4.812  | -1.081 |
| 33 | C  | 2.748  | 4.577  | -0.642 |
| 34 | C  | 0.745  | 5.942  | -0.770 |
| 35 | C  | 2.125  | 5.824  | -0.550 |
| 36 | H  | -1.097 | 4.895  | -1.192 |
| 37 | H  | 3.814  | 4.485  | -0.422 |
| 38 | H  | 0.255  | 6.912  | -0.667 |
| 39 | H  | 2.713  | 6.703  | -0.278 |
| 40 | H  | -1.569 | 3.265  | -2.607 |
| 41 | H  | 4.477  | 2.723  | -1.488 |
| 42 | H  | -3.300 | 2.319  | -3.698 |
| 43 | H  | 6.319  | 1.476  | -1.717 |
| 44 | H  | -4.770 | 0.441  | -4.317 |
| 45 | H  | 7.549  | -0.645 | -1.944 |
| 46 | H  | -2.322 | -2.218 | -1.921 |
| 47 | H  | 3.830  | -2.819 | -1.435 |
| 48 | Zn | -1.040 | -0.708 | 0.928  |
| 49 | O  | -2.342 | 0.748  | 1.170  |
| 50 | O  | 0.679  | 0.389  | 1.101  |
| 51 | N  | -2.519 | -2.133 | 1.086  |
| 52 | N  | 0.079  | -2.357 | 1.477  |
| 53 | C  | -3.787 | -1.877 | 1.323  |
| 54 | C  | 1.192  | -2.326 | 2.166  |
| 55 | C  | -2.007 | -3.431 | 0.980  |
| 56 | C  | -0.599 | -3.553 | 1.201  |
| 57 | C  | -4.373 | -0.583 | 1.423  |
| 58 | C  | 1.966  | -1.158 | 2.457  |
| 59 | C  | -5.775 | -0.528 | 1.650  |
| 60 | C  | 3.087  | -1.318 | 3.309  |
| 61 | C  | -6.473 | 0.657  | 1.777  |
| 62 | C  | 3.917  | -0.268 | 3.663  |
| 63 | C  | -5.745 | 1.876  | 1.690  |
| 64 | C  | 3.628  | 1.019  | 3.147  |
| 65 | C  | -4.370 | 1.873  | 1.486  |
| 66 | C  | 2.530  | 1.218  | 2.306  |
| 67 | C  | -3.622 | 0.672  | 1.345  |
| 68 | C  | 1.687  | 0.158  | 1.923  |
| 69 | O  | -6.327 | 3.109  | 1.800  |
| 70 | O  | 4.367  | 2.132  | 3.423  |
| 71 | C  | -7.735 | 3.172  | 2.024  |
| 72 | C  | 5.495  | 1.991  | 4.288  |
| 73 | H  | -8.301 | 2.714  | 1.195  |
| 74 | H  | 6.249  | 1.306  | 3.863  |
| 75 | H  | -8.019 | 2.685  | 2.974  |

|    |   |        |        |       |
|----|---|--------|--------|-------|
| 76 | H | 5.197  | 1.635  | 5.289 |
| 77 | H | -7.977 | 4.240  | 2.080 |
| 78 | H | 5.927  | 2.996  | 4.374 |
| 79 | C | -2.748 | -4.577 | 0.642 |
| 80 | C | 0.013  | -4.812 | 1.081 |
| 81 | C | -2.125 | -5.824 | 0.550 |
| 82 | C | -0.745 | -5.942 | 0.770 |
| 83 | H | -3.814 | -4.485 | 0.422 |
| 84 | H | 1.097  | -4.895 | 1.192 |
| 85 | H | -2.713 | -6.703 | 0.278 |
| 86 | H | -0.255 | -6.912 | 0.667 |
| 87 | H | -4.477 | -2.723 | 1.488 |
| 88 | H | 1.569  | -3.265 | 2.607 |
| 89 | H | -6.319 | -1.476 | 1.717 |
| 90 | H | 3.300  | -2.319 | 3.698 |
| 91 | H | -7.549 | 0.645  | 1.944 |
| 92 | H | 4.770  | -0.441 | 4.317 |
| 93 | H | -3.830 | 2.819  | 1.435 |
| 94 | H | 2.322  | 2.218  | 1.921 |

### Structural parameters

|          |       |
|----------|-------|
| R(1-3)   | 1.967 |
| R(1-5)   | 2.060 |
| R(2-20)  | 1.321 |
| R(3-21)  | 1.295 |
| R(4-6)   | 1.310 |
| R(4-8)   | 1.402 |
| R(5-9)   | 1.400 |
| R(5-7)   | 1.315 |
| R(6-10)  | 1.431 |
| R(6-40)  | 1.104 |
| R(7-11)  | 1.424 |
| R(7-41)  | 1.104 |
| R(8-9)   | 1.431 |
| R(8-32)  | 1.405 |
| R(9-33)  | 1.406 |
| R(10-12) | 1.417 |
| R(10-20) | 1.447 |
| R(11-13) | 1.421 |
| R(11-21) | 1.464 |
| R(12-14) | 1.385 |
| R(12-42) | 1.094 |
| R(13-15) | 1.381 |
| R(13-43) | 1.095 |
| R(14-16) | 1.416 |
| R(14-44) | 1.089 |
| R(15-17) | 1.422 |
| R(15-45) | 1.089 |
| R(16-18) | 1.398 |
| R(16-22) | 1.365 |
| R(17-19) | 1.391 |
| R(17-23) | 1.368 |
| R(18-20) | 1.408 |
| R(18-46) | 1.091 |
| R(19-21) | 1.422 |
| R(19-47) | 1.091 |
| R(22-24) | 1.428 |

|          |       |
|----------|-------|
| R(23-25) | 1.427 |
| R(24-30) | 1.104 |
| R(24-28) | 1.097 |
| R(24-26) | 1.104 |
| R(25-29) | 1.097 |
| R(25-31) | 1.104 |
| R(25-27) | 1.104 |
| R(32-34) | 1.396 |
| R(32-36) | 1.092 |
| R(33-35) | 1.396 |
| R(33-37) | 1.092 |
| R(34-35) | 1.402 |
| R(34-38) | 1.092 |
| R(35-39) | 1.092 |
| R(48-49) | 1.967 |
| R(48-51) | 2.060 |
| R(49-67) | 1.295 |
| R(50-68) | 1.321 |
| R(51-55) | 1.400 |
| R(51-53) | 1.315 |
| R(52-54) | 1.310 |
| R(52-56) | 1.402 |
| R(53-57) | 1.424 |
| R(53-87) | 1.104 |
| R(54-58) | 1.431 |
| R(54-88) | 1.104 |
| R(55-56) | 1.431 |
| R(55-79) | 1.406 |
| R(56-80) | 1.405 |
| R(57-59) | 1.421 |
| R(57-67) | 1.464 |
| R(58-68) | 1.447 |
| R(58-60) | 1.417 |
| R(59-61) | 1.381 |
| R(59-89) | 1.095 |
| R(60-62) | 1.385 |
| R(60-90) | 1.094 |
| R(61-63) | 1.422 |
| R(61-91) | 1.089 |
| R(62-64) | 1.416 |
| R(62-92) | 1.089 |
| R(63-65) | 1.391 |
| R(63-69) | 1.368 |
| R(64-66) | 1.398 |
| R(64-70) | 1.365 |
| R(65-67) | 1.422 |
| R(65-93) | 1.091 |
| R(66-68) | 1.407 |
| R(66-94) | 1.091 |
| R(69-71) | 1.427 |
| R(70-72) | 1.428 |
| R(71-75) | 1.104 |
| R(71-77) | 1.097 |
| R(71-73) | 1.104 |
| R(72-78) | 1.097 |
| R(72-76) | 1.104 |
| R(72-74) | 1.104 |
| R(79-81) | 1.396 |

|             |        |
|-------------|--------|
| R(79-83)    | 1.092  |
| R(80-82)    | 1.396  |
| R(80-84)    | 1.092  |
| R(81-82)    | 1.402  |
| R(81-85)    | 1.092  |
| R(82-86)    | 1.092  |
| A(3-1-5)    | 91.57  |
| A(1-3-21)   | 128.85 |
| A(1-5-9)    | 111.91 |
| A(1-5-7)    | 124.85 |
| A(2-20-10)  | 122.42 |
| A(2-20-18)  | 119.60 |
| A(3-21-11)  | 124.39 |
| A(3-21-19)  | 118.92 |
| A(6-4-8)    | 122.34 |
| A(4-6-10)   | 125.92 |
| A(4-6-40)   | 118.63 |
| A(4-8-9)    | 115.69 |
| A(4-8-32)   | 124.79 |
| A(9-5-7)    | 123.17 |
| A(5-9-8)    | 115.31 |
| A(5-9-33)   | 125.56 |
| A(5-7-11)   | 125.88 |
| A(5-7-41)   | 118.67 |
| A(10-6-40)  | 115.41 |
| A(6-10-12)  | 117.25 |
| A(6-10-20)  | 124.23 |
| A(11-7-41)  | 115.43 |
| A(7-11-13)  | 116.85 |
| A(7-11-21)  | 124.36 |
| A(9-8-32)   | 119.47 |
| A(8-9-33)   | 119.09 |
| A(8-32-34)  | 120.51 |
| A(8-32-36)  | 119.46 |
| A(9-33-35)  | 120.56 |
| A(9-33-37)  | 119.59 |
| A(12-10-20) | 118.52 |
| A(10-12-14) | 122.82 |
| A(10-12-42) | 118.10 |
| A(10-20-18) | 117.97 |
| A(13-11-21) | 118.77 |
| A(11-13-15) | 123.11 |
| A(11-13-43) | 117.84 |
| A(11-21-19) | 116.69 |
| A(14-12-42) | 119.07 |
| A(12-14-16) | 118.27 |
| A(12-14-44) | 120.17 |
| A(15-13-43) | 119.05 |
| A(13-15-17) | 118.11 |
| A(13-15-45) | 120.27 |
| A(16-14-44) | 121.55 |
| A(14-16-18) | 120.63 |
| A(14-16-22) | 123.83 |
| A(17-15-45) | 121.62 |
| A(15-17-19) | 120.85 |
| A(15-17-23) | 123.37 |
| A(18-16-22) | 115.54 |
| A(16-18-20) | 121.77 |

|             |        |
|-------------|--------|
| A(16-18-46) | 119.48 |
| A(16-22-24) | 118.03 |
| A(19-17-23) | 115.78 |
| A(17-19-21) | 122.46 |
| A(17-19-47) | 119.59 |
| A(17-23-25) | 118.16 |
| A(20-18-46) | 118.75 |
| A(21-19-47) | 117.95 |
| A(22-24-30) | 111.57 |
| A(22-24-28) | 105.55 |
| A(22-24-26) | 111.56 |
| A(23-25-29) | 105.56 |
| A(23-25-31) | 111.70 |
| A(23-25-27) | 111.71 |
| A(30-24-28) | 109.28 |
| A(30-24-26) | 109.46 |
| A(28-24-26) | 109.32 |
| A(29-25-31) | 109.19 |
| A(29-25-27) | 109.21 |
| A(31-25-27) | 109.36 |
| A(34-32-36) | 119.99 |
| A(32-34-35) | 120.09 |
| A(32-34-38) | 119.74 |
| A(35-33-37) | 119.83 |
| A(33-35-34) | 120.26 |
| A(33-35-39) | 119.64 |
| A(35-34-38) | 120.15 |
| A(34-35-39) | 120.07 |
| A(49-48-51) | 91.57  |
| A(48-49-67) | 128.85 |
| A(48-51-55) | 111.91 |
| A(48-51-53) | 124.85 |
| A(49-67-57) | 124.39 |
| A(49-67-65) | 118.92 |
| A(50-68-58) | 122.42 |
| A(50-68-66) | 119.60 |
| A(55-51-53) | 123.17 |
| A(51-55-56) | 115.31 |
| A(51-55-79) | 125.56 |
| A(51-53-57) | 125.88 |
| A(51-53-87) | 118.67 |
| A(54-52-56) | 122.34 |
| A(52-54-58) | 125.92 |
| A(52-54-88) | 118.63 |
| A(52-56-55) | 115.69 |
| A(52-56-80) | 124.79 |
| A(57-53-87) | 115.43 |
| A(53-57-59) | 116.85 |
| A(53-57-67) | 124.36 |
| A(58-54-88) | 115.41 |
| A(54-58-68) | 124.23 |
| A(54-58-60) | 117.25 |
| A(56-55-79) | 119.09 |
| A(55-56-80) | 119.47 |
| A(55-79-81) | 120.56 |
| A(55-79-83) | 119.60 |
| A(56-80-82) | 120.50 |
| A(56-80-84) | 119.46 |

|             |        |
|-------------|--------|
| A(59-57-67) | 118.77 |
| A(57-59-61) | 123.11 |
| A(57-59-89) | 117.84 |
| A(57-67-65) | 116.69 |
| A(68-58-60) | 118.52 |
| A(58-68-66) | 117.97 |
| A(58-60-62) | 122.82 |
| A(58-60-90) | 118.10 |
| A(61-59-89) | 119.05 |
| A(59-61-63) | 118.11 |
| A(59-61-91) | 120.27 |
| A(62-60-90) | 119.07 |
| A(60-62-64) | 118.27 |
| A(60-62-92) | 120.17 |
| A(63-61-91) | 121.62 |
| A(61-63-65) | 120.85 |
| A(61-63-69) | 123.37 |
| A(64-62-92) | 121.55 |
| A(62-64-66) | 120.62 |
| A(62-64-70) | 123.83 |
| A(65-63-69) | 115.78 |
| A(63-65-67) | 122.46 |
| A(63-65-93) | 119.59 |
| A(63-69-71) | 118.16 |
| A(66-64-70) | 115.54 |
| A(64-66-68) | 121.78 |
| A(64-66-94) | 119.47 |
| A(64-70-72) | 118.03 |
| A(67-65-93) | 117.95 |
| A(68-66-94) | 118.74 |
| A(69-71-75) | 111.70 |
| A(69-71-77) | 105.56 |
| A(69-71-73) | 111.71 |
| A(70-72-78) | 105.55 |
| A(70-72-76) | 111.57 |
| A(70-72-74) | 111.56 |
| A(75-71-77) | 109.19 |
| A(75-71-73) | 109.36 |
| A(77-71-73) | 109.21 |
| A(78-72-76) | 109.28 |
| A(78-72-74) | 109.32 |
| A(76-72-74) | 109.46 |
| A(81-79-83) | 119.82 |
| A(79-81-82) | 120.25 |
| A(79-81-85) | 119.64 |
| A(82-80-84) | 119.99 |
| A(80-82-81) | 120.10 |
| A(80-82-86) | 119.74 |
| A(82-81-85) | 120.08 |
| A(81-82-86) | 120.14 |

## Complex 5D

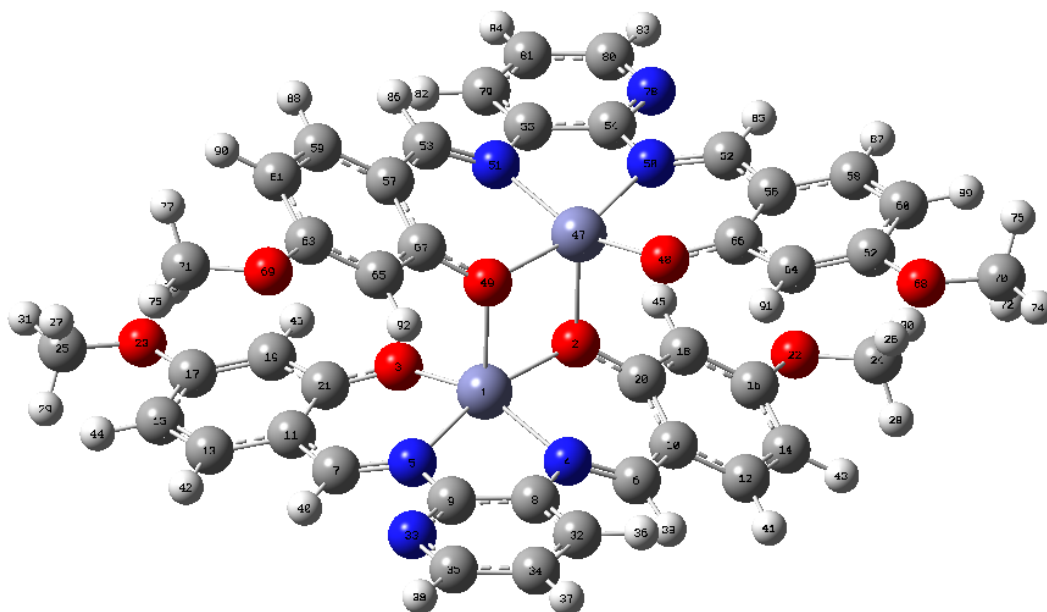

## Cartesian coordinates

|    |    | X      | Y      | Z      |
|----|----|--------|--------|--------|
| 1  | Zn | -0.990 | -0.884 | 0.826  |
| 2  | O  | 0.738  | -1.109 | -0.229 |
| 3  | O  | -2.283 | -1.387 | -0.576 |
| 4  | N  | 0.168  | -1.122 | 2.540  |
| 5  | N  | -2.457 | -0.902 | 2.249  |
| 6  | C  | 1.314  | -1.751 | 2.603  |
| 7  | C  | -3.748 | -1.045 | 2.021  |
| 8  | C  | -0.551 | -0.773 | 3.690  |
| 9  | C  | -1.971 | -0.658 | 3.537  |
| 10 | C  | 2.108  | -2.158 | 1.481  |
| 11 | C  | -4.334 | -1.305 | 0.752  |
| 12 | C  | 3.273  | -2.924 | 1.759  |
| 13 | C  | -5.755 | -1.429 | 0.718  |
| 14 | C  | 4.104  | -3.383 | 0.752  |
| 15 | C  | -6.440 | -1.712 | -0.445 |
| 16 | C  | 3.781  | -3.079 | -0.587 |
| 17 | C  | -5.703 | -1.895 | -1.642 |
| 18 | C  | 2.652  | -2.332 | -0.898 |
| 19 | C  | -4.326 | -1.790 | -1.659 |
| 20 | C  | 1.789  | -1.836 | 0.111  |
| 21 | C  | -3.571 | -1.482 | -0.481 |
| 22 | O  | 4.623  | -3.547 | -1.643 |
| 23 | O  | -6.397 | -2.197 | -2.855 |
| 24 | C  | 5.986  | -3.528 | -1.211 |
| 25 | C  | -7.786 | -1.896 | -2.698 |
| 26 | H  | 6.194  | -2.597 | -0.727 |
| 27 | H  | -7.896 | -0.893 | -2.343 |
| 28 | H  | 6.154  | -4.332 | -0.524 |
| 29 | H  | -8.220 | -2.573 | -1.992 |
| 30 | H  | 6.631  | -3.642 | -2.058 |
| 31 | H  | -8.282 | -1.998 | -3.640 |
| 32 | C  | -0.010 | -0.497 | 4.953  |
| 33 | N  | -2.792 | -0.331 | 4.543  |
| 34 | C  | -0.871 | -0.162 | 6.001  |



|    |    |        |        |        |
|----|----|--------|--------|--------|
| 35 | C  | -2.248 | -0.100 | 5.747  |
| 36 | H  | 1.071  | -0.517 | 5.105  |
| 37 | H  | -0.483 | 0.069  | 6.994  |
| 38 | H  | -2.948 | 0.168  | 6.546  |
| 39 | H  | 1.705  | -2.048 | 3.592  |
| 40 | H  | -4.425 | -0.972 | 2.888  |
| 41 | H  | 3.503  | -3.150 | 2.805  |
| 42 | H  | -6.300 | -1.290 | 1.658  |
| 43 | H  | 4.995  | -3.966 | 0.989  |
| 44 | H  | -7.528 | -1.800 | -0.446 |
| 45 | H  | 2.400  | -2.095 | -1.933 |
| 46 | H  | -3.753 | -1.934 | -2.577 |
| 47 | Zn | 0.990  | 0.884  | -0.826 |
| 48 | O  | 2.283  | 1.387  | 0.576  |
| 49 | O  | -0.738 | 1.109  | 0.229  |
| 50 | N  | 2.457  | 0.902  | -2.249 |
| 51 | N  | -0.168 | 1.122  | -2.540 |
| 52 | C  | 3.748  | 1.045  | -2.021 |
| 53 | C  | -1.314 | 1.751  | -2.603 |
| 54 | C  | 1.971  | 0.658  | -3.537 |
| 55 | C  | 0.551  | 0.773  | -3.690 |
| 56 | C  | 4.334  | 1.305  | -0.752 |
| 57 | C  | -2.108 | 2.158  | -1.481 |
| 58 | C  | 5.755  | 1.429  | -0.718 |
| 59 | C  | -3.273 | 2.924  | -1.759 |
| 60 | C  | 6.440  | 1.712  | 0.445  |
| 61 | C  | -4.104 | 3.383  | -0.752 |
| 62 | C  | 5.703  | 1.895  | 1.642  |
| 63 | C  | -3.781 | 3.079  | 0.587  |
| 64 | C  | 4.326  | 1.790  | 1.659  |
| 65 | C  | -2.652 | 2.332  | 0.898  |
| 66 | C  | 3.571  | 1.482  | 0.481  |
| 67 | C  | -1.789 | 1.836  | -0.111 |
| 68 | O  | 6.397  | 2.197  | 2.855  |
| 69 | O  | -4.623 | 3.547  | 1.643  |
| 70 | C  | 7.786  | 1.896  | 2.698  |
| 71 | C  | -5.986 | 3.528  | 1.211  |
| 72 | H  | 7.896  | 0.893  | 2.343  |
| 73 | H  | -6.194 | 2.597  | 0.727  |
| 74 | H  | 8.282  | 1.998  | 3.640  |
| 75 | H  | -6.631 | 3.642  | 2.058  |
| 76 | H  | 8.220  | 2.573  | 1.992  |
| 77 | H  | -6.154 | 4.332  | 0.524  |
| 78 | N  | 2.792  | 0.331  | -4.543 |
| 79 | C  | 0.010  | 0.497  | -4.953 |
| 80 | C  | 2.248  | 0.100  | -5.747 |
| 81 | C  | 0.871  | 0.162  | -6.001 |
| 82 | H  | -1.071 | 0.517  | -5.105 |
| 83 | H  | 2.948  | -0.168 | -6.546 |
| 84 | H  | 0.483  | -0.069 | -6.994 |
| 85 | H  | 4.425  | 0.972  | -2.888 |
| 86 | H  | -1.705 | 2.048  | -3.592 |
| 87 | H  | 6.300  | 1.290  | -1.658 |
| 88 | H  | -3.503 | 3.150  | -2.805 |
| 89 | H  | 7.528  | 1.800  | 0.446  |
| 90 | H  | -4.995 | 3.966  | -0.989 |
| 91 | H  | 3.753  | 1.934  | 2.577  |
| 92 | H  | -2.400 | 2.095  | 1.933  |

## Structural parameters

|          |       |
|----------|-------|
| R(1-3)   | 1.973 |
| R(1-5)   | 2.044 |
| R(2-20)  | 1.322 |
| R(3-21)  | 1.294 |
| R(4-6)   | 1.309 |
| R(4-8)   | 1.400 |
| R(5-9)   | 1.398 |
| R(5-7)   | 1.319 |
| R(6-10)  | 1.434 |
| R(6-39)  | 1.104 |
| R(7-11)  | 1.422 |
| R(7-40)  | 1.101 |
| R(8-9)   | 1.432 |
| R(8-32)  | 1.401 |
| R(9-33)  | 1.340 |
| R(10-20) | 1.442 |
| R(10-12) | 1.421 |
| R(11-13) | 1.427 |
| R(11-21) | 1.460 |
| R(12-14) | 1.384 |
| R(12-41) | 1.095 |
| R(13-15) | 1.379 |
| R(13-42) | 1.095 |
| R(14-16) | 1.410 |
| R(14-43) | 1.091 |
| R(15-17) | 1.418 |
| R(15-44) | 1.091 |
| R(16-18) | 1.389 |
| R(16-22) | 1.430 |
| R(17-19) | 1.381 |
| R(17-23) | 1.430 |
| R(18-20) | 1.418 |
| R(18-45) | 1.092 |
| R(19-21) | 1.433 |
| R(19-46) | 1.092 |
| R(22-24) | 1.430 |
| R(23-25) | 1.430 |
| R(24-28) | 1.070 |
| R(24-30) | 1.070 |
| R(24-26) | 1.070 |
| R(25-31) | 1.070 |
| R(25-29) | 1.070 |
| R(25-27) | 1.070 |
| R(32-34) | 1.397 |
| R(32-36) | 1.092 |
| R(33-35) | 1.341 |
| R(34-35) | 1.401 |
| R(34-37) | 1.091 |
| R(35-38) | 1.095 |
| R(47-48) | 1.973 |
| R(47-50) | 2.044 |
| R(48-66) | 1.294 |
| R(49-67) | 1.322 |
| R(50-54) | 1.398 |
| R(50-52) | 1.319 |
| R(51-53) | 1.309 |

|            |        |
|------------|--------|
| R(51-55)   | 1.400  |
| R(52-56)   | 1.422  |
| R(52-85)   | 1.101  |
| R(53-57)   | 1.434  |
| R(53-86)   | 1.104  |
| R(54-55)   | 1.432  |
| R(54-78)   | 1.340  |
| R(55-79)   | 1.401  |
| R(56-58)   | 1.427  |
| R(56-66)   | 1.460  |
| R(57-67)   | 1.442  |
| R(57-59)   | 1.421  |
| R(58-60)   | 1.379  |
| R(58-87)   | 1.095  |
| R(59-61)   | 1.384  |
| R(59-88)   | 1.095  |
| R(60-62)   | 1.418  |
| R(60-89)   | 1.091  |
| R(61-63)   | 1.410  |
| R(61-90)   | 1.091  |
| R(62-64)   | 1.381  |
| R(62-68)   | 1.430  |
| R(63-65)   | 1.389  |
| R(63-69)   | 1.430  |
| R(64-66)   | 1.433  |
| R(64-91)   | 1.092  |
| R(65-67)   | 1.418  |
| R(65-92)   | 1.092  |
| R(68-70)   | 1.430  |
| R(69-71)   | 1.430  |
| R(70-76)   | 1.070  |
| R(70-74)   | 1.070  |
| R(70-72)   | 1.070  |
| R(71-75)   | 1.070  |
| R(71-77)   | 1.070  |
| R(71-73)   | 1.070  |
| R(78-80)   | 1.341  |
| R(79-81)   | 1.397  |
| R(79-82)   | 1.092  |
| R(80-81)   | 1.401  |
| R(80-83)   | 1.095  |
| R(81-84)   | 1.091  |
| A(3-1-5)   | 91.28  |
| A(1-3-21)  | 128.17 |
| A(1-5-9)   | 112.97 |
| A(1-5-7)   | 125.69 |
| A(2-20-10) | 122.90 |
| A(2-20-18) | 119.55 |
| A(3-21-11) | 124.97 |
| A(3-21-19) | 118.62 |
| A(6-4-8)   | 122.02 |
| A(4-6-10)  | 125.75 |
| A(4-6-39)  | 118.83 |
| A(4-8-9)   | 116.16 |
| A(4-8-32)  | 126.22 |
| A(9-5-7)   | 121.23 |
| A(5-9-8)   | 115.42 |
| A(5-9-33)  | 121.43 |

|             |        |
|-------------|--------|
| A(5-7-11)   | 125.24 |
| A(5-7-40)   | 117.26 |
| A(10-6-39)  | 115.36 |
| A(6-10-20)  | 123.83 |
| A(6-10-12)  | 116.97 |
| A(11-7-40)  | 117.50 |
| A(7-11-13)  | 116.55 |
| A(7-11-21)  | 124.10 |
| A(9-8-32)   | 117.60 |
| A(8-9-33)   | 123.14 |
| A(8-32-34)  | 119.03 |
| A(8-32-36)  | 120.26 |
| A(9-33-35)  | 117.88 |
| A(20-10-12) | 119.19 |
| A(10-20-18) | 117.55 |
| A(10-12-14) | 121.87 |
| A(10-12-41) | 118.09 |
| A(13-11-21) | 119.33 |
| A(11-13-15) | 122.16 |
| A(11-13-42) | 117.64 |
| A(11-21-19) | 116.41 |
| A(14-12-41) | 120.04 |
| A(12-14-16) | 118.81 |
| A(12-14-43) | 120.65 |
| A(15-13-42) | 120.20 |
| A(13-15-17) | 118.71 |
| A(13-15-44) | 120.82 |
| A(16-14-43) | 120.53 |
| A(14-16-18) | 120.97 |
| A(14-16-22) | 119.73 |
| A(17-15-44) | 120.47 |
| A(15-17-19) | 121.26 |
| A(15-17-23) | 119.40 |
| A(18-16-22) | 119.29 |
| A(16-18-20) | 121.58 |
| A(16-18-45) | 121.17 |
| A(16-22-24) | 109.50 |
| A(19-17-23) | 119.34 |
| A(17-19-21) | 122.12 |
| A(17-19-46) | 121.55 |
| A(17-23-25) | 109.50 |
| A(20-18-45) | 117.24 |
| A(21-19-46) | 116.33 |
| A(22-24-28) | 109.47 |
| A(22-24-30) | 109.48 |
| A(22-24-26) | 109.47 |
| A(23-25-31) | 109.47 |
| A(23-25-29) | 109.47 |
| A(23-25-27) | 109.47 |
| A(28-24-30) | 109.47 |
| A(28-24-26) | 109.47 |
| A(30-24-26) | 109.47 |
| A(31-25-29) | 109.47 |
| A(31-25-27) | 109.47 |
| A(29-25-27) | 109.48 |
| A(34-32-36) | 120.69 |
| A(32-34-35) | 118.72 |
| A(32-34-37) | 120.94 |

|             |        |
|-------------|--------|
| A(33-35-34) | 123.61 |
| A(33-35-38) | 115.91 |
| A(35-34-37) | 120.33 |
| A(34-35-38) | 120.47 |
| A(48-47-50) | 91.28  |
| A(47-48-66) | 128.17 |
| A(47-50-54) | 112.97 |
| A(47-50-52) | 125.69 |
| A(48-66-56) | 124.97 |
| A(48-66-64) | 118.62 |
| A(49-67-57) | 122.90 |
| A(49-67-65) | 119.55 |
| A(54-50-52) | 121.23 |
| A(50-54-55) | 115.42 |
| A(50-54-78) | 121.43 |
| A(50-52-56) | 125.24 |
| A(50-52-85) | 117.26 |
| A(53-51-55) | 122.02 |
| A(51-53-57) | 125.75 |
| A(51-53-86) | 118.83 |
| A(51-55-54) | 116.16 |
| A(51-55-79) | 126.22 |
| A(56-52-85) | 117.50 |
| A(52-56-58) | 116.55 |
| A(52-56-66) | 124.10 |
| A(57-53-86) | 115.36 |
| A(53-57-67) | 123.83 |
| A(53-57-59) | 116.97 |
| A(55-54-78) | 123.14 |
| A(54-55-79) | 117.60 |
| A(54-78-80) | 117.88 |
| A(55-79-81) | 119.03 |
| A(55-79-82) | 120.26 |
| A(58-56-66) | 119.33 |
| A(56-58-60) | 122.16 |
| A(56-58-87) | 117.64 |
| A(56-66-64) | 116.41 |
| A(67-57-59) | 119.19 |
| A(57-67-65) | 117.55 |
| A(57-59-61) | 121.87 |
| A(57-59-88) | 118.09 |
| A(60-58-87) | 120.20 |
| A(58-60-62) | 118.71 |
| A(58-60-89) | 120.82 |
| A(61-59-88) | 120.04 |
| A(59-61-63) | 118.81 |
| A(59-61-90) | 120.65 |
| A(62-60-89) | 120.47 |
| A(60-62-64) | 121.26 |
| A(60-62-68) | 119.40 |
| A(63-61-90) | 120.53 |
| A(61-63-65) | 120.97 |
| A(61-63-69) | 119.73 |
| A(64-62-68) | 119.34 |
| A(62-64-66) | 122.12 |
| A(62-64-91) | 121.55 |
| A(62-68-70) | 109.50 |
| A(65-63-69) | 119.29 |

|             |        |
|-------------|--------|
| A(63-65-67) | 121.58 |
| A(63-65-92) | 121.17 |
| A(63-69-71) | 109.50 |
| A(66-64-91) | 116.33 |
| A(67-65-92) | 117.24 |
| A(68-70-76) | 109.47 |
| A(68-70-74) | 109.47 |
| A(68-70-72) | 109.47 |
| A(69-71-75) | 109.48 |
| A(69-71-77) | 109.47 |
| A(69-71-73) | 109.47 |
| A(76-70-74) | 109.47 |
| A(76-70-72) | 109.48 |
| A(74-70-72) | 109.47 |
| A(75-71-77) | 109.47 |
| A(75-71-73) | 109.47 |
| A(77-71-73) | 109.47 |
| A(78-80-81) | 123.61 |
| A(78-80-83) | 115.91 |
| A(81-79-82) | 120.69 |
| A(79-81-80) | 118.72 |
| A(79-81-84) | 120.94 |
| A(81-80-83) | 120.47 |
| A(80-81-84) | 120.33 |

## Complex 6D

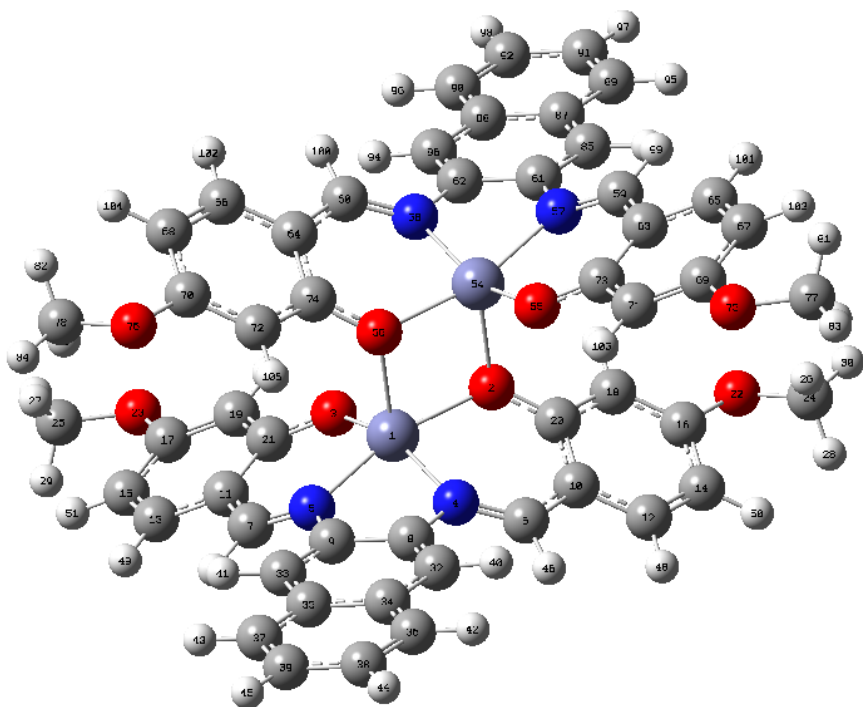

## Cartesian coordinates

|    |    | X      | Y      | Z      |
|----|----|--------|--------|--------|
| 1  | Zn | -0.059 | -0.885 | 1.290  |
| 2  | O  | 0.179  | -1.113 | -0.732 |
| 3  | O  | -1.995 | -1.216 | 1.404  |
| 4  | N  | 1.945  | -1.380 | 1.456  |
| 5  | N  | 0.138  | -1.006 | 3.335  |
| 6  | C  | 2.615  | -2.115 | 0.606  |
| 7  | C  | -0.841 | -1.286 | 4.168  |
| 8  | C  | 2.458  | -1.051 | 2.720  |
| 9  | C  | 1.465  | -0.838 | 3.753  |
| 10 | C  | 2.191  | -2.467 | -0.719 |
| 11 | C  | -2.214 | -1.451 | 3.823  |
| 12 | C  | 3.020  | -3.364 | -1.445 |
| 13 | C  | -3.117 | -1.708 | 4.897  |
| 14 | C  | 2.707  | -3.770 | -2.731 |
| 15 | C  | -4.468 | -1.899 | 4.692  |
| 16 | C  | 1.532  | -3.274 | -3.333 |
| 17 | C  | -4.968 | -1.851 | 3.367  |
| 18 | C  | 0.698  | -2.395 | -2.655 |
| 19 | C  | -4.129 | -1.622 | 2.293  |
| 20 | C  | 0.995  | -1.956 | -1.340 |
| 21 | C  | -2.722 | -1.411 | 2.457  |
| 22 | O  | 1.187  | -3.686 | -4.658 |
| 23 | O  | -6.365 | -2.048 | 3.135  |
| 24 | C  | 2.373  | -3.786 | -5.451 |
| 25 | C  | -7.093 | -1.762 | 4.333  |
| 26 | H  | 2.983  | -2.921 | -5.290 |
| 27 | H  | -6.790 | -0.810 | 4.715  |
| 28 | H  | 2.917  | -4.663 | -5.171 |
| 29 | H  | -6.892 | -2.520 | 5.061  |
| 30 | H  | 2.106  | -3.846 | -6.485 |

|    |    |        |        |        |
|----|----|--------|--------|--------|
| 31 | H  | -8.140 | -1.744 | 4.117  |
| 32 | C  | 3.802  | -0.873 | 3.009  |
| 33 | C  | 1.876  | -0.457 | 5.023  |
| 34 | C  | 4.235  | -0.506 | 4.309  |
| 35 | C  | 3.250  | -0.296 | 5.339  |
| 36 | C  | 5.610  | -0.322 | 4.626  |
| 37 | C  | 3.687  | 0.086  | 6.638  |
| 38 | C  | 6.001  | 0.044  | 5.900  |
| 39 | C  | 5.032  | 0.249  | 6.914  |
| 40 | H  | 4.546  | -0.977 | 2.215  |
| 41 | H  | 1.134  | -0.252 | 5.799  |
| 42 | H  | 6.355  | -0.478 | 3.841  |
| 43 | H  | 2.939  | 0.247  | 7.419  |
| 44 | H  | 7.061  | 0.178  | 6.129  |
| 45 | H  | 5.352  | 0.540  | 7.917  |
| 46 | H  | 3.580  | -2.545 | 0.928  |
| 47 | H  | -0.598 | -1.438 | 5.234  |
| 48 | H  | 3.927  | -3.736 | -0.959 |
| 49 | H  | -2.707 | -1.744 | 5.912  |
| 50 | H  | 3.358  | -4.459 | -3.271 |
| 51 | H  | -5.140 | -2.086 | 5.531  |
| 52 | H  | -0.216 | -2.013 | -3.114 |
| 53 | H  | -4.506 | -1.593 | 1.269  |
| 54 | Zn | 0.059  | 0.885  | -1.290 |
| 55 | O  | 1.995  | 1.216  | -1.404 |
| 56 | O  | -0.179 | 1.113  | 0.732  |
| 57 | N  | -0.138 | 1.006  | -3.335 |
| 58 | N  | -1.945 | 1.380  | -1.456 |
| 59 | C  | 0.841  | 1.286  | -4.168 |
| 60 | C  | -2.615 | 2.115  | -0.606 |
| 61 | C  | -1.465 | 0.838  | -3.753 |
| 62 | C  | -2.458 | 1.051  | -2.720 |
| 63 | C  | 2.214  | 1.451  | -3.823 |
| 64 | C  | -2.191 | 2.467  | 0.719  |
| 65 | C  | 3.117  | 1.708  | -4.897 |
| 66 | C  | -3.020 | 3.364  | 1.445  |
| 67 | C  | 4.468  | 1.899  | -4.692 |
| 68 | C  | -2.707 | 3.770  | 2.731  |
| 69 | C  | 4.968  | 1.851  | -3.367 |
| 70 | C  | -1.532 | 3.274  | 3.333  |
| 71 | C  | 4.129  | 1.622  | -2.293 |
| 72 | C  | -0.698 | 2.395  | 2.655  |
| 73 | C  | 2.722  | 1.411  | -2.457 |
| 74 | C  | -0.995 | 1.956  | 1.340  |
| 75 | O  | 6.365  | 2.048  | -3.135 |
| 76 | O  | -1.187 | 3.686  | 4.658  |
| 77 | C  | 7.093  | 1.762  | -4.333 |
| 78 | C  | -2.373 | 3.786  | 5.451  |
| 79 | H  | 6.790  | 0.810  | -4.715 |
| 80 | H  | -2.983 | 2.921  | 5.290  |
| 81 | H  | 6.892  | 2.520  | -5.061 |
| 82 | H  | -2.917 | 4.663  | 5.171  |
| 83 | H  | 8.140  | 1.744  | -4.117 |
| 84 | H  | -2.106 | 3.846  | 6.485  |
| 85 | C  | -1.876 | 0.457  | -5.023 |
| 86 | C  | -3.802 | 0.873  | -3.009 |
| 87 | C  | -3.250 | 0.296  | -5.339 |
| 88 | C  | -4.235 | 0.506  | -4.309 |



|     |   |        |        |        |
|-----|---|--------|--------|--------|
| 89  | C | -3.687 | -0.086 | -6.638 |
| 90  | C | -5.610 | 0.322  | -4.626 |
| 91  | C | -5.032 | -0.249 | -6.914 |
| 92  | C | -6.001 | -0.044 | -5.900 |
| 93  | H | -1.134 | 0.252  | -5.799 |
| 94  | H | -4.546 | 0.977  | -2.215 |
| 95  | H | -2.939 | -0.247 | -7.419 |
| 96  | H | -6.355 | 0.478  | -3.841 |
| 97  | H | -5.352 | -0.540 | -7.917 |
| 98  | H | -7.061 | -0.178 | -6.129 |
| 99  | H | 0.598  | 1.438  | -5.234 |
| 100 | H | -3.580 | 2.545  | -0.928 |
| 101 | H | 2.707  | 1.744  | -5.912 |
| 102 | H | -3.927 | 3.736  | 0.959  |
| 103 | H | 5.140  | 2.086  | -5.531 |
| 104 | H | -3.358 | 4.459  | 3.271  |
| 105 | H | 4.506  | 1.593  | -1.269 |
| 106 | H | 0.216  | 2.013  | 3.114  |

### Structural parameters

|          |       |
|----------|-------|
| R(1-3)   | 1.968 |
| R(1-5)   | 2.058 |
| R(2-20)  | 1.321 |
| R(3-21)  | 1.294 |
| R(4-6)   | 1.308 |
| R(4-8)   | 1.403 |
| R(5-9)   | 1.401 |
| R(5-7)   | 1.315 |
| R(6-10)  | 1.435 |
| R(6-46)  | 1.104 |
| R(7-11)  | 1.426 |
| R(7-47)  | 1.104 |
| R(8-9)   | 1.448 |
| R(8-32)  | 1.386 |
| R(9-33)  | 1.388 |
| R(10-20) | 1.442 |
| R(10-12) | 1.421 |
| R(11-13) | 1.426 |
| R(11-21) | 1.458 |
| R(12-14) | 1.385 |
| R(12-48) | 1.095 |
| R(13-15) | 1.380 |
| R(13-49) | 1.095 |
| R(14-16) | 1.410 |
| R(14-50) | 1.091 |
| R(15-17) | 1.417 |
| R(15-51) | 1.091 |
| R(16-18) | 1.389 |
| R(16-22) | 1.430 |
| R(17-19) | 1.382 |
| R(17-23) | 1.430 |
| R(18-20) | 1.418 |
| R(18-52) | 1.092 |
| R(19-21) | 1.432 |
| R(19-53) | 1.092 |
| R(22-24) | 1.430 |
| R(23-25) | 1.430 |

|           |       |
|-----------|-------|
| R(24-28)  | 1.070 |
| R(24-30)  | 1.070 |
| R(24-26)  | 1.070 |
| R(25-31)  | 1.070 |
| R(25-29)  | 1.070 |
| R(25-27)  | 1.070 |
| R(32-34)  | 1.419 |
| R(32-40)  | 1.093 |
| R(33-35)  | 1.419 |
| R(33-41)  | 1.093 |
| R(34-35)  | 1.441 |
| R(34-36)  | 1.422 |
| R(35-37)  | 1.423 |
| R(36-38)  | 1.382 |
| R(36-42)  | 1.093 |
| R(37-39)  | 1.382 |
| R(37-43)  | 1.094 |
| R(38-39)  | 1.418 |
| R(38-44)  | 1.092 |
| R(39-45)  | 1.092 |
| R(54-55)  | 1.968 |
| R(54-57)  | 2.058 |
| R(55-73)  | 1.294 |
| R(56-74)  | 1.321 |
| R(57-61)  | 1.401 |
| R(57-59)  | 1.315 |
| R(58-60)  | 1.308 |
| R(58-62)  | 1.403 |
| R(59-63)  | 1.426 |
| R(59-99)  | 1.104 |
| R(60-64)  | 1.435 |
| R(60-100) | 1.104 |
| R(61-62)  | 1.448 |
| R(61-85)  | 1.388 |
| R(62-86)  | 1.386 |
| R(63-65)  | 1.426 |
| R(63-73)  | 1.458 |
| R(64-74)  | 1.442 |
| R(64-66)  | 1.421 |
| R(65-67)  | 1.380 |
| R(65-101) | 1.095 |
| R(66-68)  | 1.385 |
| R(66-102) | 1.095 |
| R(67-69)  | 1.417 |
| R(67-103) | 1.091 |
| R(68-70)  | 1.410 |
| R(68-104) | 1.091 |
| R(69-71)  | 1.382 |
| R(69-75)  | 1.430 |
| R(70-72)  | 1.389 |
| R(70-76)  | 1.430 |
| R(71-73)  | 1.432 |
| R(71-105) | 1.092 |
| R(72-74)  | 1.418 |
| R(72-106) | 1.092 |
| R(75-77)  | 1.430 |
| R(76-78)  | 1.430 |
| R(77-81)  | 1.070 |

|             |        |
|-------------|--------|
| R(77-83)    | 1.070  |
| R(77-79)    | 1.070  |
| R(78-84)    | 1.070  |
| R(78-82)    | 1.070  |
| R(78-80)    | 1.070  |
| R(85-87)    | 1.419  |
| R(85-93)    | 1.093  |
| R(86-88)    | 1.419  |
| R(86-94)    | 1.093  |
| R(87-88)    | 1.441  |
| R(87-89)    | 1.423  |
| R(88-90)    | 1.422  |
| R(89-91)    | 1.382  |
| R(89-95)    | 1.094  |
| R(90-92)    | 1.382  |
| R(90-96)    | 1.093  |
| R(91-92)    | 1.418  |
| R(91-97)    | 1.092  |
| R(92-98)    | 1.092  |
| A(3-1-5)    | 91.52  |
| A(1-3-21)   | 128.68 |
| A(1-5-9)    | 112.31 |
| A(1-5-7)    | 124.81 |
| A(2-20-10)  | 122.73 |
| A(2-20-18)  | 119.66 |
| A(3-21-11)  | 124.83 |
| A(3-21-19)  | 118.74 |
| A(6-4-8)    | 121.98 |
| A(4-6-10)   | 125.89 |
| A(4-6-46)   | 118.54 |
| A(4-8-9)    | 115.24 |
| A(4-8-32)   | 124.87 |
| A(9-5-7)    | 122.77 |
| A(5-9-8)    | 114.78 |
| A(5-9-33)   | 125.87 |
| A(5-7-11)   | 126.02 |
| A(5-7-47)   | 118.51 |
| A(10-6-46)  | 115.53 |
| A(6-10-20)  | 123.77 |
| A(6-10-12)  | 117.03 |
| A(11-7-47)  | 115.44 |
| A(7-11-13)  | 116.65 |
| A(7-11-21)  | 123.98 |
| A(9-8-32)   | 119.84 |
| A(8-9-33)   | 119.33 |
| A(8-32-34)  | 121.34 |
| A(8-32-40)  | 119.81 |
| A(9-33-35)  | 121.45 |
| A(9-33-41)  | 120.02 |
| A(20-10-12) | 119.20 |
| A(10-20-18) | 117.61 |
| A(10-12-14) | 121.86 |
| A(10-12-48) | 118.10 |
| A(13-11-21) | 119.35 |
| A(11-13-15) | 122.18 |
| A(11-13-49) | 117.82 |
| A(11-21-19) | 116.43 |
| A(14-12-48) | 120.04 |

|             |        |
|-------------|--------|
| A(12-14-16) | 118.81 |
| A(12-14-50) | 120.65 |
| A(15-13-49) | 120.00 |
| A(13-15-17) | 118.68 |
| A(13-15-51) | 120.80 |
| A(16-14-50) | 120.54 |
| A(14-16-18) | 120.98 |
| A(14-16-22) | 119.69 |
| A(17-15-51) | 120.52 |
| A(15-17-19) | 121.21 |
| A(15-17-23) | 119.44 |
| A(18-16-22) | 119.33 |
| A(16-18-20) | 121.53 |
| A(16-18-52) | 121.26 |
| A(16-22-24) | 109.50 |
| A(19-17-23) | 119.35 |
| A(17-19-21) | 122.14 |
| A(17-19-53) | 121.56 |
| A(17-23-25) | 109.50 |
| A(20-18-52) | 117.21 |
| A(21-19-53) | 116.30 |
| A(22-24-28) | 109.47 |
| A(22-24-30) | 109.47 |
| A(22-24-26) | 109.47 |
| A(23-25-31) | 109.48 |
| A(23-25-29) | 109.46 |
| A(23-25-27) | 109.47 |
| A(28-24-30) | 109.47 |
| A(28-24-26) | 109.47 |
| A(30-24-26) | 109.47 |
| A(31-25-29) | 109.47 |
| A(31-25-27) | 109.47 |
| A(29-25-27) | 109.47 |
| A(34-32-40) | 118.81 |
| A(32-34-35) | 118.93 |
| A(32-34-36) | 122.18 |
| A(35-33-41) | 118.51 |
| A(33-35-34) | 119.10 |
| A(33-35-37) | 122.14 |
| A(35-34-36) | 118.88 |
| A(34-35-37) | 118.75 |
| A(34-36-38) | 120.88 |
| A(34-36-42) | 118.70 |
| A(35-37-39) | 120.90 |
| A(35-37-43) | 118.72 |
| A(38-36-42) | 120.41 |
| A(36-38-39) | 120.25 |
| A(36-38-44) | 120.05 |
| A(39-37-43) | 120.38 |
| A(37-39-38) | 120.33 |
| A(37-39-45) | 120.01 |
| A(39-38-44) | 119.69 |
| A(38-39-45) | 119.66 |
| A(55-54-57) | 91.52  |
| A(54-55-73) | 128.68 |
| A(54-57-61) | 112.31 |
| A(54-57-59) | 124.81 |
| A(55-73-63) | 124.83 |

|              |        |
|--------------|--------|
| A(55-73-71)  | 118.74 |
| A(56-74-64)  | 122.73 |
| A(56-74-72)  | 119.66 |
| A(61-57-59)  | 122.77 |
| A(57-61-62)  | 114.78 |
| A(57-61-85)  | 125.87 |
| A(57-59-63)  | 126.02 |
| A(57-59-99)  | 118.51 |
| A(60-58-62)  | 121.98 |
| A(58-60-64)  | 125.89 |
| A(58-60-100) | 118.54 |
| A(58-62-61)  | 115.24 |
| A(58-62-86)  | 124.87 |
| A(63-59-99)  | 115.44 |
| A(59-63-65)  | 116.65 |
| A(59-63-73)  | 123.98 |
| A(64-60-100) | 115.53 |
| A(60-64-74)  | 123.77 |
| A(60-64-66)  | 117.03 |
| A(62-61-85)  | 119.33 |
| A(61-62-86)  | 119.84 |
| A(61-85-87)  | 121.45 |
| A(61-85-93)  | 120.02 |
| A(62-86-88)  | 121.34 |
| A(62-86-94)  | 119.81 |
| A(65-63-73)  | 119.35 |
| A(63-65-67)  | 122.18 |
| A(63-65-101) | 117.82 |
| A(63-73-71)  | 116.43 |
| A(74-64-66)  | 119.20 |
| A(64-74-72)  | 117.61 |
| A(64-66-68)  | 121.86 |
| A(64-66-102) | 118.10 |
| A(67-65-101) | 120.00 |
| A(65-67-69)  | 118.68 |
| A(65-67-103) | 120.80 |
| A(68-66-102) | 120.04 |
| A(66-68-70)  | 118.81 |
| A(66-68-104) | 120.65 |
| A(69-67-103) | 120.52 |
| A(67-69-71)  | 121.21 |
| A(67-69-75)  | 119.44 |
| A(70-68-104) | 120.54 |
| A(68-70-72)  | 120.98 |
| A(68-70-76)  | 119.69 |
| A(71-69-75)  | 119.35 |
| A(69-71-73)  | 122.14 |
| A(69-71-105) | 121.56 |
| A(69-75-77)  | 109.50 |
| A(72-70-76)  | 119.33 |
| A(70-72-74)  | 121.53 |
| A(70-72-106) | 121.26 |
| A(70-76-78)  | 109.50 |
| A(73-71-105) | 116.30 |
| A(74-72-106) | 117.21 |
| A(75-77-81)  | 109.46 |
| A(75-77-83)  | 109.48 |
| A(75-77-79)  | 109.47 |

|             |        |
|-------------|--------|
| A(76-78-84) | 109.47 |
| A(76-78-82) | 109.47 |
| A(76-78-80) | 109.47 |
| A(81-77-83) | 109.47 |
| A(81-77-79) | 109.47 |
| A(83-77-79) | 109.47 |
| A(84-78-82) | 109.47 |
| A(84-78-80) | 109.47 |
| A(82-78-80) | 109.47 |
| A(87-85-93) | 118.51 |
| A(85-87-88) | 119.10 |
| A(85-87-89) | 122.14 |
| A(88-86-94) | 118.81 |
| A(86-88-87) | 118.93 |
| A(86-88-90) | 122.18 |
| A(88-87-89) | 118.75 |
| A(87-88-90) | 118.88 |
| A(87-89-91) | 120.90 |
| A(87-89-95) | 118.72 |
| A(88-90-92) | 120.88 |
| A(88-90-96) | 118.70 |
| A(91-89-95) | 120.38 |
| A(89-91-92) | 120.33 |
| A(89-91-97) | 120.01 |
| A(92-90-96) | 120.41 |
| A(90-92-91) | 120.25 |
| A(90-92-98) | 120.05 |
| A(92-91-97) | 119.66 |
| A(91-92-98) | 119.69 |

## V. Optimised molecular structure for ZnL.py adducts

### Adduct 1-py

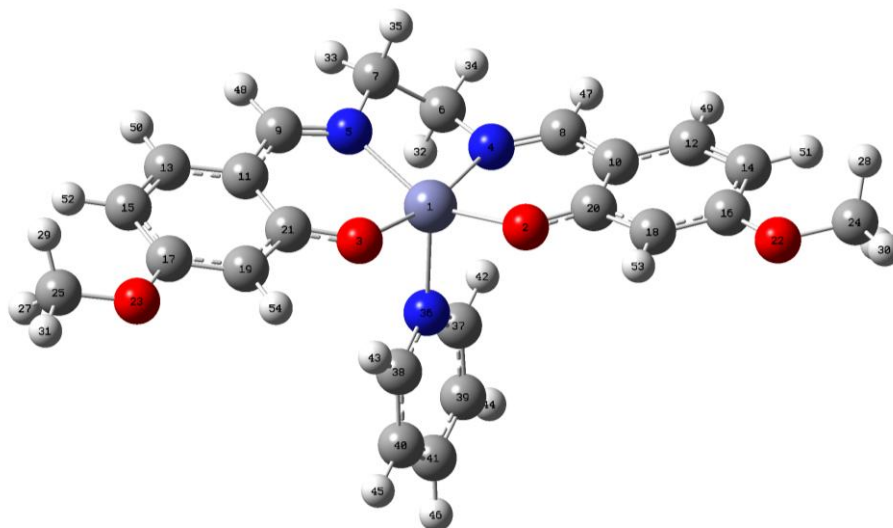

### Cartesian coordinates

|    |    | X      | Y      | Z      |
|----|----|--------|--------|--------|
| 1  | Zn | 0.002  | -0.411 | -0.331 |
| 2  | O  | 1.492  | 0.879  | -0.115 |
| 3  | O  | -1.514 | 0.847  | -0.100 |
| 4  | N  | 1.385  | -1.840 | -0.992 |
| 5  | N  | -1.219 | -1.577 | -1.541 |
| 6  | C  | 0.729  | -3.047 | -1.462 |
| 7  | C  | -0.517 | -2.630 | -2.268 |
| 8  | C  | 2.659  | -1.645 | -1.200 |
| 9  | C  | -2.508 | -1.445 | -1.697 |
| 10 | C  | 3.388  | -0.463 | -0.862 |
| 11 | C  | -3.324 | -0.405 | -1.152 |
| 12 | C  | 4.787  | -0.474 | -1.090 |
| 13 | C  | -4.717 | -0.469 | -1.408 |
| 14 | C  | 5.603  | 0.610  | -0.817 |
| 15 | C  | -5.608 | 0.490  | -0.960 |
| 16 | C  | 4.998  | 1.786  | -0.297 |
| 17 | C  | -5.093 | 1.587  | -0.220 |
| 18 | C  | 3.626  | 1.846  | -0.073 |
| 19 | C  | -3.731 | 1.690  | 0.050  |
| 20 | C  | 2.759  | 0.749  | -0.337 |
| 21 | C  | -2.773 | 0.717  | -0.381 |
| 22 | O  | 5.701  | 2.920  | 0.012  |
| 23 | O  | -5.873 | 2.601  | 0.269  |
| 24 | C  | 7.110  | 2.918  | -0.206 |
| 25 | C  | -7.275 | 2.553  | 0.009  |
| 26 | H  | 7.617  | 2.146  | 0.401  |
| 27 | H  | -7.744 | 1.658  | 0.456  |
| 28 | H  | 7.359  | 2.766  | -1.271 |
| 29 | H  | -7.491 | 2.576  | -1.074 |
| 30 | H  | 7.459  | 3.910  | 0.107  |

|    |   |        |        |        |
|----|---|--------|--------|--------|
| 31 | H | -7.693 | 3.452  | 0.479  |
| 32 | H | 0.397  | -3.643 | -0.590 |
| 33 | H | -1.167 | -3.504 | -2.467 |
| 34 | H | 1.395  | -3.683 | -2.077 |
| 35 | H | -0.181 | -2.229 | -3.243 |
| 36 | N | -0.053 | -0.978 | 1.734  |
| 37 | C | 0.682  | -1.982 | 2.249  |
| 38 | C | -0.734 | -0.181 | 2.584  |
| 39 | C | 0.750  | -2.247 | 3.617  |
| 40 | C | -0.716 | -0.373 | 3.966  |
| 41 | C | 0.034  | -1.427 | 4.494  |
| 42 | H | 1.245  | -2.576 | 1.524  |
| 43 | H | -1.290 | 0.628  | 2.102  |
| 44 | H | 1.358  | -3.075 | 3.983  |
| 45 | H | -1.283 | 0.300  | 4.613  |
| 46 | H | 0.066  | -1.603 | 5.572  |
| 47 | H | 3.245  | -2.452 | -1.685 |
| 48 | H | -3.042 | -2.190 | -2.320 |
| 49 | H | 5.235  | -1.387 | -1.496 |
| 50 | H | -5.095 | -1.317 | -1.988 |
| 51 | H | 6.674  | 0.552  | -1.005 |
| 52 | H | -6.671 | 0.398  | -1.182 |
| 53 | H | 3.185  | 2.764  | 0.317  |
| 54 | H | -3.361 | 2.552  | 0.608  |

### Structural parameters

|          |       |
|----------|-------|
| R(1-3)   | 1.983 |
| R(1-2)   | 1.983 |
| R(1-5)   | 2.077 |
| R(1-4)   | 2.095 |
| R(2-20)  | 1.293 |
| R(3-21)  | 1.297 |
| R(4-8)   | 1.306 |
| R(4-6)   | 1.452 |
| R(5-7)   | 1.459 |
| R(5-9)   | 1.305 |
| R(6-7)   | 1.542 |
| R(6-32)  | 1.107 |
| R(6-34)  | 1.107 |
| R(7-33)  | 1.107 |
| R(7-35)  | 1.106 |
| R(8-10)  | 1.429 |
| R(8-47)  | 1.109 |
| R(9-11)  | 1.430 |
| R(9-48)  | 1.108 |
| R(10-20) | 1.463 |
| R(10-12) | 1.418 |
| R(11-13) | 1.417 |
| R(11-21) | 1.469 |
| R(12-14) | 1.383 |
| R(12-49) | 1.095 |
| R(13-15) | 1.384 |
| R(13-50) | 1.095 |
| R(14-16) | 1.422 |
| R(14-51) | 1.089 |
| R(15-17) | 1.420 |
| R(15-52) | 1.089 |



|            |        |
|------------|--------|
| R(16-18)   | 1.391  |
| R(16-22)   | 1.369  |
| R(17-19)   | 1.392  |
| R(17-23)   | 1.369  |
| R(18-20)   | 1.423  |
| R(18-53)   | 1.091  |
| R(19-54)   | 1.091  |
| R(19-21)   | 1.432  |
| R(22-24)   | 1.426  |
| R(23-25)   | 1.427  |
| R(24-30)   | 1.097  |
| R(24-26)   | 1.104  |
| R(24-28)   | 1.104  |
| R(25-31)   | 1.097  |
| R(25-29)   | 1.104  |
| R(25-27)   | 1.104  |
| R(36-37)   | 1.347  |
| R(36-38)   | 1.349  |
| R(37-39)   | 1.395  |
| R(37-42)   | 1.093  |
| R(38-40)   | 1.396  |
| R(38-43)   | 1.093  |
| R(39-41)   | 1.398  |
| R(39-44)   | 1.091  |
| R(40-41)   | 1.397  |
| R(40-45)   | 1.091  |
| R(41-46)   | 1.092  |
| A(3-1-2)   | 98.57  |
| A(3-1-5)   | 88.55  |
| A(3-1-4)   | 166.83 |
| A(1-3-21)  | 130.82 |
| A(2-1-5)   | 150.55 |
| A(2-1-4)   | 88.97  |
| A(1-2-20)  | 130.72 |
| A(5-1-4)   | 79.72  |
| A(1-5-7)   | 114.36 |
| A(1-5-9)   | 126.39 |
| A(1-4-8)   | 126.34 |
| A(1-4-6)   | 111.79 |
| A(2-20-10) | 124.47 |
| A(2-20-18) | 119.19 |
| A(3-21-11) | 123.66 |
| A(3-21-19) | 121.12 |
| A(8-4-6)   | 120.86 |
| A(4-8-10)  | 125.70 |
| A(4-8-47)  | 118.48 |
| A(4-6-7)   | 108.00 |
| A(4-6-32)  | 109.14 |
| A(4-6-34)  | 112.68 |
| A(7-5-9)   | 119.25 |
| A(5-7-6)   | 108.89 |
| A(5-7-33)  | 112.14 |
| A(5-7-35)  | 108.90 |
| A(5-9-11)  | 126.31 |
| A(5-9-48)  | 118.36 |
| A(7-6-32)  | 108.35 |
| A(7-6-34)  | 110.59 |
| A(6-7-33)  | 110.77 |

|             |        |
|-------------|--------|
| A(6-7-35)   | 108.24 |
| A(32-6-34)  | 108.00 |
| A(33-7-35)  | 107.81 |
| A(10-8-47)  | 115.82 |
| A(8-10-20)  | 123.43 |
| A(8-10-12)  | 117.36 |
| A(11-9-48)  | 115.33 |
| A(9-11-13)  | 117.38 |
| A(9-11-21)  | 122.78 |
| A(20-10-12) | 119.19 |
| A(10-20-18) | 116.34 |
| A(10-12-14) | 122.99 |
| A(10-12-49) | 117.97 |
| A(13-11-21) | 119.83 |
| A(11-13-15) | 122.96 |
| A(11-13-50) | 118.00 |
| A(11-21-19) | 115.22 |
| A(14-12-49) | 119.04 |
| A(12-14-16) | 118.02 |
| A(12-14-51) | 120.30 |
| A(15-13-50) | 119.05 |
| A(13-15-17) | 118.03 |
| A(13-15-52) | 120.29 |
| A(16-14-51) | 121.68 |
| A(14-16-18) | 120.92 |
| A(14-16-22) | 123.35 |
| A(17-15-52) | 121.68 |
| A(15-17-19) | 120.87 |
| A(15-17-23) | 123.43 |
| A(18-16-22) | 115.73 |
| A(16-18-20) | 122.53 |
| A(16-18-53) | 119.52 |
| A(16-22-24) | 118.09 |
| A(19-17-23) | 115.70 |
| A(17-19-54) | 119.31 |
| A(17-19-21) | 123.10 |
| A(17-23-25) | 118.06 |
| A(20-18-53) | 117.95 |
| A(54-19-21) | 117.60 |
| A(22-24-30) | 105.57 |
| A(22-24-26) | 111.76 |
| A(22-24-28) | 111.76 |
| A(23-25-31) | 105.58 |
| A(23-25-29) | 111.70 |
| A(23-25-27) | 111.73 |
| A(30-24-26) | 109.19 |
| A(30-24-28) | 109.15 |
| A(26-24-28) | 109.30 |
| A(31-25-29) | 109.21 |
| A(31-25-27) | 109.20 |
| A(29-25-27) | 109.32 |
| A(37-36-38) | 118.32 |
| A(36-37-39) | 122.89 |
| A(36-37-42) | 115.64 |
| A(36-38-40) | 122.45 |
| A(36-38-43) | 114.56 |
| A(39-37-42) | 121.47 |
| A(37-39-41) | 118.64 |

|             |        |
|-------------|--------|
| A(37-39-44) | 119.99 |
| A(40-38-43) | 122.98 |
| A(38-40-41) | 118.99 |
| A(38-40-45) | 119.70 |
| A(41-39-44) | 121.37 |
| A(39-41-40) | 118.69 |
| A(39-41-46) | 120.60 |
| A(41-40-45) | 121.31 |
| A(40-41-46) | 120.70 |

### Adduct 2-py

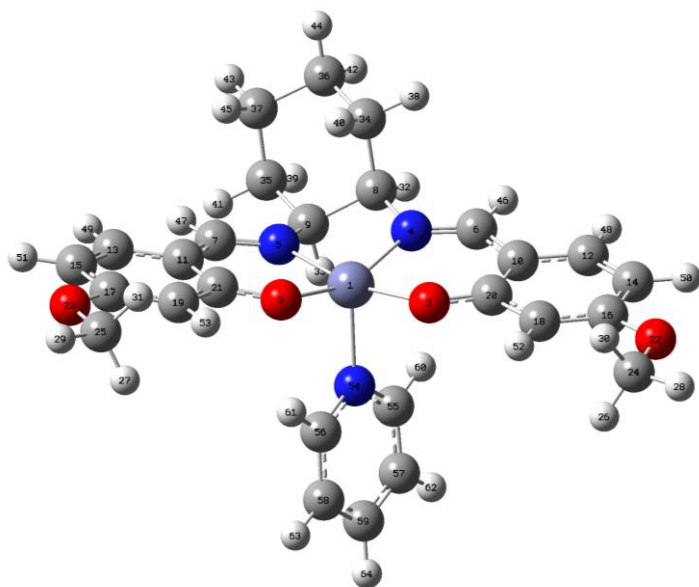

### Cartesian coordinates

|    |    | X      | Y      | Z      |
|----|----|--------|--------|--------|
| 1  | Zn | -0.033 | 0.137  | -0.001 |
| 2  | O  | -1.608 | -0.914 | -0.680 |
| 3  | O  | 1.358  | -1.202 | -0.508 |
| 4  | N  | -1.140 | 1.860  | -0.162 |
| 5  | N  | 1.467  | 1.540  | 0.359  |
| 6  | C  | -2.432 | 1.926  | -0.364 |
| 7  | C  | 2.750  | 1.325  | 0.287  |
| 8  | C  | -0.362 | 3.090  | -0.072 |
| 9  | C  | 0.896  | 2.815  | 0.810  |
| 10 | C  | -3.308 | 0.826  | -0.603 |
| 11 | C  | 3.379  | 0.108  | -0.135 |
| 12 | C  | -4.698 | 1.105  | -0.734 |
| 13 | C  | 4.801  | 0.091  | -0.174 |
| 14 | C  | -5.629 | 0.131  | -1.014 |
| 15 | C  | 5.524  | -1.010 | -0.577 |
| 16 | C  | -5.180 | -1.207 | -1.192 |
| 17 | C  | 4.817  | -2.176 | -0.974 |
| 18 | C  | -3.834 | -1.532 | -1.081 |
| 19 | C  | 3.427  | -2.211 | -0.948 |
| 20 | C  | -2.841 | -0.546 | -0.774 |
| 21 | C  | 2.652  | -1.087 | -0.527 |

|    |   |        |        |        |
|----|---|--------|--------|--------|
| 22 | O | -6.172 | -2.103 | -1.476 |
| 23 | O | 5.610  | -3.218 | -1.365 |
| 24 | C | -5.791 | -3.462 | -1.693 |
| 25 | C | 4.963  | -4.420 | -1.784 |
| 26 | H | -5.317 | -3.896 | -0.795 |
| 27 | H | 4.356  | -4.855 | -0.972 |
| 28 | H | -6.721 | -4.000 | -1.913 |
| 29 | H | 5.769  | -5.114 | -2.051 |
| 30 | H | -5.099 | -3.554 | -2.548 |
| 31 | H | 4.319  | -4.246 | -2.664 |
| 32 | H | -0.954 | 3.889  | 0.420  |
| 33 | H | 0.525  | 2.639  | 1.840  |
| 34 | C | 0.048  | 3.576  | -1.476 |
| 35 | C | 1.815  | 4.049  | 0.833  |
| 36 | C | 0.942  | 4.821  | -1.413 |
| 37 | C | 2.196  | 4.556  | -0.567 |
| 38 | H | -0.865 | 3.773  | -2.062 |
| 39 | H | 1.268  | 4.847  | 1.367  |
| 40 | H | 0.580  | 2.754  | -1.986 |
| 41 | H | 2.713  | 3.850  | 1.443  |
| 42 | H | 0.374  | 5.661  | -0.972 |
| 43 | H | 2.801  | 5.473  | -0.476 |
| 44 | H | 1.225  | 5.134  | -2.431 |
| 45 | H | 2.829  | 3.813  | -1.082 |
| 46 | H | -2.911 | 2.926  | -0.362 |
| 47 | H | 3.455  | 2.131  | 0.560  |
| 48 | H | -5.028 | 2.142  | -0.609 |
| 49 | H | 5.333  | 0.999  | 0.128  |
| 50 | H | -6.693 | 0.348  | -1.115 |
| 51 | H | 6.614  | -1.017 | -0.608 |
| 52 | H | -3.464 | -2.548 | -1.216 |
| 53 | H | 2.860  | -3.091 | -1.253 |
| 54 | N | -0.382 | -0.601 | 1.981  |
| 55 | C | -1.235 | -0.037 | 2.857  |
| 56 | C | 0.197  | -1.773 | 2.310  |
| 57 | C | -1.530 | -0.606 | 4.097  |
| 58 | C | -0.042 | -2.410 | 3.528  |
| 59 | C | -0.918 | -1.815 | 4.441  |
| 60 | H | -1.699 | 0.899  | 2.534  |
| 61 | H | 0.854  | -2.190 | 1.542  |
| 62 | H | -2.229 | -0.111 | 4.773  |
| 63 | H | 0.451  | -3.358 | 3.752  |
| 64 | H | -1.126 | -2.288 | 5.403  |

### Structural parameters

|         |       |
|---------|-------|
| R(1-3)  | 1.997 |
| R(1-4)  | 2.054 |
| R(1-2)  | 2.012 |
| R(2-20) | 1.290 |
| R(3-21) | 1.299 |
| R(4-8)  | 1.459 |
| R(4-6)  | 1.310 |
| R(5-7)  | 1.303 |
| R(5-9)  | 1.468 |
| R(6-10) | 1.426 |
| R(6-46) | 1.109 |
| R(7-11) | 1.433 |

|          |        |
|----------|--------|
| R(7-47)  | 1.105  |
| R(8-9)   | 1.560  |
| R(8-34)  | 1.542  |
| R(8-32)  | 1.110  |
| R(9-35)  | 1.539  |
| R(9-33)  | 1.109  |
| R(10-12) | 1.424  |
| R(10-20) | 1.459  |
| R(11-21) | 1.452  |
| R(11-13) | 1.423  |
| R(12-14) | 1.376  |
| R(12-48) | 1.095  |
| R(13-15) | 1.378  |
| R(13-49) | 1.095  |
| R(14-16) | 1.423  |
| R(14-50) | 1.090  |
| R(15-17) | 1.420  |
| R(15-51) | 1.090  |
| R(16-18) | 1.389  |
| R(16-22) | 1.367  |
| R(17-19) | 1.391  |
| R(17-23) | 1.367  |
| R(18-20) | 1.432  |
| R(18-52) | 1.090  |
| R(19-21) | 1.429  |
| R(19-53) | 1.090  |
| R(22-24) | 1.427  |
| R(23-25) | 1.427  |
| R(24-28) | 1.097  |
| R(24-26) | 1.104  |
| R(24-30) | 1.104  |
| R(25-29) | 1.097  |
| R(25-31) | 1.104  |
| R(25-27) | 1.104  |
| R(34-36) | 1.534  |
| R(34-38) | 1.103  |
| R(34-40) | 1.104  |
| R(35-37) | 1.537  |
| R(35-39) | 1.105  |
| R(35-41) | 1.103  |
| R(36-37) | 1.535  |
| R(36-42) | 1.106  |
| R(36-44) | 1.102  |
| R(37-43) | 1.102  |
| R(37-45) | 1.103  |
| R(54-56) | 1.348  |
| R(54-55) | 1.346  |
| R(55-57) | 1.396  |
| R(55-60) | 1.094  |
| R(56-58) | 1.396  |
| R(56-61) | 1.093  |
| R(57-59) | 1.398  |
| R(57-62) | 1.091  |
| R(58-59) | 1.398  |
| R(58-63) | 1.091  |
| R(59-64) | 1.092  |
| A(3-1-4) | 156.67 |
| A(3-1-2) | 96.28  |

|             |        |
|-------------|--------|
| A(1-3-21)   | 129.64 |
| A(4-1-2)    | 89.41  |
| A(1-4-8)    | 114.51 |
| A(1-4-6)    | 125.91 |
| A(1-2-20)   | 128.59 |
| A(2-20-10)  | 124.43 |
| A(2-20-18)  | 118.79 |
| A(3-21-11)  | 124.56 |
| A(3-21-19)  | 118.30 |
| A(8-4-6)    | 119.55 |
| A(4-8-9)    | 108.46 |
| A(4-8-34)   | 110.55 |
| A(4-8-32)   | 110.49 |
| A(4-6-10)   | 126.32 |
| A(4-6-46)   | 118.17 |
| A(7-5-9)    | 122.90 |
| A(5-7-11)   | 126.03 |
| A(5-7-47)   | 119.60 |
| A(5-9-8)    | 107.02 |
| A(5-9-35)   | 117.95 |
| A(5-9-33)   | 106.09 |
| A(10-6-46)  | 115.51 |
| A(6-10-12)  | 117.58 |
| A(6-10-20)  | 123.29 |
| A(11-7-47)  | 114.37 |
| A(7-11-21)  | 123.98 |
| A(7-11-13)  | 117.16 |
| A(9-8-34)   | 110.87 |
| A(9-8-32)   | 107.87 |
| A(8-9-35)   | 110.43 |
| A(8-9-33)   | 106.47 |
| A(34-8-32)  | 108.57 |
| A(8-34-36)  | 111.92 |
| A(8-34-38)  | 108.71 |
| A(8-34-40)  | 108.30 |
| A(35-9-33)  | 108.24 |
| A(9-35-37)  | 113.48 |
| A(9-35-39)  | 106.92 |
| A(9-35-41)  | 110.49 |
| A(12-10-20) | 119.08 |
| A(10-12-14) | 122.69 |
| A(10-12-48) | 117.99 |
| A(10-20-18) | 116.78 |
| A(21-11-13) | 118.86 |
| A(11-21-19) | 117.14 |
| A(11-13-15) | 122.84 |
| A(11-13-49) | 117.93 |
| A(14-12-48) | 119.32 |
| A(12-14-16) | 118.54 |
| A(12-14-50) | 122.56 |
| A(15-13-49) | 119.23 |
| A(13-15-17) | 118.47 |
| A(13-15-51) | 122.53 |
| A(16-14-50) | 118.90 |
| A(14-16-18) | 121.04 |
| A(14-16-22) | 114.42 |
| A(17-15-51) | 118.99 |
| A(15-17-19) | 120.86 |

|             |        |
|-------------|--------|
| A(15-17-23) | 114.65 |
| A(18-16-22) | 124.54 |
| A(16-18-20) | 121.87 |
| A(16-18-52) | 122.47 |
| A(16-22-24) | 117.48 |
| A(19-17-23) | 124.49 |
| A(17-19-21) | 121.83 |
| A(17-19-53) | 122.36 |
| A(17-23-25) | 117.53 |
| A(20-18-52) | 115.65 |
| A(21-19-53) | 115.81 |
| A(22-24-28) | 105.71 |
| A(22-24-26) | 111.46 |
| A(22-24-30) | 111.40 |
| A(23-25-29) | 105.70 |
| A(23-25-31) | 111.49 |
| A(23-25-27) | 111.45 |
| A(28-24-26) | 109.54 |
| A(28-24-30) | 109.57 |
| A(26-24-30) | 109.10 |
| A(29-25-31) | 109.52 |
| A(29-25-27) | 109.50 |
| A(31-25-27) | 109.12 |
| A(36-34-38) | 111.07 |
| A(36-34-40) | 110.03 |
| A(34-36-37) | 111.01 |
| A(34-36-42) | 109.48 |
| A(34-36-44) | 110.01 |
| A(38-34-40) | 106.64 |
| A(37-35-39) | 108.90 |
| A(37-35-41) | 111.19 |
| A(35-37-36) | 110.90 |
| A(35-37-43) | 109.59 |
| A(35-37-45) | 110.19 |
| A(39-35-41) | 105.43 |
| A(37-36-42) | 109.33 |
| A(37-36-44) | 110.41 |
| A(36-37-43) | 110.48 |
| A(36-37-45) | 109.11 |
| A(42-36-44) | 106.49 |
| A(43-37-45) | 106.47 |
| A(56-54-55) | 118.54 |
| A(54-56-58) | 122.42 |
| A(54-56-61) | 114.76 |
| A(54-55-57) | 122.74 |
| A(54-55-60) | 115.77 |
| A(57-55-60) | 121.49 |
| A(55-57-59) | 118.61 |
| A(55-57-62) | 120.03 |
| A(58-56-61) | 122.81 |
| A(56-58-59) | 118.89 |
| A(56-58-63) | 119.85 |
| A(59-57-62) | 121.36 |
| A(57-59-58) | 118.79 |
| A(57-59-64) | 120.56 |
| A(59-58-63) | 121.27 |
| A(58-59-64) | 120.65 |

## Adduct 3-py

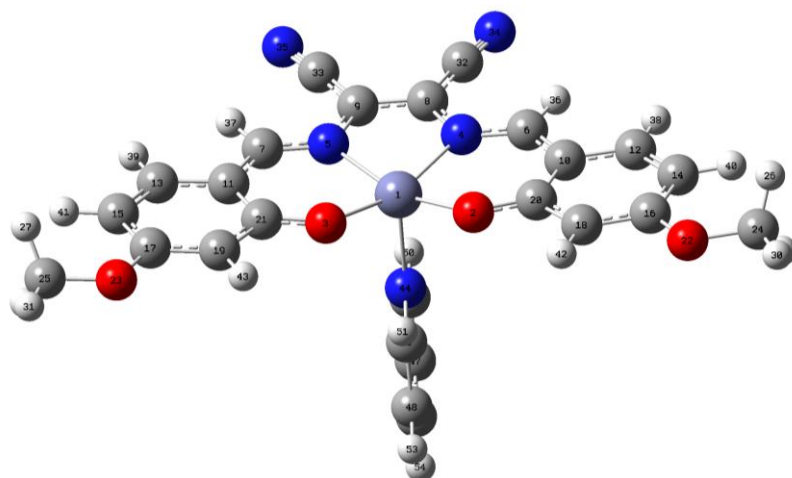

## Cartesian coordinates

|    |    | X      | Y      | Z      |
|----|----|--------|--------|--------|
| 1  | Zn | 0.003  | 0.100  | -0.231 |
| 2  | O  | -1.475 | -1.170 | -0.602 |
| 3  | O  | 1.487  | -1.170 | -0.585 |
| 4  | N  | -1.334 | 1.695  | -0.438 |
| 5  | N  | 1.338  | 1.696  | -0.432 |
| 6  | C  | -2.655 | 1.582  | -0.521 |
| 7  | C  | 2.660  | 1.586  | -0.509 |
| 8  | C  | -0.700 | 2.922  | -0.424 |
| 9  | C  | 0.702  | 2.922  | -0.420 |
| 10 | C  | -3.370 | 0.365  | -0.606 |
| 11 | C  | 3.377  | 0.370  | -0.593 |
| 12 | C  | -4.791 | 0.461  | -0.677 |
| 13 | C  | 4.798  | 0.470  | -0.662 |
| 14 | C  | -5.610 | -0.641 | -0.789 |
| 15 | C  | 5.621  | -0.629 | -0.773 |
| 16 | C  | -5.006 | -1.933 | -0.840 |
| 17 | C  | 5.021  | -1.923 | -0.824 |
| 18 | C  | -3.625 | -2.077 | -0.775 |
| 19 | C  | 3.640  | -2.071 | -0.759 |
| 20 | C  | -2.749 | -0.965 | -0.652 |
| 21 | C  | 2.761  | -0.961 | -0.637 |
| 22 | O  | -5.720 | -3.088 | -0.956 |
| 23 | O  | 5.738  | -3.076 | -0.939 |
| 24 | C  | -7.145 | -3.004 | -1.050 |
| 25 | C  | 7.162  | -2.988 | -1.035 |
| 26 | H  | -7.459 | -2.432 | -1.940 |
| 27 | H  | 7.473  | -2.415 | -1.926 |
| 28 | H  | -7.587 | -2.553 | -0.146 |
| 29 | H  | 7.604  | -2.535 | -0.132 |
| 30 | H  | -7.492 | -4.040 | -1.144 |
| 31 | H  | 7.512  | -4.022 | -1.130 |
| 32 | C  | -1.443 | 4.137  | -0.427 |
| 33 | C  | 1.444  | 4.138  | -0.420 |
| 34 | N  | -2.130 | 5.085  | -0.423 |
| 35 | N  | 2.129  | 5.087  | -0.414 |



|    |   |        |        |        |
|----|---|--------|--------|--------|
| 36 | H | -3.259 | 2.505  | -0.540 |
| 37 | H | 3.261  | 2.510  | -0.525 |
| 38 | H | -5.239 | 1.458  | -0.643 |
| 39 | H | 5.243  | 1.469  | -0.628 |
| 40 | H | -6.691 | -0.517 | -0.840 |
| 41 | H | 6.701  | -0.502 | -0.824 |
| 42 | H | -3.186 | -3.074 | -0.824 |
| 43 | H | 3.204  | -3.069 | -0.808 |
| 44 | N | -0.007 | -0.213 | 1.868  |
| 45 | C | -0.074 | 0.742  | 2.814  |
| 46 | C | 0.045  | -1.505 | 2.256  |
| 47 | C | -0.092 | 0.452  | 4.179  |
| 48 | C | 0.031  | -1.882 | 3.599  |
| 49 | C | -0.039 | -0.887 | 4.578  |
| 50 | H | -0.114 | 1.773  | 2.454  |
| 51 | H | 0.100  | -2.235 | 1.446  |
| 52 | H | -0.147 | 1.261  | 4.908  |
| 53 | H | 0.074  | -2.938 | 3.867  |
| 54 | H | -0.052 | -1.150 | 5.638  |

### Structural parameters

|          |       |
|----------|-------|
| R(1-2)   | 1.983 |
| R(1-3)   | 1.985 |
| R(2-20)  | 1.292 |
| R(3-21)  | 1.292 |
| R(4-6)   | 1.329 |
| R(4-8)   | 1.381 |
| R(5-7)   | 1.328 |
| R(5-9)   | 1.381 |
| R(6-10)  | 1.414 |
| R(6-36)  | 1.103 |
| R(7-11)  | 1.414 |
| R(7-37)  | 1.103 |
| R(8-9)   | 1.402 |
| R(8-32)  | 1.424 |
| R(9-33)  | 1.424 |
| R(10-12) | 1.426 |
| R(10-20) | 1.468 |
| R(11-13) | 1.426 |
| R(11-21) | 1.468 |
| R(12-14) | 1.377 |
| R(12-38) | 1.094 |
| R(13-15) | 1.377 |
| R(13-39) | 1.094 |
| R(14-16) | 1.427 |
| R(14-40) | 1.089 |
| R(15-17) | 1.426 |
| R(15-41) | 1.089 |
| R(16-18) | 1.390 |
| R(16-22) | 1.363 |
| R(17-19) | 1.390 |
| R(17-23) | 1.363 |
| R(18-20) | 1.421 |
| R(18-42) | 1.091 |
| R(19-21) | 1.421 |
| R(19-43) | 1.091 |
| R(22-24) | 1.430 |

|             |        |
|-------------|--------|
| R(23-25)    | 1.430  |
| R(24-26)    | 1.103  |
| R(24-30)    | 1.097  |
| R(24-28)    | 1.103  |
| R(25-31)    | 1.097  |
| R(25-27)    | 1.103  |
| R(25-29)    | 1.103  |
| R(32-34)    | 1.171  |
| R(33-35)    | 1.171  |
| R(44-46)    | 1.349  |
| R(44-45)    | 1.347  |
| R(45-47)    | 1.395  |
| R(45-50)    | 1.093  |
| R(46-48)    | 1.395  |
| R(46-51)    | 1.092  |
| R(47-49)    | 1.398  |
| R(47-52)    | 1.091  |
| R(48-49)    | 1.398  |
| R(48-53)    | 1.091  |
| R(49-54)    | 1.092  |
| A(2-1-3)    | 96.52  |
| A(1-2-20)   | 129.80 |
| A(1-3-21)   | 129.83 |
| A(2-20-10)  | 124.05 |
| A(2-20-18)  | 119.16 |
| A(3-21-11)  | 124.05 |
| A(3-21-19)  | 119.17 |
| A(6-4-8)    | 122.20 |
| A(4-6-10)   | 125.40 |
| A(4-6-36)   | 118.31 |
| A(4-8-9)    | 117.37 |
| A(4-8-32)   | 121.19 |
| A(7-5-9)    | 122.15 |
| A(5-7-11)   | 125.43 |
| A(5-7-37)   | 118.30 |
| A(5-9-8)    | 117.39 |
| A(5-9-33)   | 121.20 |
| A(10-6-36)  | 116.29 |
| A(6-10-12)  | 116.65 |
| A(6-10-20)  | 124.60 |
| A(11-7-37)  | 116.27 |
| A(7-11-13)  | 116.64 |
| A(7-11-21)  | 124.62 |
| A(9-8-32)   | 121.43 |
| A(8-9-33)   | 121.41 |
| A(8-32-34)  | 175.52 |
| A(9-33-35)  | 175.56 |
| A(12-10-20) | 118.73 |
| A(10-12-14) | 122.87 |
| A(10-12-38) | 117.88 |
| A(10-20-18) | 116.78 |
| A(13-11-21) | 118.73 |
| A(11-13-15) | 122.88 |
| A(11-13-39) | 117.87 |
| A(11-21-19) | 116.78 |
| A(14-12-38) | 119.25 |
| A(12-14-16) | 118.40 |
| A(12-14-40) | 120.18 |

|             |        |
|-------------|--------|
| A(15-13-39) | 119.25 |
| A(13-15-17) | 118.39 |
| A(13-15-41) | 120.18 |
| A(16-14-40) | 121.42 |
| A(14-16-18) | 120.83 |
| A(14-16-22) | 123.29 |
| A(17-15-41) | 121.43 |
| A(15-17-19) | 120.83 |
| A(15-17-23) | 123.30 |
| A(18-16-22) | 115.88 |
| A(16-18-20) | 122.39 |
| A(16-18-42) | 119.54 |
| A(16-22-24) | 118.53 |
| A(19-17-23) | 115.88 |
| A(17-19-21) | 122.39 |
| A(17-19-43) | 119.51 |
| A(17-23-25) | 118.51 |
| A(20-18-42) | 118.08 |
| A(21-19-43) | 118.09 |
| A(22-24-26) | 111.56 |
| A(22-24-30) | 105.41 |
| A(22-24-28) | 111.65 |
| A(23-25-31) | 105.41 |
| A(23-25-27) | 111.56 |
| A(23-25-29) | 111.65 |
| A(26-24-30) | 109.26 |
| A(26-24-28) | 109.60 |
| A(30-24-28) | 109.24 |
| A(31-25-27) | 109.26 |
| A(31-25-29) | 109.24 |
| A(27-25-29) | 109.60 |
| A(46-44-45) | 118.59 |
| A(44-46-48) | 122.36 |
| A(44-46-51) | 115.34 |
| A(44-45-47) | 122.71 |
| A(44-45-50) | 116.07 |
| A(47-45-50) | 121.23 |
| A(45-47-49) | 118.59 |
| A(45-47-52) | 119.99 |
| A(48-46-51) | 122.30 |
| A(46-48-49) | 118.87 |
| A(46-48-53) | 119.83 |
| A(49-47-52) | 121.42 |
| A(47-49-48) | 118.88 |
| A(47-49-54) | 120.53 |
| A(49-48-53) | 121.30 |
| A(48-49-54) | 120.59 |

## Adduct 4-py

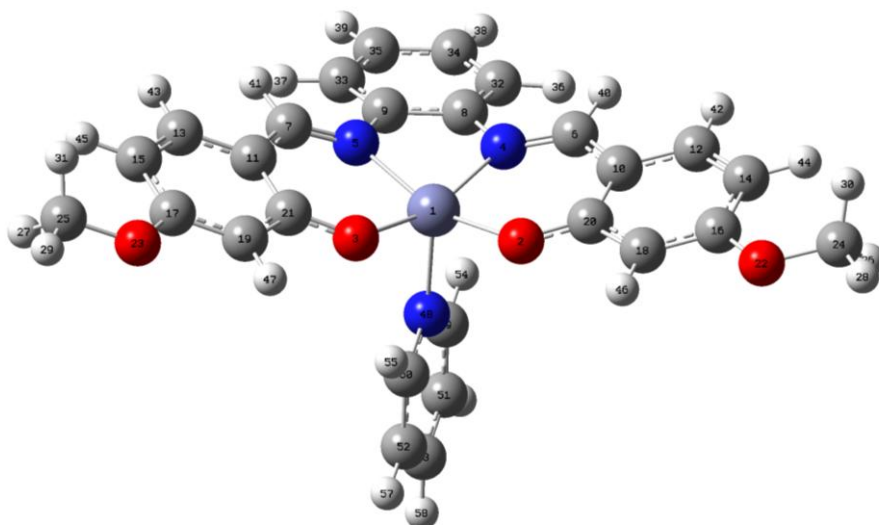

## Cartesian coordinates

|    |    | X      | Y      | Z      |
|----|----|--------|--------|--------|
| 1  | Zn | 0.010  | 0.055  | 0.020  |
| 2  | O  | -1.445 | -1.296 | 0.033  |
| 3  | O  | 1.517  | -1.253 | 0.099  |
| 4  | N  | -1.324 | 1.488  | -0.693 |
| 5  | N  | 1.325  | 1.517  | -0.662 |
| 6  | C  | -2.563 | 1.245  | -1.070 |
| 7  | C  | 2.575  | 1.309  | -1.015 |
| 8  | C  | -0.729 | 2.748  | -0.841 |
| 9  | C  | 0.704  | 2.764  | -0.819 |
| 10 | C  | -3.262 | 0.017  | -0.916 |
| 11 | C  | 3.305  | 0.097  | -0.855 |
| 12 | C  | -4.617 | -0.014 | -1.348 |
| 13 | C  | 4.660  | 0.099  | -1.282 |
| 14 | C  | -5.414 | -1.136 | -1.246 |
| 15 | C  | 5.485  | -1.004 | -1.178 |
| 16 | C  | -4.845 | -2.316 | -0.690 |
| 17 | C  | 4.942  | -2.197 | -0.625 |
| 18 | C  | -3.520 | -2.340 | -0.270 |
| 19 | C  | 3.617  | -2.251 | -0.207 |
| 20 | C  | -2.671 | -1.201 | -0.358 |
| 21 | C  | 2.744  | -1.133 | -0.297 |
| 22 | O  | -5.538 | -3.485 | -0.537 |
| 23 | O  | 5.661  | -3.350 | -0.473 |
| 24 | C  | -6.899 | -3.524 | -0.964 |
| 25 | C  | 7.023  | -3.359 | -0.900 |
| 26 | H  | -7.524 | -2.804 | -0.408 |
| 27 | H  | 7.631  | -2.627 | -0.340 |
| 28 | H  | -7.245 | -4.543 | -0.749 |
| 29 | H  | 7.390  | -4.371 | -0.688 |
| 30 | H  | -6.993 | -3.330 | -2.047 |
| 31 | H  | 7.112  | -3.159 | -1.982 |
| 32 | C  | -1.425 | 3.967  | -0.946 |
| 33 | C  | 1.375  | 3.998  | -0.901 |
| 34 | C  | -0.737 | 5.177  | -1.051 |

|    |   |        |        |        |
|----|---|--------|--------|--------|
| 35 | C | 0.665  | 5.192  | -1.027 |
| 36 | H | -2.517 | 3.967  | -0.921 |
| 37 | H | 2.465  | 4.023  | -0.836 |
| 38 | H | -1.296 | 6.112  | -1.126 |
| 39 | H | 1.204  | 6.141  | -1.083 |
| 40 | H | -3.130 | 2.048  | -1.574 |
| 41 | H | 3.131  | 2.128  | -1.504 |
| 42 | H | -5.039 | 0.903  | -1.774 |
| 43 | H | 5.062  | 1.026  | -1.705 |
| 44 | H | -6.448 | -1.107 | -1.585 |
| 45 | H | 6.519  | -0.950 | -1.514 |
| 46 | H | -3.101 | -3.260 | 0.140  |
| 47 | H | 3.220  | -3.183 | 0.198  |
| 48 | N | -0.041 | 0.368  | 2.122  |
| 49 | C | -0.517 | 1.471  | 2.730  |
| 50 | C | 0.362  | -0.668 | 2.886  |
| 51 | C | -0.603 | 1.589  | 4.118  |
| 52 | C | 0.307  | -0.633 | 4.280  |
| 53 | C | -0.183 | 0.515  | 4.909  |
| 54 | H | -0.841 | 2.280  | 2.070  |
| 55 | H | 0.745  | -1.529 | 2.333  |
| 56 | H | -0.992 | 2.505  | 4.564  |
| 57 | H | 0.643  | -1.496 | 4.858  |
| 58 | H | -0.238 | 0.573  | 5.998  |

### Structural parameters

|          |       |
|----------|-------|
| R(1-2)   | 1.985 |
| R(1-3)   | 1.997 |
| R(2-20)  | 1.291 |
| R(3-21)  | 1.295 |
| R(4-6)   | 1.318 |
| R(4-8)   | 1.401 |
| R(5-9)   | 1.401 |
| R(5-7)   | 1.316 |
| R(6-10)  | 1.422 |
| R(6-40)  | 1.104 |
| R(7-11)  | 1.423 |
| R(7-41)  | 1.104 |
| R(8-9)   | 1.433 |
| R(8-32)  | 1.408 |
| R(9-33)  | 1.407 |
| R(10-12) | 1.422 |
| R(10-20) | 1.465 |
| R(11-13) | 1.421 |
| R(11-21) | 1.462 |
| R(12-14) | 1.381 |
| R(12-42) | 1.095 |
| R(13-15) | 1.381 |
| R(13-43) | 1.095 |
| R(14-16) | 1.424 |
| R(14-44) | 1.089 |
| R(15-17) | 1.422 |
| R(15-45) | 1.089 |
| R(16-18) | 1.390 |
| R(16-22) | 1.367 |
| R(17-19) | 1.391 |
| R(17-23) | 1.367 |

|            |        |
|------------|--------|
| R(18-20)   | 1.423  |
| R(18-46)   | 1.091  |
| R(19-21)   | 1.421  |
| R(19-47)   | 1.091  |
| R(22-24)   | 1.427  |
| R(23-25)   | 1.427  |
| R(24-30)   | 1.104  |
| R(24-28)   | 1.097  |
| R(24-26)   | 1.104  |
| R(25-29)   | 1.097  |
| R(25-31)   | 1.104  |
| R(25-27)   | 1.104  |
| R(32-34)   | 1.396  |
| R(32-36)   | 1.092  |
| R(33-35)   | 1.396  |
| R(33-37)   | 1.092  |
| R(34-35)   | 1.402  |
| R(34-38)   | 1.092  |
| R(35-39)   | 1.092  |
| R(48-49)   | 1.347  |
| R(48-50)   | 1.349  |
| R(49-51)   | 1.395  |
| R(49-54)   | 1.093  |
| R(50-52)   | 1.396  |
| R(50-55)   | 1.093  |
| R(51-53)   | 1.398  |
| R(51-56)   | 1.091  |
| R(52-53)   | 1.398  |
| R(52-57)   | 1.091  |
| R(53-58)   | 1.092  |
| A(2-1-3)   | 96.15  |
| A(1-2-20)  | 130.11 |
| A(1-3-21)  | 129.99 |
| A(2-20-10) | 124.06 |
| A(2-20-18) | 119.30 |
| A(3-21-11) | 123.90 |
| A(3-21-19) | 119.35 |
| A(6-4-8)   | 122.35 |
| A(4-6-10)  | 126.20 |
| A(4-6-40)  | 118.62 |
| A(4-8-9)   | 115.67 |
| A(4-8-32)  | 125.18 |
| A(9-5-7)   | 122.11 |
| A(5-9-8)   | 115.75 |
| A(5-9-33)  | 125.14 |
| A(5-7-11)  | 126.28 |
| A(5-7-41)  | 118.62 |
| A(10-6-40) | 115.17 |
| A(6-10-12) | 116.99 |
| A(6-10-20) | 124.15 |
| A(11-7-41) | 115.08 |
| A(7-11-13) | 116.96 |
| A(7-11-21) | 124.22 |
| A(9-8-32)  | 119.08 |
| A(8-9-33)  | 119.06 |
| A(8-32-34) | 120.83 |
| A(8-32-36) | 119.55 |
| A(9-33-35) | 120.86 |

|             |        |
|-------------|--------|
| A(9-33-37)  | 119.54 |
| A(12-10-20) | 118.85 |
| A(10-12-14) | 123.02 |
| A(10-12-42) | 117.91 |
| A(10-20-18) | 116.63 |
| A(13-11-21) | 118.82 |
| A(11-13-15) | 123.04 |
| A(11-13-43) | 117.91 |
| A(11-21-19) | 116.75 |
| A(14-12-42) | 119.07 |
| A(12-14-16) | 118.17 |
| A(12-14-44) | 120.27 |
| A(15-13-43) | 119.05 |
| A(13-15-17) | 118.14 |
| A(13-15-45) | 120.28 |
| A(16-14-44) | 121.56 |
| A(14-16-18) | 120.87 |
| A(14-16-22) | 123.33 |
| A(17-15-45) | 121.58 |
| A(15-17-19) | 120.83 |
| A(15-17-23) | 123.41 |
| A(18-16-22) | 115.80 |
| A(16-18-20) | 122.44 |
| A(16-18-46) | 119.59 |
| A(16-22-24) | 118.28 |
| A(19-17-23) | 115.76 |
| A(17-19-21) | 122.41 |
| A(17-19-47) | 119.43 |
| A(17-23-25) | 118.24 |
| A(20-18-46) | 117.97 |
| A(21-19-47) | 118.16 |
| A(22-24-30) | 111.71 |
| A(22-24-28) | 105.52 |
| A(22-24-26) | 111.73 |
| A(23-25-29) | 105.52 |
| A(23-25-31) | 111.69 |
| A(23-25-27) | 111.72 |
| A(30-24-28) | 109.18 |
| A(30-24-26) | 109.38 |
| A(28-24-26) | 109.19 |
| A(29-25-31) | 109.20 |
| A(29-25-27) | 109.21 |
| A(31-25-27) | 109.39 |
| A(34-32-36) | 119.60 |
| A(32-34-35) | 120.08 |
| A(32-34-38) | 119.72 |
| A(35-33-37) | 119.58 |
| A(33-35-34) | 120.08 |
| A(33-35-39) | 119.73 |
| A(35-34-38) | 120.18 |
| A(34-35-39) | 120.18 |
| A(49-48-50) | 118.58 |
| A(48-49-51) | 122.69 |
| A(48-49-54) | 115.96 |
| A(48-50-52) | 122.37 |
| A(48-50-55) | 115.00 |
| A(51-49-54) | 121.35 |
| A(49-51-53) | 118.65 |

|             |        |
|-------------|--------|
| A(49-51-56) | 119.96 |
| A(52-50-55) | 122.63 |
| A(50-52-53) | 118.90 |
| A(50-52-57) | 119.80 |
| A(53-51-56) | 121.39 |
| A(51-53-52) | 118.81 |
| A(51-53-58) | 120.57 |
| A(53-52-57) | 121.29 |
| A(52-53-58) | 120.63 |

### Adduct 5-py

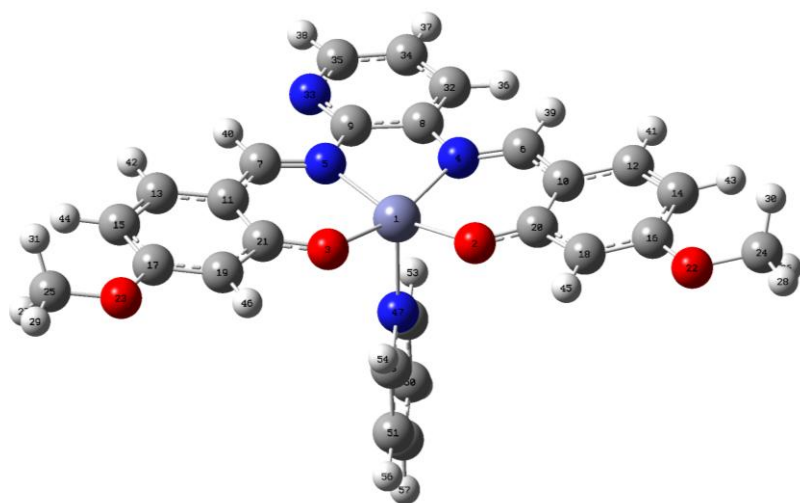

### Cartesian coordinates

|    |    | X      | Y      | Z      |
|----|----|--------|--------|--------|
| 1  | Zn | -0.015 | 0.064  | -0.158 |
| 2  | O  | -1.488 | -1.254 | -0.373 |
| 3  | O  | 1.446  | -1.255 | -0.422 |
| 4  | N  | -1.358 | 1.629  | -0.456 |
| 5  | N  | 1.305  | 1.599  | -0.517 |
| 6  | C  | -2.649 | 1.486  | -0.688 |
| 7  | C  | 2.611  | 1.480  | -0.680 |
| 8  | C  | -0.729 | 2.879  | -0.478 |
| 9  | C  | 0.706  | 2.863  | -0.524 |
| 10 | C  | -3.367 | 0.261  | -0.707 |
| 11 | C  | 3.335  | 0.261  | -0.706 |
| 12 | C  | -4.770 | 0.341  | -0.927 |
| 13 | C  | 4.744  | 0.357  | -0.884 |
| 14 | C  | -5.589 | -0.769 | -0.979 |
| 15 | C  | 5.572  | -0.745 | -0.941 |
| 16 | C  | -4.993 | -2.052 | -0.815 |
| 17 | C  | 4.983  | -2.036 | -0.819 |
| 18 | C  | -3.625 | -2.182 | -0.612 |
| 19 | C  | 3.611  | -2.181 | -0.647 |
| 20 | C  | -2.752 | -1.060 | -0.546 |
| 21 | C  | 2.730  | -1.068 | -0.577 |



|    |   |        |        |        |
|----|---|--------|--------|--------|
| 22 | O | -5.705 | -3.219 | -0.850 |
| 23 | O | 5.704  | -3.197 | -0.864 |
| 24 | C | -7.112 | -3.146 | -1.077 |
| 25 | C | 7.116  | -3.109 | -1.058 |
| 26 | H | -7.627 | -2.585 | -0.278 |
| 27 | H | 7.608  | -2.563 | -0.235 |
| 28 | H | -7.464 | -4.185 | -1.072 |
| 29 | H | 7.475  | -4.145 | -1.069 |
| 30 | H | -7.344 | -2.690 | -2.055 |
| 31 | H | 7.365  | -2.628 | -2.020 |
| 32 | C | -1.352 | 4.137  | -0.436 |
| 33 | N | 1.450  | 3.979  | -0.559 |
| 34 | C | -0.571 | 5.294  | -0.471 |
| 35 | C | 0.821  | 5.162  | -0.541 |
| 36 | H | -2.440 | 4.214  | -0.364 |
| 37 | H | -1.032 | 6.283  | -0.436 |
| 38 | H | 1.464  | 6.048  | -0.572 |
| 39 | H | -3.255 | 2.382  | -0.914 |
| 40 | H | 3.185  | 2.411  | -0.813 |
| 41 | H | -5.213 | 1.334  | -1.056 |
| 42 | H | 5.178  | 1.357  | -0.980 |
| 43 | H | -6.659 | -0.654 | -1.145 |
| 44 | H | 6.645  | -0.619 | -1.077 |
| 45 | H | -3.189 | -3.176 | -0.502 |
| 46 | H | 3.184  | -3.182 | -0.567 |
| 47 | N | 0.018  | -0.117 | 1.971  |
| 48 | C | -0.220 | 0.879  | 2.844  |
| 49 | C | 0.249  | -1.356 | 2.453  |
| 50 | C | -0.233 | 0.685  | 4.226  |
| 51 | C | 0.252  | -1.638 | 3.820  |
| 52 | C | 0.008  | -0.600 | 4.723  |
| 53 | H | -0.406 | 1.864  | 2.408  |
| 54 | H | 0.442  | -2.120 | 1.696  |
| 55 | H | -0.427 | 1.526  | 4.894  |
| 56 | H | 0.444  | -2.655 | 4.164  |
| 57 | H | 0.005  | -0.788 | 5.799  |

### Structural parameters

|          |       |
|----------|-------|
| R(1-3)   | 1.986 |
| R(1-2)   | 1.989 |
| R(1-4)   | 2.084 |
| R(1-5)   | 2.056 |
| R(2-20)  | 1.290 |
| R(3-21)  | 1.306 |
| R(4-6)   | 1.319 |
| R(4-8)   | 1.399 |
| R(5-9)   | 1.399 |
| R(5-7)   | 1.322 |
| R(6-10)  | 1.420 |
| R(6-39)  | 1.104 |
| R(7-11)  | 1.418 |
| R(7-40)  | 1.102 |
| R(8-9)   | 1.436 |
| R(8-32)  | 1.405 |
| R(9-33)  | 1.341 |
| R(10-12) | 1.423 |
| R(10-20) | 1.465 |

|            |        |
|------------|--------|
| R(11-13)   | 1.423  |
| R(11-21)   | 1.465  |
| R(12-14)   | 1.380  |
| R(12-41)   | 1.095  |
| R(13-15)   | 1.380  |
| R(13-42)   | 1.095  |
| R(14-16)   | 1.424  |
| R(14-43)   | 1.089  |
| R(15-17)   | 1.424  |
| R(15-44)   | 1.089  |
| R(16-18)   | 1.390  |
| R(16-22)   | 1.367  |
| R(17-19)   | 1.390  |
| R(17-23)   | 1.367  |
| R(18-20)   | 1.423  |
| R(18-45)   | 1.091  |
| R(19-21)   | 1.422  |
| R(19-46)   | 1.091  |
| R(22-24)   | 1.428  |
| R(23-25)   | 1.428  |
| R(24-30)   | 1.104  |
| R(24-28)   | 1.097  |
| R(24-26)   | 1.104  |
| R(25-29)   | 1.097  |
| R(25-31)   | 1.104  |
| R(25-27)   | 1.104  |
| R(32-34)   | 1.397  |
| R(32-36)   | 1.092  |
| R(33-35)   | 1.340  |
| R(34-35)   | 1.400  |
| R(34-37)   | 1.092  |
| R(35-38)   | 1.095  |
| R(47-48)   | 1.346  |
| R(47-49)   | 1.349  |
| R(48-50)   | 1.395  |
| R(48-53)   | 1.093  |
| R(49-51)   | 1.395  |
| R(49-54)   | 1.092  |
| R(50-52)   | 1.398  |
| R(50-55)   | 1.091  |
| R(51-52)   | 1.398  |
| R(51-56)   | 1.091  |
| R(52-57)   | 1.092  |
| A(3-1-2)   | 95.20  |
| A(3-1-4)   | 162.53 |
| A(3-1-5)   | 90.03  |
| A(1-3-21)  | 130.05 |
| A(2-1-4)   | 90.25  |
| A(2-1-5)   | 162.08 |
| A(1-2-20)  | 129.85 |
| A(4-1-5)   | 80.10  |
| A(1-4-6)   | 125.06 |
| A(1-4-8)   | 112.50 |
| A(1-5-9)   | 113.65 |
| A(1-5-7)   | 126.08 |
| A(2-20-10) | 124.12 |
| A(2-20-18) | 119.23 |
| A(3-21-11) | 123.10 |

|             |        |
|-------------|--------|
| A(3-21-19)  | 120.18 |
| A(6-4-8)    | 122.30 |
| A(4-6-10)   | 126.18 |
| A(4-6-39)   | 118.98 |
| A(4-8-9)    | 116.13 |
| A(4-8-32)   | 126.85 |
| A(9-5-7)    | 120.22 |
| A(5-9-8)    | 115.93 |
| A(5-9-33)   | 121.00 |
| A(5-7-11)   | 125.70 |
| A(5-7-40)   | 117.00 |
| A(10-6-39)  | 114.82 |
| A(6-10-12)  | 116.85 |
| A(6-10-20)  | 124.35 |
| A(11-7-40)  | 117.31 |
| A(7-11-13)  | 116.68 |
| A(7-11-21)  | 124.56 |
| A(9-8-32)   | 117.01 |
| A(8-9-33)   | 123.07 |
| A(8-32-34)  | 119.53 |
| A(8-32-36)  | 120.49 |
| A(9-33-35)  | 118.32 |
| A(12-10-20) | 118.78 |
| A(10-12-14) | 123.06 |
| A(10-12-41) | 117.90 |
| A(10-20-18) | 116.65 |
| A(13-11-21) | 118.76 |
| A(11-13-15) | 123.05 |
| A(11-13-42) | 117.72 |
| A(11-21-19) | 116.71 |
| A(14-12-41) | 119.04 |
| A(12-14-16) | 118.19 |
| A(12-14-43) | 120.27 |
| A(15-13-42) | 119.23 |
| A(13-15-17) | 118.19 |
| A(13-15-44) | 120.27 |
| A(16-14-43) | 121.54 |
| A(14-16-18) | 120.85 |
| A(14-16-22) | 123.28 |
| A(17-15-44) | 121.54 |
| A(15-17-19) | 120.88 |
| A(15-17-23) | 123.31 |
| A(18-16-22) | 115.87 |
| A(16-18-20) | 122.47 |
| A(16-18-45) | 119.57 |
| A(16-22-24) | 118.28 |
| A(19-17-23) | 115.82 |
| A(17-19-21) | 122.41 |
| A(17-19-46) | 119.45 |
| A(17-23-25) | 118.27 |
| A(20-18-45) | 117.96 |
| A(21-19-46) | 118.14 |
| A(22-24-30) | 111.66 |
| A(22-24-28) | 105.50 |
| A(22-24-26) | 111.72 |
| A(23-25-29) | 105.50 |
| A(23-25-31) | 111.65 |
| A(23-25-27) | 111.73 |

|             |        |
|-------------|--------|
| A(30-24-28) | 109.21 |
| A(30-24-26) | 109.43 |
| A(28-24-26) | 109.20 |
| A(29-25-31) | 109.23 |
| A(29-25-27) | 109.21 |
| A(31-25-27) | 109.42 |
| A(34-32-36) | 119.97 |
| A(32-34-35) | 118.69 |
| A(32-34-37) | 120.89 |
| A(33-35-34) | 123.35 |
| A(33-35-38) | 116.03 |
| A(35-34-37) | 120.42 |
| A(34-35-38) | 120.62 |
| A(48-47-49) | 118.59 |
| A(47-48-50) | 122.73 |
| A(47-48-53) | 115.97 |
| A(47-49-51) | 122.36 |
| A(47-49-54) | 115.15 |
| A(50-48-53) | 121.30 |
| A(48-50-52) | 118.60 |
| A(48-50-55) | 120.01 |
| A(51-49-54) | 122.49 |
| A(49-51-52) | 118.88 |
| A(49-51-56) | 119.83 |
| A(52-50-55) | 121.39 |
| A(50-52-51) | 118.83 |
| A(50-52-57) | 120.54 |
| A(52-51-56) | 121.28 |
| A(51-52-57) | 120.62 |

## Adduct 6-py

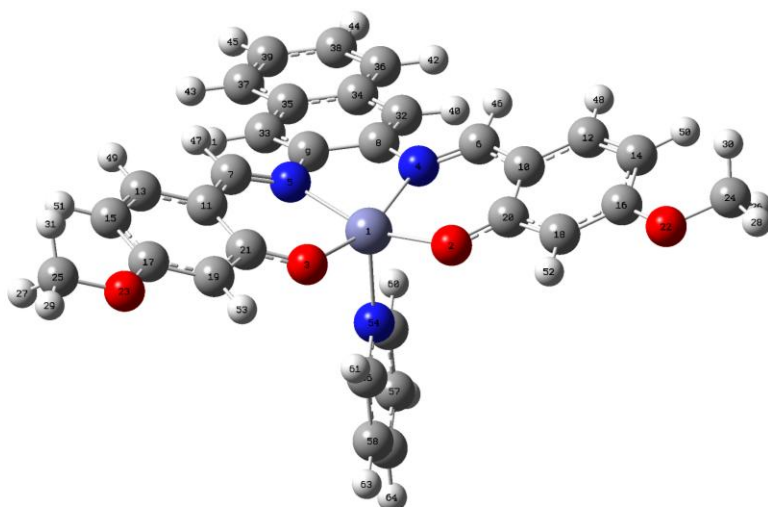

## Cartesian coordinates

|    |    | X      | Y      | Z      |
|----|----|--------|--------|--------|
| 1  | Zn | 0.030  | -0.582 | 0.118  |
| 2  | O  | -1.390 | -1.968 | 0.027  |
| 3  | O  | 1.575  | -1.848 | 0.091  |
| 4  | N  | -1.342 | 0.859  | -0.501 |
| 5  | N  | 1.298  | 0.958  | -0.472 |
| 6  | C  | -2.562 | 0.605  | -0.933 |
| 7  | C  | 2.539  | 0.803  | -0.884 |
| 8  | C  | -0.795 | 2.148  | -0.533 |
| 9  | C  | 0.655  | 2.202  | -0.513 |
| 10 | C  | -3.222 | -0.652 | -0.887 |
| 11 | C  | 3.299  | -0.398 | -0.832 |
| 12 | C  | -4.560 | -0.696 | -1.369 |
| 13 | C  | 4.636  | -0.336 | -1.309 |
| 14 | C  | -5.321 | -1.847 | -1.371 |
| 15 | C  | 5.487  | -1.424 | -1.306 |
| 16 | C  | -4.730 | -3.045 | -0.875 |
| 17 | C  | 4.992  | -2.662 | -0.809 |
| 18 | C  | -3.420 | -3.054 | -0.411 |
| 19 | C  | 3.686  | -2.774 | -0.345 |
| 20 | C  | -2.607 | -1.886 | -0.394 |
| 21 | C  | 2.785  | -1.674 | -0.335 |
| 22 | O  | -5.387 | -4.242 | -0.828 |
| 23 | O  | 5.741  | -3.804 | -0.758 |
| 24 | C  | -6.731 | -4.296 | -1.307 |
| 25 | C  | 7.084  | -3.753 | -1.239 |
| 26 | H  | -7.399 | -3.638 | -0.723 |
| 27 | H  | 7.700  | -3.046 | -0.657 |
| 28 | H  | -7.047 | -5.338 | -1.177 |
| 29 | H  | 7.481  | -4.767 | -1.111 |
| 30 | H  | -6.794 | -4.028 | -2.376 |
| 31 | H  | 7.124  | -3.480 | -2.308 |
| 32 | C  | -1.521 | 3.333  | -0.518 |
| 33 | C  | 1.290  | 3.437  | -0.477 |
| 34 | C  | -0.882 | 4.599  | -0.509 |
| 35 | C  | 0.558  | 4.653  | -0.487 |

|    |   |        |        |        |
|----|---|--------|--------|--------|
| 36 | C | -1.613 | 5.820  | -0.499 |
| 37 | C | 1.196  | 5.924  | -0.455 |
| 38 | C | -0.961 | 7.039  | -0.474 |
| 39 | C | 0.455  | 7.092  | -0.452 |
| 40 | H | -2.614 | 3.301  | -0.485 |
| 41 | H | 2.380  | 3.488  | -0.410 |
| 42 | H | -2.706 | 5.777  | -0.515 |
| 43 | H | 2.289  | 5.962  | -0.437 |
| 44 | H | -1.538 | 7.967  | -0.471 |
| 45 | H | 0.961  | 8.060  | -0.431 |
| 46 | H | -3.137 | 1.426  | -1.396 |
| 47 | H | 3.054  | 1.668  | -1.337 |
| 48 | H | -5.000 | 0.234  | -1.745 |
| 49 | H | 5.001  | 0.625  | -1.687 |
| 50 | H | -6.344 | -1.829 | -1.743 |
| 51 | H | 6.506  | -1.324 | -1.676 |
| 52 | H | -2.983 | -3.987 | -0.051 |
| 53 | H | 3.325  | -3.739 | 0.013  |
| 54 | N | -0.020 | -0.421 | 2.231  |
| 55 | C | -0.500 | 0.635  | 2.916  |
| 56 | C | 0.395  | -1.504 | 2.920  |
| 57 | C | -0.578 | 0.656  | 4.309  |
| 58 | C | 0.347  | -1.566 | 4.313  |
| 59 | C | -0.147 | -0.466 | 5.022  |
| 60 | H | -0.832 | 1.485  | 2.315  |
| 61 | H | 0.781  | -2.322 | 2.308  |
| 62 | H | -0.971 | 1.537  | 4.819  |
| 63 | H | 0.692  | -2.463 | 4.829  |
| 64 | H | -0.196 | -0.484 | 6.113  |

### Structural parameters

|          |       |
|----------|-------|
| R(1-2)   | 1.986 |
| R(1-3)   | 1.998 |
| R(2-20)  | 1.291 |
| R(3-21)  | 1.294 |
| R(4-6)   | 1.318 |
| R(4-8)   | 1.401 |
| R(5-9)   | 1.401 |
| R(5-7)   | 1.316 |
| R(6-10)  | 1.421 |
| R(6-46)  | 1.105 |
| R(7-11)  | 1.422 |
| R(7-47)  | 1.104 |
| R(8-9)   | 1.451 |
| R(8-32)  | 1.390 |
| R(9-33)  | 1.389 |
| R(10-20) | 1.465 |
| R(10-12) | 1.422 |
| R(11-13) | 1.421 |
| R(11-21) | 1.463 |
| R(12-14) | 1.380 |
| R(12-48) | 1.095 |
| R(13-15) | 1.381 |
| R(13-49) | 1.095 |
| R(14-16) | 1.424 |
| R(14-50) | 1.089 |
| R(15-17) | 1.423 |

|            |        |
|------------|--------|
| R(15-51)   | 1.089  |
| R(16-18)   | 1.390  |
| R(16-22)   | 1.367  |
| R(17-19)   | 1.391  |
| R(17-23)   | 1.367  |
| R(18-20)   | 1.423  |
| R(18-52)   | 1.091  |
| R(19-21)   | 1.421  |
| R(19-53)   | 1.091  |
| R(22-24)   | 1.428  |
| R(23-25)   | 1.428  |
| R(24-30)   | 1.104  |
| R(24-28)   | 1.097  |
| R(24-26)   | 1.104  |
| R(25-29)   | 1.097  |
| R(25-31)   | 1.104  |
| R(25-27)   | 1.104  |
| R(32-34)   | 1.419  |
| R(32-40)   | 1.093  |
| R(33-35)   | 1.419  |
| R(33-41)   | 1.093  |
| R(34-35)   | 1.441  |
| R(34-36)   | 1.422  |
| R(35-37)   | 1.423  |
| R(36-38)   | 1.383  |
| R(36-42)   | 1.094  |
| R(37-39)   | 1.383  |
| R(37-43)   | 1.094  |
| R(38-44)   | 1.093  |
| R(38-39)   | 1.418  |
| R(39-45)   | 1.092  |
| R(54-55)   | 1.347  |
| R(54-56)   | 1.349  |
| R(55-57)   | 1.395  |
| R(55-60)   | 1.093  |
| R(56-58)   | 1.395  |
| R(56-61)   | 1.093  |
| R(57-59)   | 1.398  |
| R(57-62)   | 1.091  |
| R(58-59)   | 1.398  |
| R(58-63)   | 1.091  |
| R(59-64)   | 1.092  |
| A(2-1-3)   | 96.32  |
| A(1-2-20)  | 130.13 |
| A(1-3-21)  | 129.98 |
| A(2-20-10) | 124.02 |
| A(2-20-18) | 119.35 |
| A(3-21-11) | 123.84 |
| A(3-21-19) | 119.41 |
| A(6-4-8)   | 122.10 |
| A(4-6-10)  | 126.18 |
| A(4-6-46)  | 118.44 |
| A(4-8-9)   | 115.10 |
| A(4-8-32)  | 125.45 |
| A(9-5-7)   | 121.88 |
| A(5-9-8)   | 115.20 |
| A(5-9-33)  | 125.39 |
| A(5-7-11)  | 126.27 |

|             |        |
|-------------|--------|
| A(5-7-47)   | 118.41 |
| A(10-6-46)  | 115.36 |
| A(6-10-20)  | 124.13 |
| A(6-10-12)  | 117.00 |
| A(11-7-47)  | 115.30 |
| A(7-11-13)  | 116.97 |
| A(7-11-21)  | 124.17 |
| A(9-8-32)   | 119.37 |
| A(8-9-33)   | 119.34 |
| A(8-32-34)  | 121.70 |
| A(8-32-40)  | 119.86 |
| A(9-33-35)  | 121.72 |
| A(9-33-41)  | 119.88 |
| A(20-10-12) | 118.87 |
| A(10-20-18) | 116.63 |
| A(10-12-14) | 122.99 |
| A(10-12-48) | 117.92 |
| A(13-11-21) | 118.86 |
| A(11-13-15) | 122.99 |
| A(11-13-49) | 117.91 |
| A(11-21-19) | 116.74 |
| A(14-12-48) | 119.09 |
| A(12-14-16) | 118.19 |
| A(12-14-50) | 120.27 |
| A(15-13-49) | 119.09 |
| A(13-15-17) | 118.17 |
| A(13-15-51) | 120.27 |
| A(16-14-50) | 121.54 |
| A(14-16-18) | 120.88 |
| A(14-16-22) | 123.29 |
| A(17-15-51) | 121.57 |
| A(15-17-19) | 120.86 |
| A(15-17-23) | 123.35 |
| A(18-16-22) | 115.82 |
| A(16-18-20) | 122.42 |
| A(16-18-52) | 119.59 |
| A(16-22-24) | 118.30 |
| A(19-17-23) | 115.79 |
| A(17-19-21) | 122.37 |
| A(17-19-53) | 119.43 |
| A(17-23-25) | 118.22 |
| A(20-18-52) | 117.98 |
| A(21-19-53) | 118.19 |
| A(22-24-30) | 111.69 |
| A(22-24-28) | 105.52 |
| A(22-24-26) | 111.72 |
| A(23-25-29) | 105.51 |
| A(23-25-31) | 111.67 |
| A(23-25-27) | 111.70 |
| A(30-24-28) | 109.20 |
| A(30-24-26) | 109.41 |
| A(28-24-26) | 109.20 |
| A(29-25-31) | 109.22 |
| A(29-25-27) | 109.22 |
| A(31-25-27) | 109.41 |
| A(34-32-40) | 118.42 |
| A(32-34-35) | 118.90 |
| A(32-34-36) | 122.28 |



|             |        |
|-------------|--------|
| A(35-33-41) | 118.38 |
| A(33-35-34) | 118.94 |
| A(33-35-37) | 122.27 |
| A(35-34-36) | 118.81 |
| A(34-35-37) | 118.78 |
| A(34-36-38) | 120.95 |
| A(34-36-42) | 118.69 |
| A(35-37-39) | 120.96 |
| A(35-37-43) | 118.67 |
| A(38-36-42) | 120.36 |
| A(36-38-44) | 120.05 |
| A(36-38-39) | 120.25 |
| A(39-37-43) | 120.36 |
| A(37-39-38) | 120.25 |
| A(37-39-45) | 120.05 |
| A(44-38-39) | 119.70 |
| A(38-39-45) | 119.70 |
| A(55-54-56) | 118.59 |
| A(54-55-57) | 122.68 |
| A(54-55-60) | 116.01 |
| A(54-56-58) | 122.36 |
| A(54-56-61) | 115.06 |
| A(57-55-60) | 121.31 |
| A(55-57-59) | 118.66 |
| A(55-57-62) | 119.94 |
| A(58-56-61) | 122.57 |
| A(56-58-59) | 118.90 |
| A(56-58-63) | 119.80 |
| A(59-57-62) | 121.40 |
| A(57-59-58) | 118.81 |
| A(57-59-64) | 120.56 |
| A(59-58-63) | 121.30 |
| A(58-59-64) | 120.63 |

**VI. Parameters of distortion from the planarity of the  $N_2O_2$  coordinated atoms for dimers and adducts.**

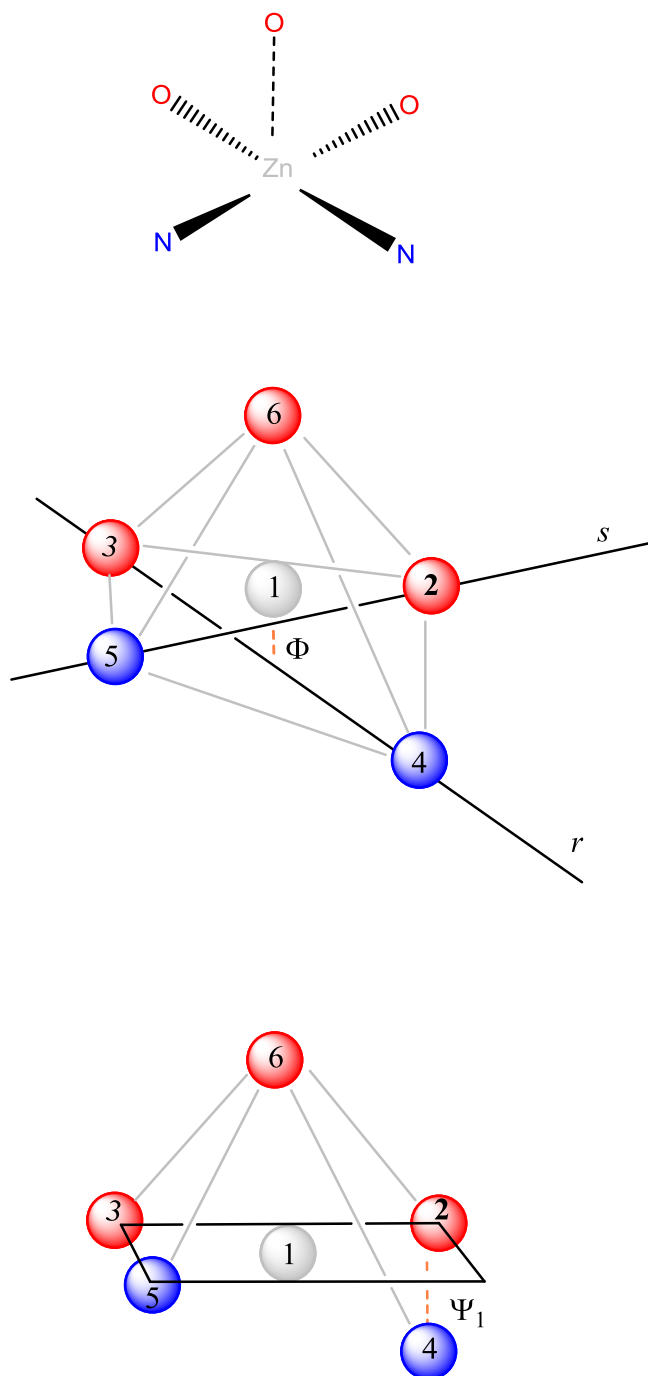

**Fig. S3** Graphical representation of distortion parameters  $\Phi$  and  $\Psi_1$ .

## Coordination sphere of 1D

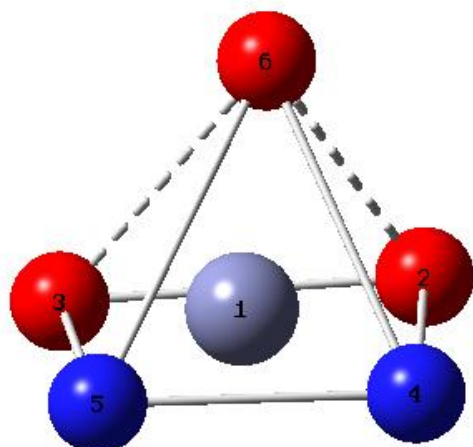

Cartesian coordinates

|                 |         |         |         |
|-----------------|---------|---------|---------|
| Zn <sub>1</sub> | 0.8648  | 0.3886  | 1.2315  |
| O <sub>2</sub>  | -0.7622 | 1.1311  | 0.2075  |
| O <sub>3</sub>  | 2.2689  | 1.4598  | 0.3531  |
| N <sub>4</sub>  | -0.4940 | -0.2909 | 2.6214  |
| N <sub>5</sub>  | 2.1632  | -0.1382 | 2.7355  |
| O <sub>6</sub>  | 0.7622  | -1.1310 | -0.2075 |

| <i>d</i> | Å    | ∠     | °      |
|----------|------|-------|--------|
| 2-3      | 3.05 | 2-1-6 | 83.19  |
| 2-4      | 2.81 | 3-1-6 | 97.06  |
| 2-5      | 4.07 | 4-1-6 | 101.07 |
| 3-4      | 3.98 | 5-1-6 | 110.34 |
| 3-5      | 2.87 | 2-1-5 | 162.66 |
| 1-6      | 2.10 | 3-1-4 | 161.73 |
| 2-6      | 2.76 |       |        |
| 3-6      | 3.05 |       |        |
| 4-6      | 3.21 |       |        |
| 5-6      | 3.41 |       |        |

Equations of planes:

$$\alpha_1 (\text{O}_2\text{O}_3\text{N}_4) = -0.226x + 1.654y + z - 2.251 = 0$$

$$\alpha_2 (\text{O}_2\text{O}_3\text{N}_5) = -0.211x + 1.508y + z - 2.047 = 0$$

$$\alpha_3 (\text{O}_2\text{N}_4\text{N}_5) = -0.140x + 1.671y + z - 2.204 = 0$$

$$\alpha_4 (\text{O}_3\text{N}_4\text{N}_5) = -0.130x + 1.503y + z - 2.248 = 0$$

## Coordination sphere of 2D

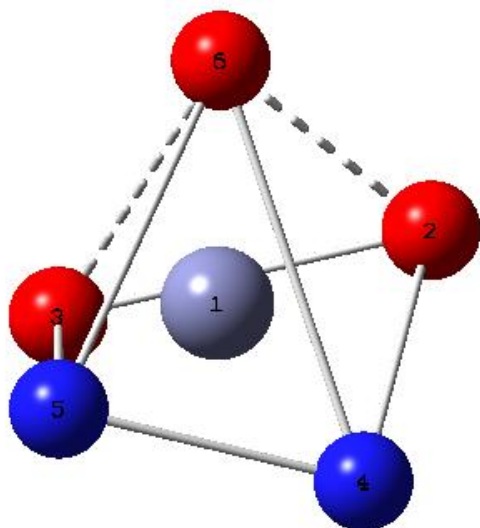

### Cartesian coordinates

|                 |         |         |         |
|-----------------|---------|---------|---------|
| Zn <sub>1</sub> | -1.3483 | -0.3128 | -0.8856 |
| O <sub>2</sub>  | 0.6984  | -0.2736 | -1.0681 |
| O <sub>3</sub>  | -1.9937 | 1.5463  | -1.1213 |
| N <sub>4</sub>  | -1.1872 | -1.9180 | -2.2613 |
| N <sub>5</sub>  | -3.2685 | -1.0078 | -0.9225 |
| O <sub>6</sub>  | -0.6984 | -0.2736 | 1.0681  |

| <i>d</i> | Å    | ∠     | °      |
|----------|------|-------|--------|
| 2-3      | 3.25 | 2-1-6 | 76.68  |
| 2-4      | 2.77 | 3-1-6 | 101.40 |
| 2-5      | 4.04 | 4-1-6 | 127.30 |
| 3-4      | 3.74 | 5-1-6 | 108.68 |
| 3-5      | 2.86 | 2-1-5 | 160.25 |
| 1-6      | 2.06 | 3-1-4 | 131.13 |
| 2-6      | 2.55 |       |        |
| 3-6      | 3.13 |       |        |
| 4-6      | 3.75 |       |        |
| 5-6      | 3.33 |       |        |

### Equations of planes:

$$\alpha_1 (\text{O}_2\text{O}_3\text{N}_4) = -0.289x - 0.396y + z + 1.160 = 0$$

$$\alpha_2 (\text{O}_2\text{O}_3\text{N}_5) = 0.024x + 0.065y + z + 1.069 = 0$$

$$\alpha_3 (\text{O}_2\text{N}_4\text{N}_5) = 0.217x - 0.974y + z + 0.650 = 0$$

$$\alpha_4 (\text{O}_3\text{N}_4\text{N}_5) = 0.555x - 0.200y + z + 2.537 = 0$$

## Coordination sphere of 3D

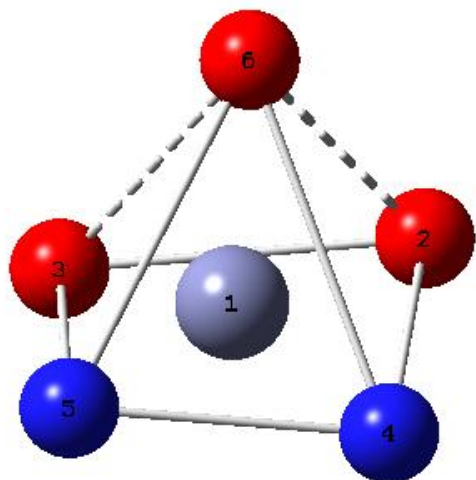

### Cartesian coordinates

|                 |         |         |         |
|-----------------|---------|---------|---------|
| Zn <sub>1</sub> | -0.9367 | -0.8935 | -0.8801 |
| O <sub>2</sub>  | 0.7435  | 0.2199  | -1.1083 |
| O <sub>3</sub>  | -2.2754 | 0.4384  | -1.4271 |
| N <sub>4</sub>  | 0.2479  | -2.5894 | -1.0511 |
| N <sub>5</sub>  | -2.3936 | -2.3622 | -0.8224 |
| O <sub>6</sub>  | -0.7435 | -0.2199 | 1.1083  |

| <i>d</i> | Å    | ∠     | °      |
|----------|------|-------|--------|
| 2-3      | 3.04 | 2-1-6 | 81.65  |
| 2-4      | 2.85 | 3-1-6 | 92.22  |
| 2-5      | 4.07 | 4-1-6 | 106.64 |
| 3-4      | 3.96 | 5-1-6 | 105.36 |
| 3-5      | 2.87 | 2-1-5 | 167.36 |
| 1-6      | 2.11 | 3-1-4 | 156.80 |
| 2-6      | 2.71 |       |        |
| 3-6      | 3.03 |       |        |
| 4-6      | 3.36 |       |        |
| 5-6      | 3.32 |       |        |

### Equations of planes:

$$\alpha_1 (\text{O}_2\text{O}_3\text{N}_4) = -0.103x + 0.039y + z + 1.178 = 0$$

$$\alpha_2 (\text{O}_2\text{O}_3\text{N}_5) = -0.090x + 0.221y + z + 1.128 = 0$$

$$\alpha_3 (\text{O}_2\text{N}_4\text{N}_5) = 0.088x + 0.006y + z + 1.044 = 0$$

$$\alpha_4 (\text{O}_3\text{N}_4\text{N}_5) = 0.106x + 0.214y + z + 1.577 = 0$$

## Coordination sphere of 4D

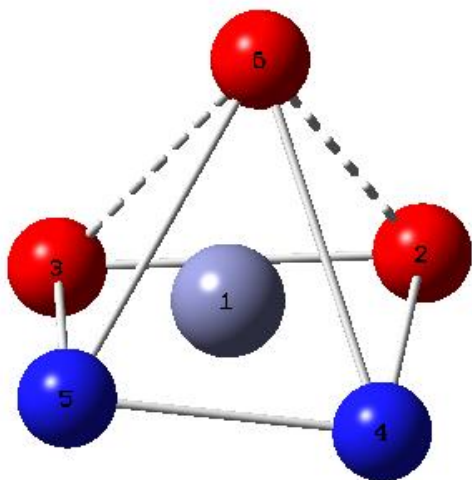

### Cartesian coordinates

|                 |         |         |         |
|-----------------|---------|---------|---------|
| Zn <sub>1</sub> | 1.0401  | 0.7077  | -0.9284 |
| O <sub>2</sub>  | -0.6789 | -0.3892 | -1.1006 |
| O <sub>3</sub>  | 2.3415  | -0.7479 | -1.1701 |
| N <sub>4</sub>  | -0.0792 | 2.3573  | -1.4766 |
| N <sub>5</sub>  | 2.5192  | 2.1327  | -1.0862 |
| O <sub>6</sub>  | 0.6789  | 0.3892  | 1.1006  |

| <i>d</i> | Å    | ∠     | °      |
|----------|------|-------|--------|
| 2-3      | 3.04 | 2-1-6 | 81.63  |
| 2-4      | 2.84 | 3-1-6 | 96.96  |
| 2-5      | 4.07 | 4-1-6 | 106.62 |
| 3-4      | 3.95 | 5-1-6 | 107.73 |
| 3-5      | 2.89 | 2-1-5 | 165.35 |
| 1-6      | 2.09 | 3-1-4 | 156.32 |
| 2-6      | 2.70 |       |        |
| 3-6      | 3.04 |       |        |
| 4-6      | 3.33 |       |        |
| 5-6      | 3.35 |       |        |

### Equations of planes:

$$\alpha_1 (\text{O}_2\text{O}_3\text{N}_4) = 0.038x + 0.129y + z + 1.177 = 0$$

$$\alpha_2 (\text{O}_2\text{O}_3\text{N}_5) = 0.019x - 0.030y + z + 1.102 = 0$$

$$\alpha_3 (\text{O}_2\text{N}_4\text{N}_5) = -0.134x + 0.166y + z + 1.074 = 0$$

$$\alpha_4 (\text{O}_3\text{N}_4\text{N}_5) = -0.150x - 0.019y + z + 1.508 = 0$$

## Coordination sphere of 5D

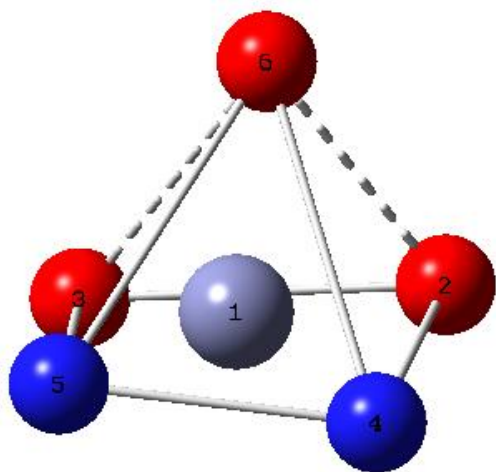

### Cartesian coordinates

|                 |         |         |         |
|-----------------|---------|---------|---------|
| Zn <sub>1</sub> | -0.9901 | -0.8839 | 0.8263  |
| O <sub>2</sub>  | 0.7384  | -1.1091 | -0.2290 |
| O <sub>3</sub>  | -2.2834 | -1.3867 | -0.5764 |
| N <sub>4</sub>  | 0.1675  | -1.1218 | 2.5401  |
| N <sub>5</sub>  | -2.4568 | -0.9016 | 2.2492  |
| O <sub>6</sub>  | -0.7384 | 1.1091  | 0.2290  |

| <i>d</i> | Å    | ∠     | °      |
|----------|------|-------|--------|
| 2-3      | 3.05 | 2-1-6 | 81.70  |
| 2-4      | 2.83 | 3-1-6 | 96.80  |
| 2-5      | 4.05 | 4-1-6 | 106.05 |
| 3-4      | 3.97 | 5-1-6 | 107.03 |
| 3-5      | 2.87 | 2-1-5 | 165.57 |
| 1-6      | 2.10 | 3-1-4 | 157.02 |
| 2-6      | 2.70 |       |        |
| 3-6      | 3.04 |       |        |
| 4-6      | 3.34 |       |        |
| 5-6      | 3.33 |       |        |

### Equations of planes:

$$\alpha_1 (\text{O}_2\text{O}_3\text{N}_4) = 6.497x - 71.845y + z - 84.241 = 0$$

$$\alpha_2 (\text{O}_2\text{O}_3\text{N}_5) = 0.408x - 5.679y + z - 6.369 = 0$$

$$\alpha_3 (\text{O}_2\text{N}_4\text{N}_5) = 3.795x + 46.604y + z + 49.112 = 0$$

$$\alpha_4 (\text{O}_3\text{N}_4\text{N}_5) = -0.618x - 6.046y + z - 9.220 = 0$$

## Coordination sphere of 6D

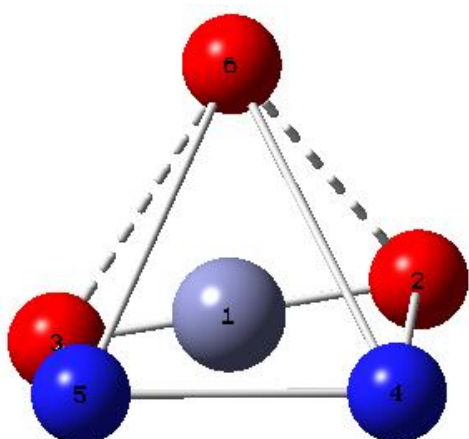

### Cartesian coordinates

|                 |         |         |         |
|-----------------|---------|---------|---------|
| Zn <sub>1</sub> | -0.0589 | -0.8852 | 1.2896  |
| O <sub>2</sub>  | 0.1788  | -1.1126 | -0.7321 |
| O <sub>3</sub>  | -1.9950 | -1.2162 | 1.4037  |
| N <sub>4</sub>  | 1.9450  | -1.3796 | 1.4559  |
| N <sub>5</sub>  | 0.1378  | -1.0059 | 3.3349  |
| O <sub>6</sub>  | -0.1788 | 1.1126  | 0.7321  |

| <i>d</i> | Å    | ∠     | °      |
|----------|------|-------|--------|
| 2-3      | 3.05 | 2-1-6 | 81.29  |
| 2-4      | 2.82 | 3-1-6 | 96.92  |
| 2-5      | 4.07 | 4-1-6 | 107.88 |
| 3-4      | 3.94 | 5-1-6 | 109.18 |
| 3-5      | 2.88 | 2-1-5 | 164.41 |
| 1-6      | 2.08 | 3-1-4 | 155.16 |
| 2-6      | 2.69 |       |        |
| 3-6      | 3.03 |       |        |
| 4-6      | 3.35 |       |        |
| 5-6      | 3.37 |       |        |

### Equations of planes:

$$\alpha_1 (\text{O}_2\text{O}_3\text{N}_4) = 0.451x + 11.178y + z + 13.088 = 0$$

$$\alpha_2 (\text{O}_2\text{O}_3\text{N}_5) = 2.747x - 37.095y + z - 41.031 = 0$$

$$\alpha_3 (\text{O}_2\text{N}_4\text{N}_5) = -7.439x - 41.013y + z - 43.569 = 0$$

$$\alpha_4 (\text{O}_3\text{N}_4\text{N}_5) = -0.278x - 6.372y + z - 9.707 = 0$$



## Coordination sphere of 1·py

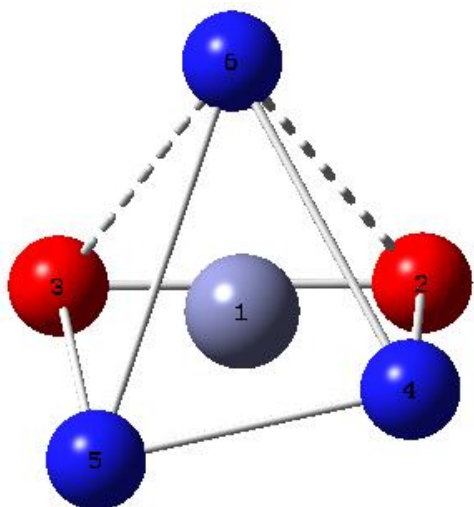

### Cartesian coordinates

|                 |         |         |         |
|-----------------|---------|---------|---------|
| Zn <sub>1</sub> | 0.0020  | -0.4113 | -0.3313 |
| O <sub>2</sub>  | 1.4922  | 0.8787  | -0.1145 |
| O <sub>3</sub>  | -1.5138 | 0.8465  | -0.0999 |
| N <sub>4</sub>  | 1.3846  | -1.8398 | -0.9919 |
| N <sub>5</sub>  | -1.2189 | -1.5773 | -1.5408 |
| N <sub>6</sub>  | -0.0527 | -0.9778 | 1.7336  |

| <i>d</i> | Å    | ∠     | °      |
|----------|------|-------|--------|
| 2-3      | 3.01 | 2-1-6 | 94.93  |
| 2-4      | 2.86 | 3-1-6 | 92.04  |
| 2-5      | 3.93 | 4-1-6 | 98.07  |
| 3-4      | 4.05 | 5-1-6 | 113.45 |
| 3-5      | 2.84 | 2-1-5 | 150.55 |
| 1-6      | 2.14 | 3-1-4 | 166.83 |
| 2-6      | 3.04 |       |        |
| 3-6      | 2.97 |       |        |
| 4-6      | 3.20 |       |        |
| 5-6      | 3.53 |       |        |

### Equations of planes:

$$\alpha_1 (\text{O}_2\text{O}_3\text{N}_4) = 0.007x - 0.324y + z + 0.385 = 0$$

$$\alpha_2 (\text{O}_2\text{O}_3\text{N}_5) = 0.009x - 0.592y + z + 0.617 = 0$$

$$\alpha_3 (\text{O}_2\text{N}_4\text{N}_5) = -0.243x - 0.314y + z + 0.748 = 0$$

$$\alpha_4 (\text{O}_3\text{N}_4\text{N}_5) = -0.274x - 0.625y + z + 0.218 = 0$$

## Coordination sphere of 2·py

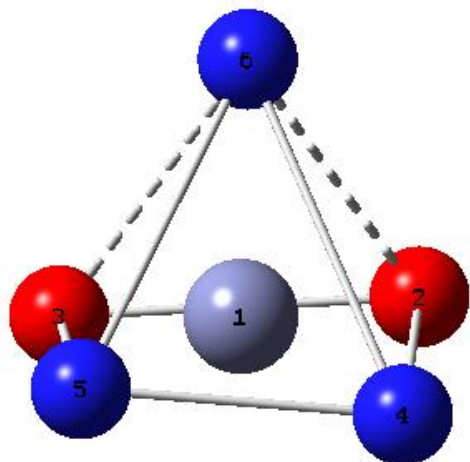

### Cartesian coordinates

|                 |         |         |         |
|-----------------|---------|---------|---------|
| Zn <sub>1</sub> | -0.0327 | 0.1371  | -0.0012 |
| O <sub>2</sub>  | -1.6082 | -0.9141 | -0.6800 |
| O <sub>3</sub>  | 1.3584  | -1.2022 | -0.5084 |
| N <sub>4</sub>  | -1.1398 | 1.8596  | -0.1623 |
| N <sub>5</sub>  | 1.4665  | 1.5402  | 0.3591  |
| N <sub>6</sub>  | -0.3824 | -0.6007 | 1.9811  |

| <i>d</i> | Å    | ∠     | °      |
|----------|------|-------|--------|
| 2-3      | 2.99 | 2-1-6 | 90.25  |
| 2-4      | 2.86 | 3-1-6 | 96.76  |
| 2-5      | 4.07 | 4-1-6 | 105.86 |
| 3-4      | 3.97 | 5-1-6 | 100.90 |
| 3-5      | 2.87 | 2-1-5 | 166.68 |
| 1-6      | 2.14 | 3-1-4 | 156.69 |
| 2-6      | 2.95 |       |        |
| 3-6      | 3.10 |       |        |
| 4-6      | 3.35 |       |        |
| 5-6      | 3.26 |       |        |

### Equations of planes:

$$\alpha_1 (\text{O}_2\text{O}_3\text{N}_4) = -0.074x - 0.175y + z + 0.401 = 0$$

$$\alpha_2 (\text{O}_2\text{O}_3\text{N}_5) = -0.088x - 0.314y + z + 0.253 = 0$$

$$\alpha_3 (\text{O}_2\text{N}_4\text{N}_5) = -0.218x - 0.151y + z + 0.192 = 0$$

$$\alpha_4 (\text{O}_3\text{N}_4\text{N}_5) = -0.237x - 0.308y + z + 0.463 = 0$$

## Coordination sphere of 3·py

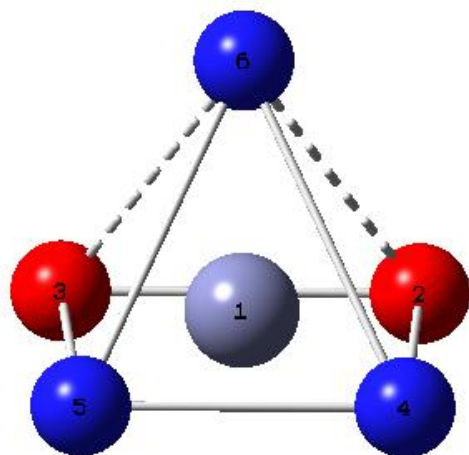

### Cartesian coordinates

|                 |         |         |         |
|-----------------|---------|---------|---------|
| Zn <sub>1</sub> | 0.0025  | 0.1002  | -0.2314 |
| O <sub>2</sub>  | -1.4748 | -1.1704 | -0.6016 |
| O <sub>3</sub>  | 1.4866  | -1.1703 | -0.5853 |
| N <sub>4</sub>  | -1.3343 | 1.6947  | -0.4376 |
| N <sub>5</sub>  | 1.3380  | 1.6958  | -0.4316 |
| N <sub>6</sub>  | -0.0065 | -0.2134 | 1.8676  |

| <i>d</i> | Å    | ∠     | °      |
|----------|------|-------|--------|
| 2-3      | 2.96 | 2-1-6 | 94.88  |
| 2-4      | 2.87 | 3-1-6 | 94.88  |
| 2-5      | 4.02 | 4-1-6 | 101.98 |
| 3-4      | 4.02 | 5-1-6 | 102.14 |
| 3-5      | 2.87 | 2-1-5 | 161.26 |
| 1-6      | 2.12 | 3-1-4 | 161.50 |
| 2-6      | 3.03 |       |        |
| 3-6      | 3.03 |       |        |
| 4-6      | 3.27 |       |        |
| 5-6      | 3.28 |       |        |

### Equations of planes:

$$\alpha_1 (\text{O}_2\text{O}_3\text{N}_4) = -0.003x - 0.056y + z + 0.530 = 0$$

$$\alpha_2 (\text{O}_2\text{O}_3\text{N}_5) = -0.003x - 0.056y + z + 0.530 = 0$$

$$\alpha_3 (\text{O}_2\text{N}_4\text{N}_5) = -0.004x - 0.056y + z + 0.530 = 0$$

$$\alpha_4 (\text{O}_3\text{N}_4\text{N}_5) = -0.004x - 0.056y + z + 0.530 = 0$$

## Coordination sphere of 4·py

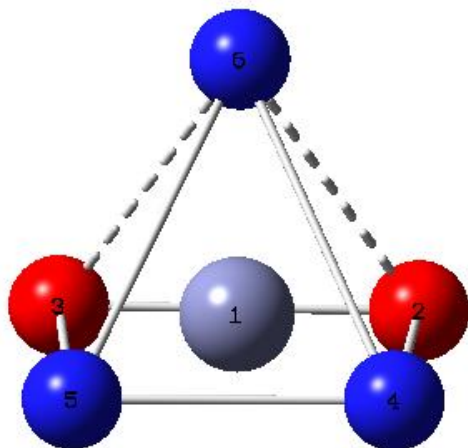

### Cartesian coordinates

|                 |         |         |         |
|-----------------|---------|---------|---------|
| Zn <sub>1</sub> | 0.0100  | 0.0549  | 0.0204  |
| O <sub>2</sub>  | -1.4446 | -1.2960 | 0.0334  |
| O <sub>3</sub>  | 1.5170  | -1.2526 | 0.0990  |
| N <sub>4</sub>  | -1.3241 | 1.4881  | -0.6930 |
| N <sub>5</sub>  | 1.3246  | 1.5172  | -0.6616 |
| N <sub>6</sub>  | -0.0413 | 0.3678  | 2.1216  |

| <i>d</i> | Å    | ∠     | °      |
|----------|------|-------|--------|
| 2-3      | 2.93 | 2-1-6 | 94.36  |
| 2-4      | 2.88 | 3-1-6 | 94.34  |
| 2-5      | 4.01 | 4-1-6 | 102.81 |
| 3-4      | 4.03 | 5-1-6 | 103.64 |
| 3-5      | 2.88 | 2-1-5 | 160.58 |
| 1-6      | 2.12 | 3-1-4 | 161.26 |
| 2-6      | 3.02 |       |        |
| 3-6      | 3.02 |       |        |
| 4-6      | 3.29 |       |        |
| 5-6      | 3.31 |       |        |

### Equations of planes:

$$\alpha_1 (\text{O}_2\text{O}_3\text{N}_4) = -0.028x + 0.259y + z + 0.267 = 0$$

$$\alpha_2 (\text{O}_2\text{O}_3\text{N}_5) = -0.027x + 0.273y + z + 0.283 = 0$$

$$\alpha_3 (\text{O}_2\text{N}_4\text{N}_5) = -0.014x + 0.259y + z + 0.286 = 0$$

$$\alpha_4 (\text{O}_3\text{N}_4\text{N}_5) = -0.014x + 0.273y + z + 0.264 = 0$$

## Coordination sphere of 5·py

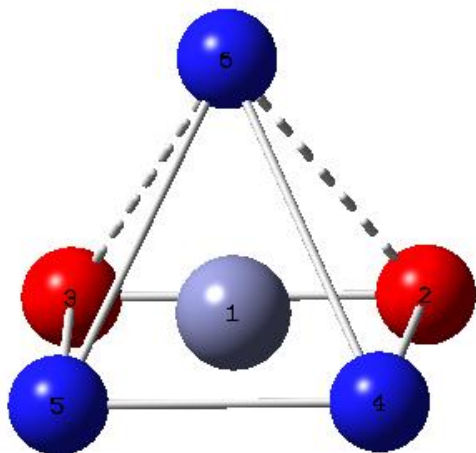

### Cartesian coordinates

|                 |         |         |         |
|-----------------|---------|---------|---------|
| Zn <sub>1</sub> | -0.0146 | 0.0639  | -0.1577 |
| O <sub>2</sub>  | -1.4882 | -1.2540 | -0.3730 |
| O <sub>3</sub>  | 1.4461  | -1.2548 | -0.4224 |
| N <sub>4</sub>  | -1.3584 | 1.6292  | -0.4563 |
| N <sub>5</sub>  | 1.3047  | 1.5988  | -0.5171 |
| N <sub>6</sub>  | 0.0175  | -0.1172 | 1.9714  |

| <i>d</i> | Å    | ∠     | °      |
|----------|------|-------|--------|
| 2-3      | 2.93 | 2-1-6 | 93.60  |
| 2-4      | 2.89 | 3-1-6 | 93.75  |
| 2-5      | 3.99 | 4-1-6 | 102.48 |
| 3-4      | 4.02 | 5-1-6 | 103.17 |
| 3-5      | 2.86 | 2-1-5 | 162.08 |
| 1-6      | 2.14 | 3-1-4 | 162.53 |
| 2-6      | 3.01 |       |        |
| 3-6      | 3.01 |       |        |
| 4-6      | 3.29 |       |        |
| 5-6      | 3.29 |       |        |

### Equations of planes:

$$\alpha_1 (\text{O}_2\text{O}_3\text{N}_4) = 0.017x + 0.030y + z + 0.433 = 0$$

$$\alpha_2 (\text{O}_2\text{O}_3\text{N}_5) = 0.017x + 0.036y + z + 0.440 = 0$$

$$\alpha_3 (\text{O}_2\text{N}_4\text{N}_5) = 0.023x + 0.030y + z + 0.442 = 0$$

$$\alpha_4 (\text{O}_3\text{N}_4\text{N}_5) = 0.023x + 0.036y + z + 0.432 = 0$$

## Coordination sphere of 6·py

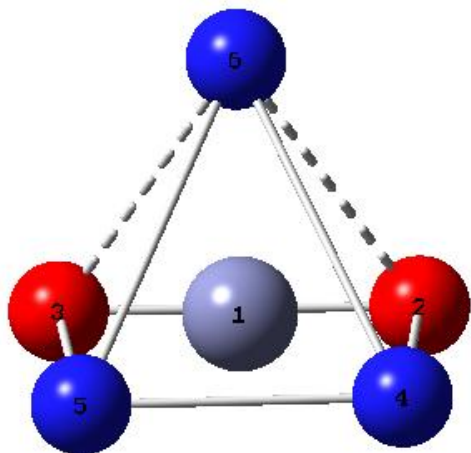

### Cartesian coordinates

|                 |         |         |         |
|-----------------|---------|---------|---------|
| Zn <sub>1</sub> | 0.0295  | -0.5817 | 0.1175  |
| O <sub>2</sub>  | -1.3902 | -1.9682 | 0.0274  |
| O <sub>3</sub>  | 1.5753  | -1.8476 | 0.0914  |
| N <sub>4</sub>  | -1.3420 | 0.8593  | -0.5014 |
| N <sub>5</sub>  | 1.2980  | 0.9583  | -0.4722 |
| N <sub>6</sub>  | -0.0199 | -0.4207 | 2.2305  |

| <i>d</i> | Å    | ∠     | °      |
|----------|------|-------|--------|
| 2-3      | 2.97 | 2-1-6 | 94.68  |
| 2-4      | 2.88 | 3-1-6 | 94.54  |
| 2-5      | 4.01 | 4-1-6 | 103.19 |
| 3-4      | 4.02 | 5-1-6 | 103.92 |
| 3-5      | 2.88 | 2-1-5 | 159.98 |
| 1-6      | 2.12 | 3-1-4 | 160.66 |
| 2-6      | 3.02 |       |        |
| 3-6      | 3.03 |       |        |
| 4-6      | 3.29 |       |        |
| 5-6      | 3.31 |       |        |

### Equations of planes:

$$\alpha_1 (\text{O}_2\text{O}_3\text{N}_4) = -0.028x + 0.189y + z + 0.301 = 0$$

$$\alpha_2 (\text{O}_2\text{O}_3\text{N}_5) = -0.028x + 0.197y + z + 0.318 = 0$$

$$\alpha_3 (\text{O}_2\text{N}_4\text{N}_5) = -0.018x + 0.188y + z + 0.314 = 0$$

$$\alpha_4 (\text{O}_3\text{N}_4\text{N}_5) = -0.019x + 0.198y + z + 0.305 = 0$$

**VII. Correlation between distortion parameters  $\Phi$  and  $\Psi$  vs.  $\Delta G$  of dimerization and  $\Delta G$  for the formation of adducts with pyridine**

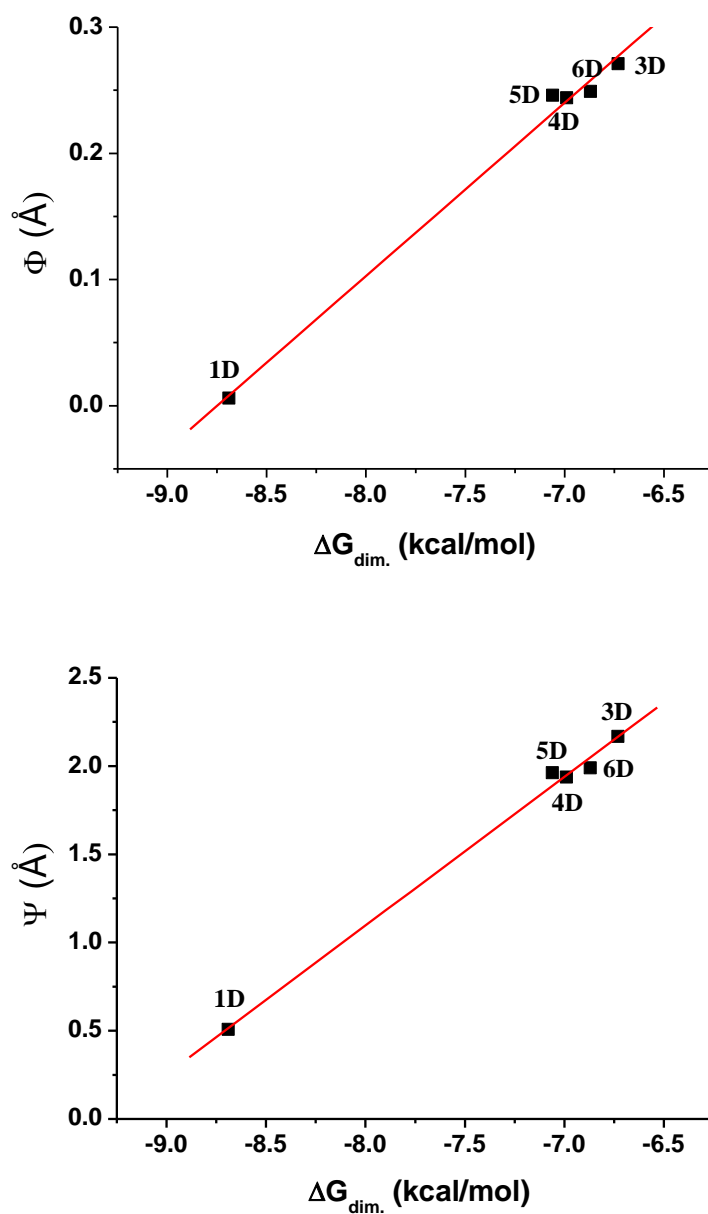

**Fig. S4** Plot of distortion parameters  $\Phi$  and  $\Psi$  vs.  $\Delta G$  of dimerization for complexes **1** and **3-6**.

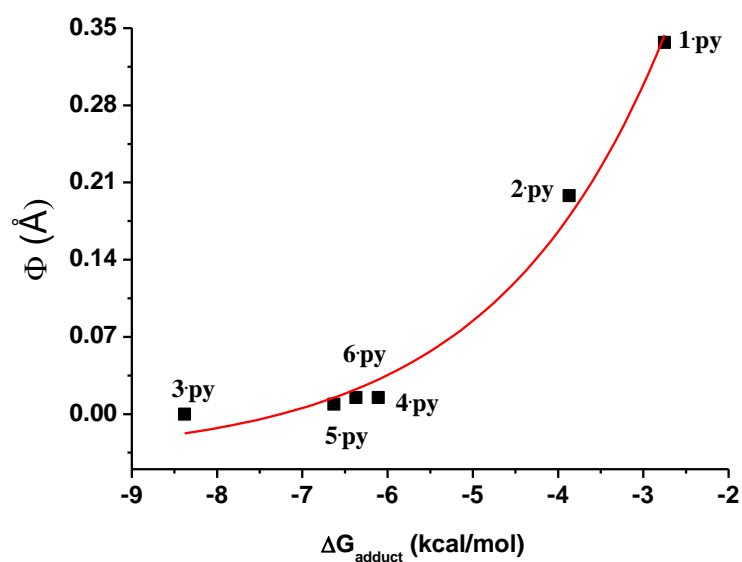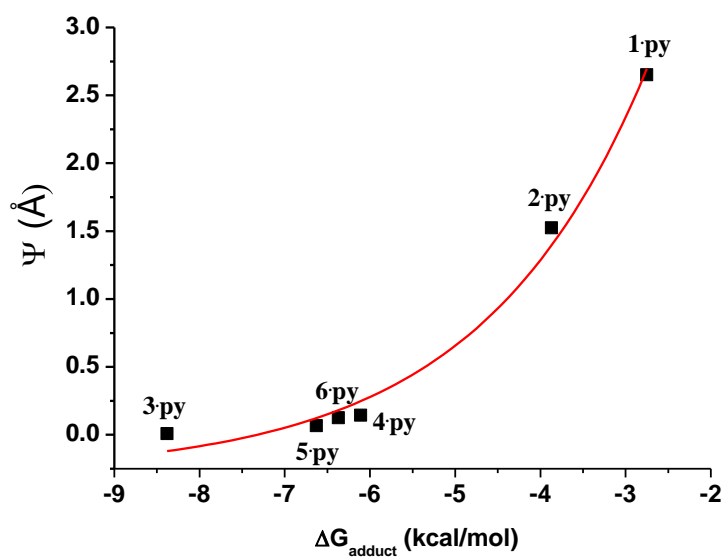

**Fig. S5** Plot of distortion parameters  $\Phi$  and  $\Psi$  vs.  $\Delta G$  for the formation of 1-6.py adducts.



### VIII. Spectrophotometric titration of complex **4a** with pyridine

The optical absorption variations for titration of **4a** with pyridine and the relative binding isotherm are typical of conjugated complexes **3a-6a**.

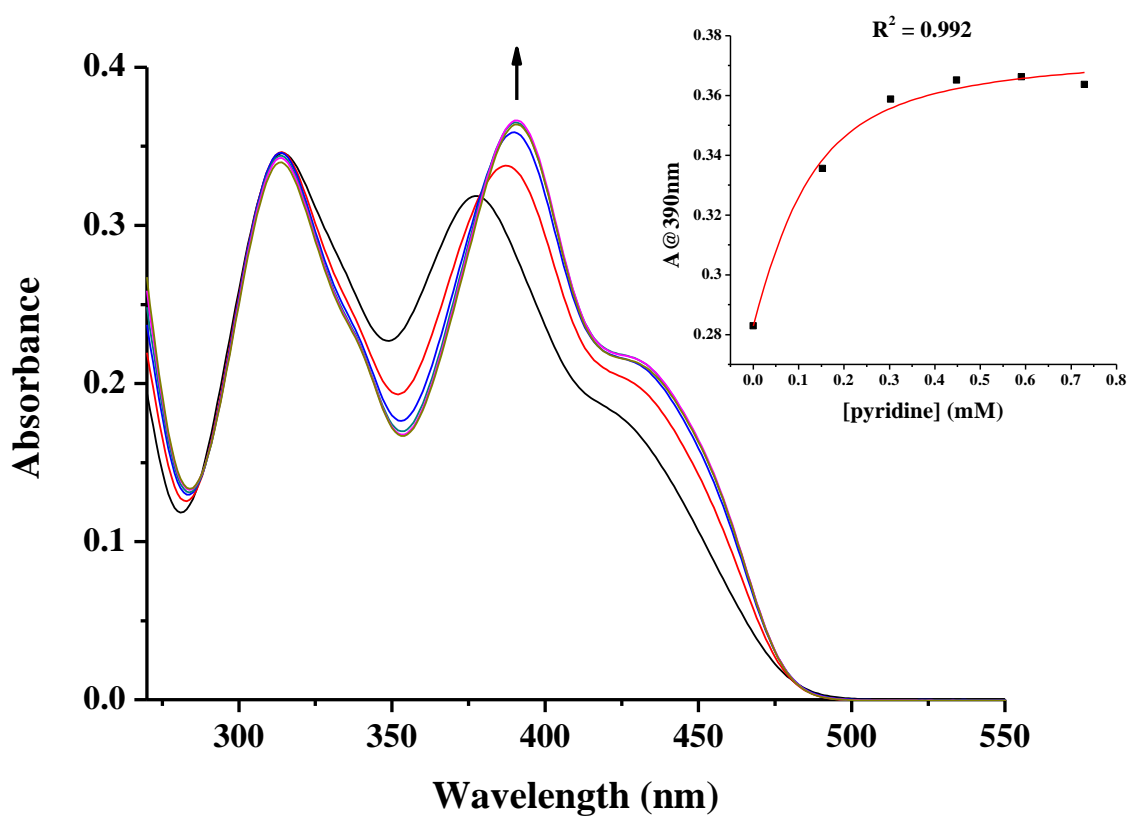

**Fig. S6** UV-vis absorption titration curves of **4a** (100  $\mu\text{M}$  solution in  $\text{CHCl}_3$ ) with the addition of pyridine. The concentration of pyridine added varied from 0 to 0.73 mM. (Inset) Binding isotherm of **4a** with pyridine at 390nm.

**IX. Binding isotherms of complexes 2, 3a, 5a, and 6a with pyridine**

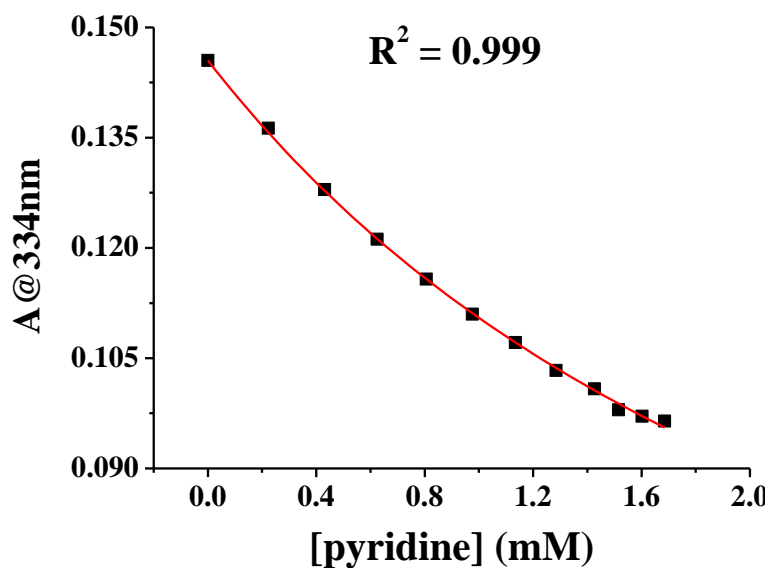

**Fig. S7** Binding isotherm of **2** (100  $\mu\text{M}$  solution in  $\text{CHCl}_3$ ) with pyridine at 334nm. The concentration of pyridine added varied from 0 to 1.7 mM.

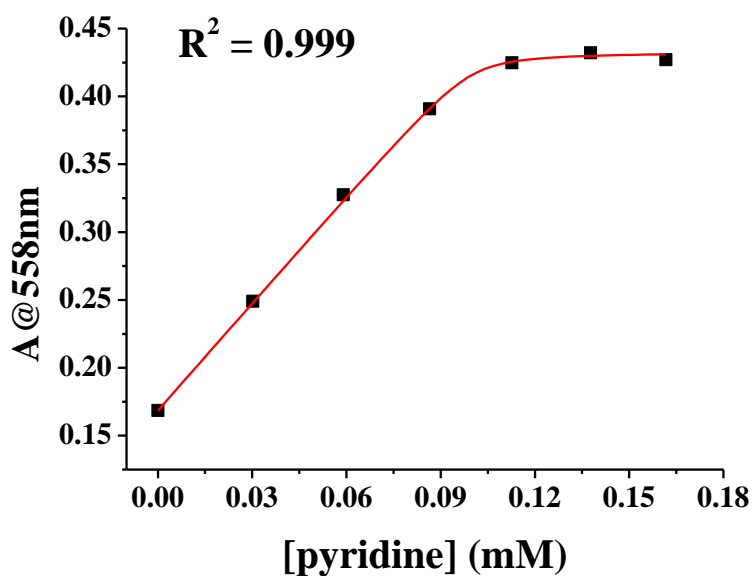

**Fig. S8** Binding isotherm of **3a** (100  $\mu\text{M}$  solution in  $\text{CHCl}_3$ ) with pyridine at 558 nm. The concentration of pyridine added varied from 0 to 0.16 mM.

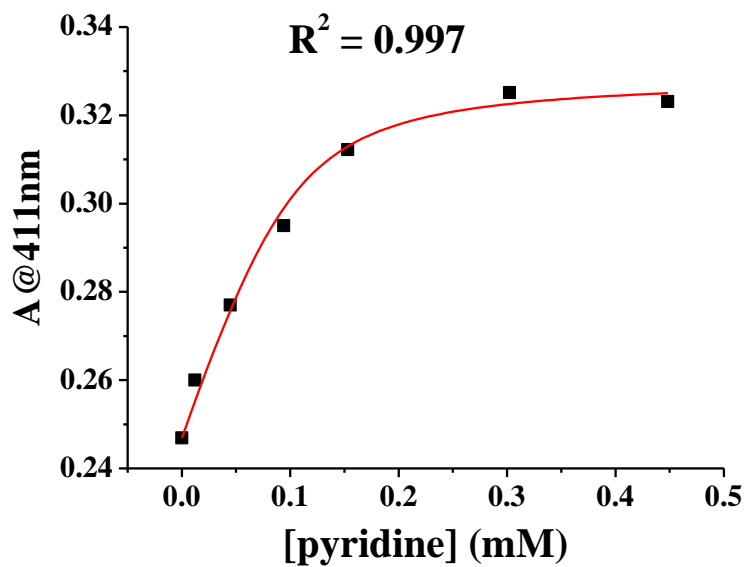

**Fig. S9** Binding isotherm of **5a** (100  $\mu$ M solution in  $\text{CHCl}_3$ ) with pyridine at 411 nm. The concentration of pyridine added varied from 0 to 0.45 mM.

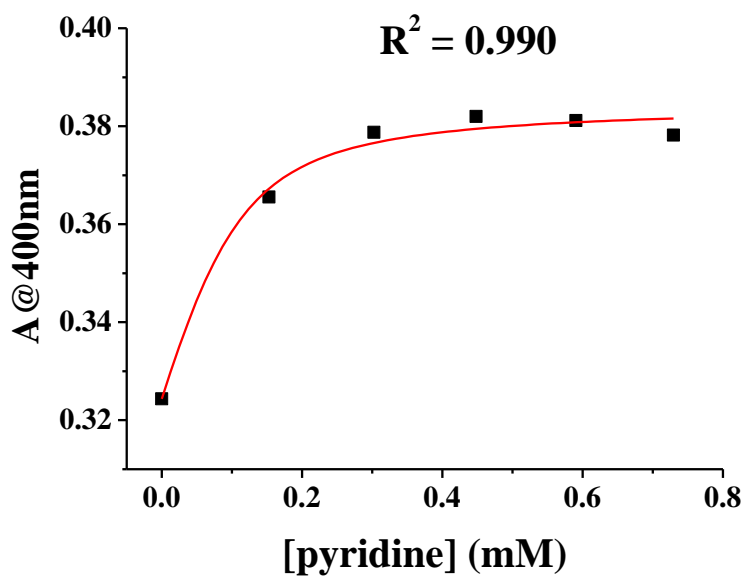

**Fig. S10** Binding isotherm of **6a** (100  $\mu$ M solution in  $\text{CHCl}_3$ ) with pyridine at 400 nm. The concentration of pyridine added varied from 0 to 0.73 mM.

**X. Experimental derived binding constants for the formation of 1-6·py adducts**

**Table S6** Experimental derived binding constants,  $\log K$ , and coefficients of determination,  $R^2$ , for replicate titrations of complexes **1a**, **2**, **3a-6a** with pyridine, and average  $\log K$  values with relative standard deviations

| Complex   | $\log K$ | $R^2$ | $\log K \pm \sigma$ |
|-----------|----------|-------|---------------------|
| <b>1a</b> | 1.80     | 0.996 | $1.95 \pm 0.17$     |
|           | 2.14     | 0.994 |                     |
|           | 1.92     | 0.987 |                     |
| <b>2</b>  | 3.06     | 0.997 | $2.93 \pm 0.15$     |
|           | 2.96     | 0.998 |                     |
|           | 2.76     | 0.999 |                     |
| <b>3a</b> | 6.35     | 0.999 | $6.17 \pm 0.17$     |
|           | 6.15     | 0.999 |                     |
|           | 6.01     | 0.999 |                     |
| <b>4a</b> | 4.20     | 0.992 | $4.27 \pm 0.08$     |
|           | 4.26     | 0.999 |                     |
|           | 4.36     | 0.998 |                     |
| <b>5a</b> | 4.64     | 0.999 | $4.70 \pm 0.06$     |
|           | 4.71     | 0.996 |                     |
|           | 4.75     | 0.998 |                     |
| <b>6a</b> | 4.46     | 0.993 | $4.47 \pm 0.01$     |
|           | 4.47     | 0.999 |                     |
|           | 4.48     | 0.990 |                     |
